# Supplementary material for: Synthesis and catalytic activity of tetradentate β-diketiminato rare-earth metal monoalkyl complexes in tandem Oppenauer oxidation and cross-aldol condensation
Source: Royal Society of Chemistry journal article supplement (doi:10.1039/d3dt03374k), 2023-11-24
Supplement: d3dt03374k1.pdf [file d3dt03374k1.pdf]

## *Electronic Supporting Information*

### **Synthesis and catalytic activity of tetradentate $\beta$ -diketiminato rare-earth metal monoalkyl complexes in tandem Oppenauer oxidation and cross-aldol condensation**

Haiyan Zou,<sup>a</sup> Ziqian Wang,<sup>a</sup> Dianjun Guo,<sup>a</sup> Lijun Zhang,<sup>a</sup> Shaowu Wang<sup>a,b</sup> and Xiancui Zhu<sup>\*a</sup>

<sup>a</sup>Key Laboratory of Functional Molecular Solids, Ministry of Education, Anhui Laboratory of Molecule-Based Materials, College of Chemistry and Materials Science, Anhui Normal University, Wuhu, Anhui 241002, China

<sup>b</sup>Anhui Laboratory of Clean Catalytic Engineering, Anhui Laboratory of Functional Complexes for Materials Chemistry and Application, College of Chemical and Environmental Engineering, Anhui Polytechnic University, Wuhu, Anhui 241000, China

#### **Table of contents**

|                                                              |     |
|--------------------------------------------------------------|-----|
| 1. Crystallographic data of complexes.....                   | S2  |
| Table S1. Crystallographic data for <b>1a-1d</b> .....       | S2  |
| Table S2. Crystallographic data for <b>2a-2d</b> .....       | S3  |
| 2. Molecular structures of complexes <b>1b-2d</b> .....      | S4  |
| 3. Characterization data of the catalytic products.....      | S6  |
| 4. Copies of NMR Spectra.....                                | S15 |
| Fig. S7-S14 Copies of the proligands.....                    | S15 |
| Fig. S15-S22 Copies of rare-earth metal complexes.....       | S19 |
| Fig. S23-S46 Copies of ketones.....                          | S23 |
| Fig. S47-S98 Copies of benzylidene ketones.....              | S35 |
| 5. <sup>1</sup> H NMR Monitoring the catalytic reaction..... | S61 |
| 6. A gram-scale preparation of <b>4k</b> .....               | S62 |
| 7. References.....                                           | S63 |

**Table S1. Crystallographic data of complexes 1a-1d**

|                                                                             | <b>1a (Y)</b>                                       | <b>1b (Gd)</b>                                       | <b>1c (Yb)</b>                                       | <b>1d (Lu)</b>                                       |
|-----------------------------------------------------------------------------|-----------------------------------------------------|------------------------------------------------------|------------------------------------------------------|------------------------------------------------------|
| CCDC                                                                        | 2296626                                             | 2296627                                              | 2296628                                              | 2296629                                              |
| Empirical formula                                                           | C <sub>36</sub> H <sub>52</sub> N <sub>3</sub> OSiY | C <sub>36</sub> H <sub>52</sub> N <sub>3</sub> OSiGd | C <sub>36</sub> H <sub>52</sub> N <sub>3</sub> OSiYb | C <sub>36</sub> H <sub>52</sub> N <sub>3</sub> OSiLu |
| Formula weight                                                              | 659.80                                              | 728.14                                               | 743.93                                               | 745.86                                               |
| Crystal system                                                              | Triclinic                                           | Monoclinic                                           | Triclinic                                            | Triclinic                                            |
| Space group                                                                 | <i>P</i> $\bar{1}$                                  | <i>P</i> 2 <sub>1</sub> / <i>n</i>                   | <i>P</i> $\bar{1}$                                   | <i>P</i> $\bar{1}$                                   |
| <i>a</i> (Å)                                                                | 11.0699(9)                                          | 12.8562(12)                                          | 11.0453(14)                                          | 11.017(7)                                            |
| <i>b</i> (Å)                                                                | 11.5878(9)                                          | 20.653(2)                                            | 11.5867(15)                                          | 11.593(7)                                            |
| <i>c</i> (Å)                                                                | 14.7859(12)                                         | 14.1698(13)                                          | 14.7165(19)                                          | 14.734(9)                                            |
| $\alpha$ (°)                                                                | 87.2450(10)                                         | 90                                                   | 87.403(2)                                            | 87.665(6)                                            |
| $\beta$ (°)                                                                 | 81.8270(10)                                         | 93.4440(10)                                          | 81.877(2)                                            | 82.008(15)                                           |
| $\gamma$ (°)                                                                | 79.6000(10)                                         | 90                                                   | 79.435(2)                                            | 79.438(8)                                            |
| <i>V</i> (Å <sup>3</sup> )                                                  | 1846.1(3)                                           | 3755.6(6)                                            | 1832.5(4)                                            | 1832(2)                                              |
| <i>Z</i>                                                                    | 2                                                   | 4                                                    | 2                                                    | 2                                                    |
| <i>D</i> <sub>calcd</sub> (mg m <sup>-3</sup> )                             | 1.187                                               | 1.288                                                | 1.348                                                | 1.352                                                |
| $\mu$ (mm <sup>-1</sup> )                                                   | 1.641                                               | 1.826                                                | 2.614                                                | 2.757                                                |
| <i>F</i> (000)                                                              | 700                                                 | 1500                                                 | 762                                                  | 764                                                  |
| $\theta$ range (°)                                                          | 1.392 to 27.580                                     | 1.745 to 27.703                                      | 1.398 to 27.490                                      | 1.396 to 27.502                                      |
| Reflections collected                                                       | 21694                                               | 41986                                                | 21106                                                | 21469                                                |
| Data/restraints/parameters                                                  | 8420/30/388                                         | 8723/6/388                                           | 8264/12/388                                          | 8291/48/376                                          |
| Goodness-of-fit on F <sup>2</sup>                                           | 0.960                                               | 1.010                                                | 1.016                                                | 1.051                                                |
| R(int)                                                                      | 0.0515                                              | 0.0514                                               | 0.0393                                               | 0.0309                                               |
| <i>R</i> <sub>1</sub> , <i>wR</i> <sub>2</sub> ( <i>I</i> > 2σ( <i>I</i> )) | 0.0512, 0.1100                                      | 0.0389, 0.0795                                       | 0.0345, 0.0803                                       | 0.0334, 0.0777                                       |
| Largest diff peak/hole (e Å <sup>-3</sup> )                                 | 0.428 and -0.309                                    | 0.605 and -0.668                                     | 1.050 and -0.746                                     | 1.317 and -0.757                                     |

**Table S2. Crystallographic data of complexes 2a-2d**

|                                                                             | <b>2a (Y)</b>                                                                                  | <b>2b (Gd)</b>                                                                                 | <b>2c (Yb)</b>                                                                                 | <b>2d (Lu)</b>                                       |
|-----------------------------------------------------------------------------|------------------------------------------------------------------------------------------------|------------------------------------------------------------------------------------------------|------------------------------------------------------------------------------------------------|------------------------------------------------------|
| CCDC                                                                        | 2296630                                                                                        | 2296631                                                                                        | 2296632                                                                                        | 2296633                                              |
| Empirical formula                                                           | C <sub>102</sub> H <sub>150</sub> N <sub>9</sub> O <sub>3</sub> Si <sub>3</sub> Y <sub>3</sub> | C <sub>68</sub> H <sub>100</sub> N <sub>6</sub> O <sub>2</sub> Si <sub>2</sub> Gd <sub>2</sub> | C <sub>68</sub> H <sub>100</sub> N <sub>6</sub> O <sub>2</sub> Si <sub>2</sub> Yb <sub>2</sub> | C <sub>34</sub> H <sub>50</sub> N <sub>3</sub> OSiLu |
| Formula weight                                                              | 1901.30                                                                                        | 1404.21                                                                                        | 1435.79                                                                                        | 719.83                                               |
| Crystal system                                                              | Triclinic                                                                                      | Monoclinic                                                                                     | Monoclinic                                                                                     | Monoclinic                                           |
| Space group                                                                 | <i>P</i> $\bar{1}$                                                                             | <i>C</i> 2/ <i>c</i>                                                                           | <i>C</i> 2/ <i>c</i>                                                                           | <i>C</i> 2/ <i>c</i>                                 |
| <i>a</i> (Å)                                                                | 14.531(4)                                                                                      | 35.524(3)                                                                                      | 35.46(5)                                                                                       | 35.237(9)                                            |
| <i>b</i> (Å)                                                                | 20.424(5)                                                                                      | 22.8423(16)                                                                                    | 23.07(3)                                                                                       | 22.966(6)                                            |
| <i>c</i> (Å)                                                                | 20.587(5)                                                                                      | 23.6243(16)                                                                                    | 23.60(3)                                                                                       | 23.494(6)                                            |
| $\alpha$ (°)                                                                | 117.206(3)                                                                                     | 90                                                                                             | 90                                                                                             | 90                                                   |
| $\beta$ (°)                                                                 | 92.833(3)                                                                                      | 129.8560(10)                                                                                   | 129.797(13)                                                                                    | 129.875(3)                                           |
| $\gamma$ (°)                                                                | 100.856(3)                                                                                     | 90                                                                                             | 90                                                                                             | 90                                                   |
| <i>V</i> (Å <sup>3</sup> )                                                  | 5272(2)                                                                                        | 14716(18)                                                                                      | 14828(33)                                                                                      | 14592(6)                                             |
| <i>Z</i>                                                                    | 2                                                                                              | 8                                                                                              | 8                                                                                              | 16                                                   |
| <i>D</i> <sub>calcd</sub> (mg m <sup>-3</sup> )                             | 1.198                                                                                          | 1.268                                                                                          | 1.286                                                                                          | 1.311                                                |
| $\mu$ (mm <sup>-1</sup> )                                                   | 1.721                                                                                          | 1.862                                                                                          | 2.581                                                                                          | 2.766                                                |
| <i>F</i> (000)                                                              | 2016                                                                                           | 5776                                                                                           | 5872                                                                                           | 5888                                                 |
| $\theta$ range (°)                                                          | 1.154 to 25.499                                                                                | 1.163 to 27.528                                                                                | 1.157 to 27.730                                                                                | 1.163 to 27.613                                      |
| Reflections collected                                                       | 52223                                                                                          | 86252                                                                                          | 81118                                                                                          | 81424                                                |
| Data/restraints/paramet                                                     | 19585/84/1099                                                                                  | 16880/142/781                                                                                  | 16820/169/781                                                                                  | 16616/286/766                                        |
| Goodness-of-fit on <i>F</i> <sup>2</sup>                                    | 0.950                                                                                          | 1.013                                                                                          | 1.029                                                                                          | 0.991                                                |
| R(int)                                                                      | 0.1448                                                                                         | 0.0630                                                                                         | 0.0663                                                                                         | 0.1559                                               |
| <i>R</i> <sub>1</sub> , <i>wR</i> <sub>2</sub> ( <i>I</i> > 2σ( <i>I</i> )) | 0.0620, 0.0929                                                                                 | 0.0394, 0.0774                                                                                 | 0.0435, 0.1007                                                                                 | 0.0761, 0.1948                                       |
| Largest diff peak/hole (e Å <sup>-3</sup> )                                 | 0.453 and -0.656                                                                               | 0.700 and -0.826                                                                               | 0.809 and -0.458                                                                               | 3.391 and -1.735                                     |

## Molecular structures of complexes 1b-2d.

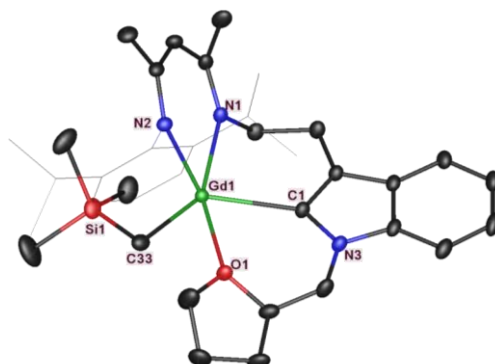

**Fig S1.** Molecular structure of **1b**. All the hydrogen atoms are omitted and 2,6-diisopropyl phenyl group was depicted in wireframe style for clarity. Selected bond lengths (Å) and angles (°): Gd(1)–N(1) 2.354(3), Gd(1)–N(2) 2.335(3), Gd(1)–C(1) 2.467(4), Gd(1)–C(33) 2.411(4), Gd(1)–O(1) 2.414(3), C(33)–Gd(1)–N(2) 117.77(14), C(33)–Gd(1)–C(1) 115.60(16).

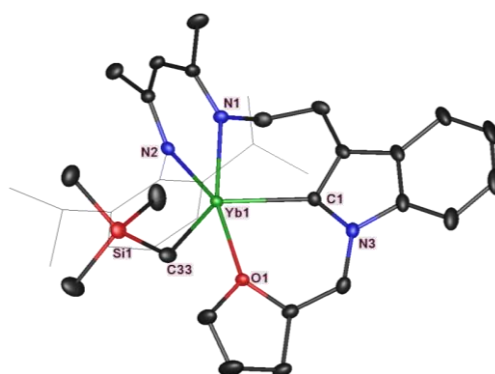

**Fig S2.** Molecular structure of **1c**. All the hydrogen atoms are omitted and 2,6-diisopropyl phenyl group was depicted in wireframe style for clarity. Selected bond lengths (Å) and angles (°): Yb(1)–N(1) 2.318(2), Yb(1)–N(2) 2.279(3), Yb(1)–C(1) 2.362(4), Yb(1)–C(33) 2.325(4), Yb(1)–O(1) 2.318(2), C(33)–Yb(1)–N(2) 118.55(15), C(33)–Yb(1)–C(1) 116.82(16).

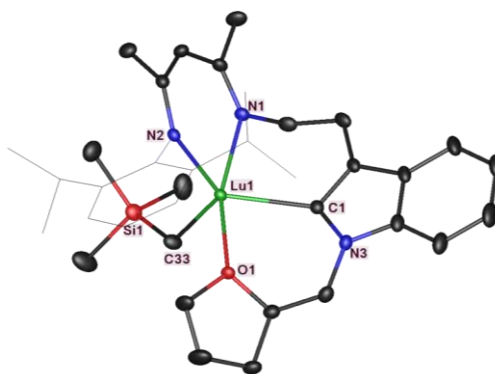

**Fig S3.** Molecular structure of **1d**. All the hydrogen atoms are omitted and 2,6-diisopropyl phenyl group was depicted in wireframe style for clarity. Selected bond lengths (Å) and angles (°): Lu(1)–N(1) 2.267(3), Lu(1)–N(2) 2.272(3), Lu(1)–C(1) 2.355(4), Lu(1)–C(33) 2.311(4), Lu(1)–O(1) 2.308(3), C(33)–Lu(1)–N(2) 118.70(15), C(33)–Lu(1)–C(1) 116.80(16).

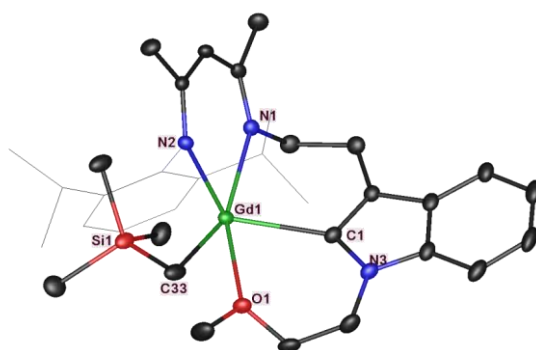

**Fig S4.** Molecular structure of **2b**. All the hydrogen atoms are omitted and 2,6-diisopropyl phenyl group was depicted in wireframe style for clarity. Selected bond lengths (Å) and angles (°): Gd(1)–N(1) 2.349(3), Gd(1)–N(2) 2.361(3), Gd(1)–C(1) 2.439(4), Gd(1)–C(33) 2.409(4), Gd(1)–O(1) 2.419(2), C(33)–Gd(1)–N(2) 127.33(13), C(33)–Gd(1)–C(1) 107.68(15).

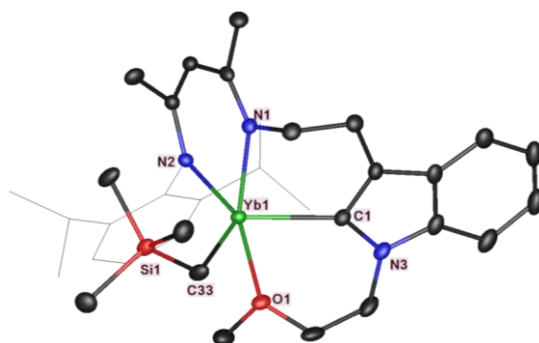

**Fig S5.** Molecular structure of **2c**. All the hydrogen atoms are omitted and 2,6-diisopropyl phenyl group was depicted in wireframe style for clarity. Selected bond lengths (Å) and angles (°): Yb(1)–N(1) 2.285(5), Yb(1)–N(2) 2.308(5), Yb(1)–C(1) 2.370(6), Yb(1)–C(33) 2.339(6), Yb(1)–O(1) 2.365(5), C(33)–Yb(1)–N(2) 125.8(2), C(33)–Yb(1)–C(1) 108.8(2).

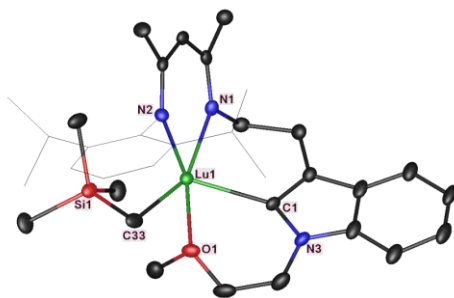

**Fig S6.** Molecular structure of **2d**. All the hydrogen atoms are omitted and 2,6-diisopropyl phenyl group was depicted in wireframe style for clarity. Selected bond lengths (Å) and angles (°): Lu(1)–N(1) 2.262(8), Lu(1)–N(2) 2.292(8), Lu(1)–C(1) 2.360(11), Lu(1)–C(33) 2.310(10), Lu(1)–O(1) 2.326(7), C(33)–Lu(1)–N(2) 126.3(4), C(33)–Lu(1)–C(1) 109.2(4).

### Characterization data of the catalytic products

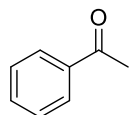

Colorless oil.<sup>1</sup> 95% yield (114.09 mg, 0.95 mmol). <sup>1</sup>H NMR (500 MHz, CDCl<sub>3</sub>, ppm): δ 7.96 (d, *J* = 7.5 Hz, 2H, Ar*H*), 7.57 (t, *J* = 7.5 Hz, 1H, Ar*H*), 7.47 (t, *J* = 7.5 Hz, 2H, Ar*H*), 2.61 (s, 3H, CH<sub>3</sub>). <sup>13</sup>C{<sup>1</sup>H} NMR (125 MHz, CDCl<sub>3</sub>, ppm): δ 198.6 (C=O), 137.5, 133.5, 129.0, 128.7 (ArC), 27.1 (CH<sub>3</sub>).

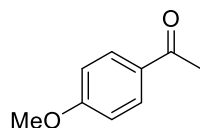

Colorless oil.<sup>1</sup> 91% yield (136.68 mg, 0.91 mmol). <sup>1</sup>H NMR (500 MHz, CDCl<sub>3</sub>, ppm): δ 7.89 (d, *J* = 9.0 Hz, 2H, Ar*H*), 6.89 (d, *J* = 9.0 Hz, 2H, Ar*H*), 3.82 (s, 3H, OCH<sub>3</sub>), 2.51 (s, 3H, CH<sub>3</sub>). <sup>13</sup>C{<sup>1</sup>H} NMR (125 MHz, CDCl<sub>3</sub>, ppm): δ 197.1 (C=O), 163.8, 130.9, 130.7, 114.0 (ArC), 55.8 (OCH<sub>3</sub>), 26.7 (CH<sub>3</sub>).

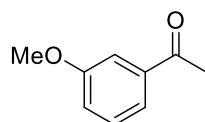

Colorless oil.<sup>2</sup> 87% yield (130.67 mg, 0.87 mmol). <sup>1</sup>H NMR (500 MHz, CDCl<sub>3</sub>, ppm): δ 7.54 (d, *J* = 8.0 Hz, 1H, Ar*H*), 7.49 (s, 1H, Ar*H*), 7.37 (t, *J* = 8.0 Hz, 1H, Ar*H*), 7.11 (dd, *J* = 2.5, 8.0 Hz, 1H, Ar*H*), 3.86 (s, 3H, OCH<sub>3</sub>), 2.60 (s, 3H, CH<sub>3</sub>). <sup>13</sup>C{<sup>1</sup>H} NMR

(125 MHz, CDCl<sub>3</sub>, ppm):  $\delta$  198.4 (C=O), 160.2, 138.9, 130.0, 121.5, 120.1, 112.7 (ArC), 55.8 (OCH<sub>3</sub>), 27.1 (CH<sub>3</sub>).

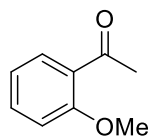

Colorless oil.<sup>2</sup> 76% yield (114.15 mg, 0.76 mmol). <sup>1</sup>H NMR (500 MHz, CDCl<sub>3</sub>, ppm):  $\delta$  7.73 (dd,  $J$  = 2.0, 7.5 Hz, 1H, ArH), 7.48–7.45 (m, 1H, ArH), 7.01–6.96 (m, 2H, ArH), 3.92 (s, 3H, OCH<sub>3</sub>), 2.62 (s, 3H, CH<sub>3</sub>). <sup>13</sup>C{<sup>1</sup>H} NMR (125 MHz, CDCl<sub>3</sub>, ppm):  $\delta$  200.3 (C=O), 159.3, 134.0, 130.8, 128.7, 121.0, 111.9 (ArC), 55.9 (OCH<sub>3</sub>), 32.2 (CH<sub>3</sub>).

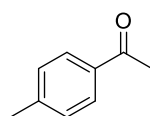

Colorless oil.<sup>1</sup> 93% yield (124.80 mg, 0.93 mmol). <sup>1</sup>H NMR (500 MHz, CDCl<sub>3</sub>, ppm):  $\delta$  7.85 (d,  $J$  = 8.0 Hz, 2H, ArH), 7.25 (d,  $J$  = 8.0 Hz, 2H, ArH), 2.57 (s, 3H, CH<sub>3</sub>), 2.41 (s, 3H, CH<sub>3</sub>). <sup>13</sup>C{<sup>1</sup>H} NMR (125 MHz, CDCl<sub>3</sub>, ppm):  $\delta$  198.3 (C=O), 144.3, 135.1, 129.6, 128.8 (ArC), 26.9 (CH<sub>3</sub>), 22.0 (CH<sub>3</sub>).

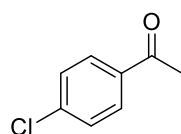

Colorless oil.<sup>1</sup> 89% yield (137.59 mg, 0.89 mmol). <sup>1</sup>H NMR (500 MHz, CDCl<sub>3</sub>, ppm):  $\delta$  7.89 (d,  $J$  = 8.5 Hz, 2H, ArH), 7.43 (d,  $J$  = 8.5 Hz, 2H, ArH), 2.58 (s, 3H, CH<sub>3</sub>). <sup>13</sup>C{<sup>1</sup>H} NMR (125 MHz, CDCl<sub>3</sub>, ppm):  $\delta$  197.2 (C=O), 139.9, 135.8, 130.1, 129.3 (ArC), 26.9 (CH<sub>3</sub>).

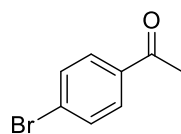

White solid.<sup>1</sup> M.p.: 48–50 °C. 85% yield (169.19 mg, 0.85 mmol). <sup>1</sup>H NMR (500 MHz, CDCl<sub>3</sub>, ppm):  $\delta$  7.81 (d,  $J$  = 8.5 Hz, 2H ArH), 7.59 (d,  $J$  = 8.5 Hz, 2H, ArH), 2.58 (s, 3H, CH<sub>3</sub>). <sup>13</sup>C{<sup>1</sup>H} NMR (125 MHz, CDCl<sub>3</sub>, ppm):  $\delta$  197.4 (C=O), 136.2, 132.3, 130.2, 128.7 (ArC), 26.9 (CH<sub>3</sub>).

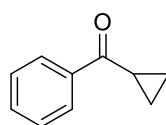

Colorless oil.<sup>3</sup> 95% yield (138.89 mg, 0.95 mmol). <sup>1</sup>H NMR (500 MHz, CDCl<sub>3</sub>, ppm): δ 8.02 (d, *J* = 7.5 Hz, 2H, Ar*H*), 7.56 (t, *J* = 7.5 Hz, 1H, Ar*H*), 7.47 (t, *J* = 7.5 Hz, 2H, Ar*H*), 2.70–2.66 (m, 1H, CH), 1.26–1.23 (m, 2H, CH<sub>2</sub>), 1.06–1.02 (m, 2H, CH<sub>2</sub>). <sup>13</sup>C{<sup>1</sup>H} NMR (125 MHz, CDCl<sub>3</sub>, ppm): δ 201.1 (C=O), 138.4, 133.1, 128.9, 128.4 (ArC), 17.5 (CH), 12.0 (CH<sub>2</sub>).

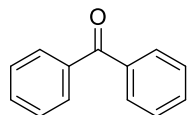

White solid.<sup>1</sup> M.p.: 52–53 °C. 92% yield (167.64 mg, 0.92 mmol). <sup>1</sup>H NMR (500 MHz, CDCl<sub>3</sub>, ppm): δ 7.81 (d, *J* = 7.0 Hz, 4H, Ar*H*), 7.60 (t, *J* = 7.5 Hz, 2H, Ar*H*), 7.49 (t, *J* = 7.5 Hz, 4H, Ar*H*). <sup>13</sup>C{<sup>1</sup>H} NMR (126 MHz, CDCl<sub>3</sub>, ppm): δ 197.2 (C=O), 138.0, 132.8, 130.5, 128.7 (ArC).

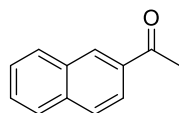

Colorless oil.<sup>1</sup> 90% yield (153.18 mg, 0.90 mmol). <sup>1</sup>H NMR (500 MHz, CDCl<sub>3</sub>, ppm): δ 8.48 (s, 1H, Ar*H*), 8.04 (dd, *J* = 1.5, 8.5 Hz, 1H, Ar*H*), 7.97 (d, *J* = 8.0 Hz, 1H, Ar*H*), 7.89 (t, *J* = 8.5 Hz, 2H, Ar*H*), 7.62–7.55 (m, 2H, Ar*H*), 2.74 (s, 3H, CH<sub>3</sub>). <sup>13</sup>C{<sup>1</sup>H} NMR (125 MHz, CDCl<sub>3</sub>, ppm): δ 198.5 (C=O), 136.0, 134.9, 132.9, 130.6, 129.9, 128.9, 128.8, 128.2, 127.2, 124.3 (ArC), 27.1 (CH<sub>3</sub>).

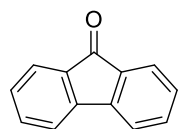

Yellow solid.<sup>2</sup> M.p.: 81–82 °C. 94% yield (169.39 mg, 0.94 mmol). <sup>1</sup>H NMR (500 MHz, CDCl<sub>3</sub>, ppm): δ 7.61 (d, *J* = 7.5 Hz, 2H), 7.47 (d, *J* = 7.5 Hz, 2H), 7.43 (t, *J* = 7.5 Hz, 2H), 7.23 (t, *J* = 7.5 Hz, 2H). <sup>13</sup>C{<sup>1</sup>H} NMR (125 MHz, CDCl<sub>3</sub>, ppm): δ 194.3 (C=O), 144.8, 135.1, 134.5, 129.5, 124.7, 120.7 (ArC).

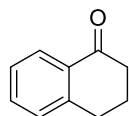

Colorless oil.<sup>2</sup> 96% yield (140.35 mg, 0.96 mmol). <sup>1</sup>H NMR (500 MHz, CDCl<sub>3</sub>, ppm): δ 8.04 (d, *J* = 7.5 Hz, 1H, Ar*H*), 7.47 (t, *J* = 7.5 Hz, 1H, Ar*H*), 7.31 (t, *J* = 7.5 Hz, 1H, Ar*H*), 7.25 (d, *J* = 7.5 Hz, 1H, Ar*H*), 2.97 (t, *J* = 6.0 Hz, 2H, CH<sub>2</sub>), 2.66 (t, *J* = 6.0 Hz, 2H, CH<sub>2</sub>), 2.17–2.12 (m, 2H, CH<sub>2</sub>). <sup>13</sup>C{<sup>1</sup>H} NMR (125 MHz, CDCl<sub>3</sub>, ppm): δ 198.9 (C=O), 144.9, 133.8, 133.0, 129.2, 127.6, 127.0 (ArC), 39.6, 30.1, 23.7 (CH<sub>2</sub>).



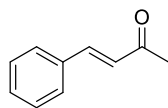

Colorless oil.<sup>4</sup> 84% yield (122.80 mg, 0.84 mmol). <sup>1</sup>H NMR (500 MHz, CDCl<sub>3</sub>, ppm): δ 7.56–7.50 (m, 2H, ArH), 7.41 (d, *J* = 16.0 Hz, 1H, ArCH=CH), 7.41 (t, *J* = 3.5 Hz, 3H, ArH), 6.73 (d, *J* = 16.0 Hz, 1H, CH), 2.39 (s, 3H, CH<sub>3</sub>). <sup>13</sup>C{<sup>1</sup>H} NMR (125 MHz, CDCl<sub>3</sub>, ppm): δ 198.5 (C=O), 143.5 (ArCH=CH), 134.4, 130.6, 129.0, 128.3, 127.2 (CH), 27.6 (CH<sub>3</sub>).

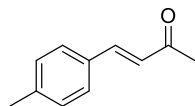

Colorless oil.<sup>5</sup> 81% yield (129.76 mg, 0.81 mmol). <sup>1</sup>H NMR (500 MHz, CDCl<sub>3</sub>, ppm): δ 7.49 (d, *J* = 16.5 Hz, 1H, ArCH=CH), 7.44 (d, *J* = 8.0 Hz, 2H, ArH), 7.21 (d, *J* = 8.0 Hz, 2H, ArH), 6.68 (d, *J* = 16.5 Hz, 1H, CH), 2.38 (s, 3H, CH<sub>3</sub>), 2.37 (s, 3H, CH<sub>3</sub>). <sup>13</sup>C{<sup>1</sup>H} NMR (125 MHz, CDCl<sub>3</sub>, ppm): δ 198.9 (C=O), 143.9 (ArCH=CH), 141.4, 132.0, 130.1, 128.7, 126.6 (CH), 27.8 (CH<sub>3</sub>), 21.9 (CH<sub>3</sub>).

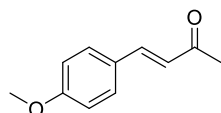

Colorless oil.<sup>5</sup> M.p.: 70–72 °C. 80% yield (140.96 mg, 0.80 mmol). <sup>1</sup>H NMR (500 MHz, CDCl<sub>3</sub>, ppm): δ 7.49 (d, *J* = 7.5 Hz, 2H, ArH), 7.47 (d, *J* = 16.5 Hz, 1H, ArCH=CH), 6.91 (d, *J* = 9.0 Hz, 2H, ArH), 6.60 (d, *J* = 16.5 Hz, 1H, CH), 3.84 (s, 3H, OCH<sub>3</sub>), 2.36 (s, 3H, CH<sub>3</sub>). <sup>13</sup>C{<sup>1</sup>H} NMR (125 MHz, CDCl<sub>3</sub>, ppm): δ 198.8 (C=O), 162.0, 143.6 (ArCH=CH), 130.3, 127.4, 125.4 (CH), 114.8, 55.8 (OCH<sub>3</sub>), 27.8 (CH<sub>3</sub>).

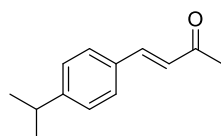

Colorless oil.<sup>1</sup> 78% yield (146.85 mg, 0.78 mmol). <sup>1</sup>H NMR (500 MHz, CDCl<sub>3</sub>, ppm): δ 7.52–7.47 (m, 3H, ArCH=CH and ArH), 7.26 (d, *J* = 8.5 Hz, 2H, ArH), 6.69 (d, *J* = 16.5 Hz, 1H, CH), 2.93 (sept, *J* = 6.5 Hz, 1H, CH(CH<sub>3</sub>)<sub>2</sub>), 2.38 (s, 3H, CH<sub>3</sub>), 1.26 (d, *J* = 6.5 Hz, 6H, CH(CH<sub>3</sub>)<sub>2</sub>). <sup>13</sup>C{<sup>1</sup>H} NMR (125 MHz, CDCl<sub>3</sub>, ppm): δ 198.9 (C=O), 152.3, 143.9 (ArCH=CH), 132.4, 128.8, 127.5, 126.7 (CH), 34.5 (CH(CH<sub>3</sub>)<sub>2</sub>), 27.8 (CH<sub>3</sub>), 24.1 (CH(CH<sub>3</sub>)<sub>2</sub>).

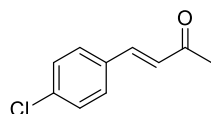

White solid.<sup>6</sup> M.p.: 54–56 °C. 44% yield (79.46 mg, 0.44 mmol). <sup>1</sup>H NMR (500 MHz, CDCl<sub>3</sub>, ppm): δ 7.48–7.44 (m, 3H, ArCH=CH and ArH), 7.37 (d, *J* = 8.5 Hz, 2H, ArH), 6.68 (d, *J* = 16.5 Hz, 1H, CH), 2.37 (s, 3H, CH<sub>3</sub>). <sup>13</sup>C{<sup>1</sup>H} NMR (125 MHz, CDCl<sub>3</sub>, ppm): δ 198.5 (C=O), 142.3 (ArCH=CH), 136.8, 133.3, 129.8, 129.6, 127.8 (CH), 123.9, 28.1 (CH<sub>3</sub>).

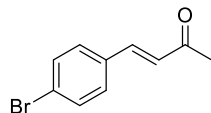

White solid.<sup>6</sup> M.p.: 78–79 °C. 48% yield (108.05 mg, 0.48 mmol). <sup>1</sup>H NMR (500 MHz, CDCl<sub>3</sub>, ppm): δ 7.53 (d, *J* = 8.5 Hz, 2H, ArH), 7.43 (d, *J* = 16.5 Hz, 1H, ArCH=CH), 7.39 (d, *J* = 8.5 Hz, 2H, ArH), 6.70 (d, *J* = 16.5 Hz, 1H, CH), 2.37 (s, 3H, CH<sub>3</sub>). <sup>13</sup>C{<sup>1</sup>H} NMR (125 MHz, CDCl<sub>3</sub>, ppm): δ 198.5 (C=O), 142.3 (ArCH=CH), 133.7, 132.6, 130.0, 127.9 (CH), 125.2, 28.1 (CH<sub>3</sub>).

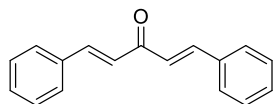

Yellow solid.<sup>7</sup> M.p.: 112–113 °C. 62% yield (58.11 mg, 0.25 mmol). <sup>1</sup>H NMR (500 MHz, CDCl<sub>3</sub>, ppm): δ 7.75 (d, *J* = 16.0 Hz, 2H, ArCH=CH), 7.63–7.61 (m, 4H, ArH), 7.42–7.41 (m, 6H, ArH), 7.10 (d, *J* = 16.0 Hz, 2H, ArCH=CH). <sup>13</sup>C{<sup>1</sup>H} NMR (125 MHz, CDCl<sub>3</sub>, ppm): δ 189.3 (C=O), 143.7 (ArC=CH), 135.2, 130.9, 129.4, 128.8 (ArC), 125.8 (ArC=CH).

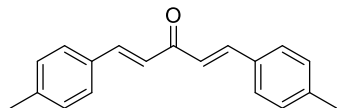

Yellow solid.<sup>7</sup> M.p.: 172–174 °C. 65% yield (68.20 mg, 0.26 mmol). <sup>1</sup>H NMR (500 MHz, CDCl<sub>3</sub>, ppm): δ 7.72 (d, *J* = 15.5 Hz, 2H, ArCH=CH), 7.52 (d, *J* = 8.0 Hz, 4H, ArH), 7.22 (d, *J* = 8.0 Hz, 4H, ArH), 7.04 (d, *J* = 15.5 Hz, 2H, ArCH=CH), 2.39 (s, 6H, CH<sub>3</sub>). <sup>13</sup>C{<sup>1</sup>H} NMR (125 MHz, CDCl<sub>3</sub>, ppm): δ 189.5 (C=O), 143.6 (ArC=CH), 141.4, 132.5, 130.1, 128.8 (ArC), 125.0 (ArC=CH), 21.9 (CH<sub>3</sub>).

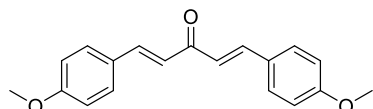

Yellow solid.<sup>7</sup> M.p.: 124–125 °C. 61% yield (71.81 mg, 0.24 mmol). <sup>1</sup>H NMR (500 MHz, CDCl<sub>3</sub>, ppm): δ 7.70 (d, *J* = 16.0 Hz, 2H, ArCH=CH), 7.57 (d, *J* = 8.5 Hz, 4H, ArH), 6.95 (d, *J* = 16.0 Hz, 2H, ArCH=CH), 6.93 (d, *J* = 8.5 Hz, 4H, ArH), 3.86 (s,

6H,  $\text{CH}_3$ ).  $^{13}\text{C}\{^1\text{H}\}$  NMR (125 MHz,  $\text{CDCl}_3$ , ppm):  $\delta$  189.3 (C=O), 161.9, 143.1 (ArC=CH), 130.5, 128.0, 123.9 (ArC=CH), 114.8 (ArC), 55.8 ( $\text{OCH}_3$ ).

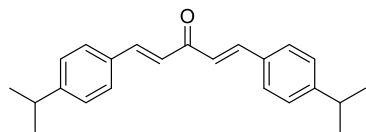

Yellow solid. M.p.: 73–75 °C. 38% yield (48.41 mg, 0.15 mmol).  $^1\text{H}$  NMR (500 MHz,  $\text{CDCl}_3$ , ppm):  $\delta$  7.72 (d,  $J$  = 16.0 Hz, 2H, ArCH=CH), 7.56 (d,  $J$  = 8.0 Hz, 4H, ArH), 7.27 (d,  $J$  = 8.0 Hz, 4H, ArH), 7.04 (d,  $J$  = 16.0 Hz, 4H, ArCH=CH), 2.94 (sept,  $J$  = 7.0 Hz, 2H,  $\text{CH}(\text{CH}_3)_2$ ), 1.27 (d,  $J$  = 7.0 Hz, 12H,  $\text{CH}_3$ ).  $^{13}\text{C}\{^1\text{H}\}$  NMR (125 MHz,  $\text{CDCl}_3$ , ppm):  $\delta$  189.5 (C=O), 152.2, 143.6 (ArC=CH), 132.9, 128.9, 127.5 (ArC), 125.1 (ArC=CH), 34.5 ( $\text{CH}(\text{CH}_3)_2$ ), 24.2 ( $\text{CH}_3$ ). HRMS (APCI): calcd for  $\text{C}_{23}\text{H}_{26}\text{O}$   $[\text{M}+\text{H}]^+$ : 319.2056, found 319.2055.

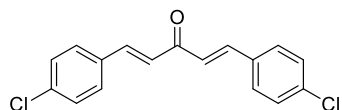

Yellow solid.<sup>8</sup> M.p.: 171–172 °C. 43% yield (52.15 mg, 0.17 mmol).  $^1\text{H}$  NMR (500 MHz,  $\text{CDCl}_3$ , ppm):  $\delta$  7.67 (d,  $J$  = 16.0 Hz, 2H, ArCH=CH), 7.55 (d,  $J$  = 8.5 Hz, 4H, ArH), 7.47 (d,  $J$  = 8.5 Hz, 4H, ArH), 7.05 (d,  $J$  = 16.0 Hz, 2H, ArCH=CH).  $^{13}\text{C}\{^1\text{H}\}$  NMR (125 MHz,  $\text{CDCl}_3$ , ppm):  $\delta$  188.7 (C=O), 142.5 (ArC=CH), 134.0, 132.6, 130.1, 126.1 (ArC=CH), 125.3 (ArC).

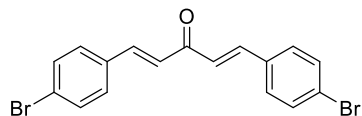

Yellow solid.<sup>8</sup> M.p.: 189–191 °C. 45% yield (70.58 mg, 0.18 mmol).  $^1\text{H}$  NMR (500 MHz,  $\text{CDCl}_3$ , ppm):  $\delta$  7.69 (d,  $J$  = 16.0 Hz, 2H, ArCH=CH), 7.55 (d,  $J$  = 8.5 Hz, 4H, ArH), 7.39 (d,  $J$  = 8.5 Hz, 4H, ArH), 7.03 (d,  $J$  = 16.0 Hz, 2H, ArCH=CH).  $^{13}\text{C}\{^1\text{H}\}$  NMR (125 MHz,  $\text{CDCl}_3$ , ppm):  $\delta$  188.7 (C=O), 142.5 (ArC=CH), 134.0, 132.6, 130.1, 126.1 (ArC=CH), 125.3 (ArC).

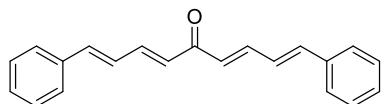

Yellow solid. M.p.: 134–136 °C. 50% yield (57.28 mg, 0.20 mmol).  $^1\text{H}$  NMR (500 MHz,  $\text{CDCl}_3$ , ppm):  $\delta$  7.48 (t,  $J$  = 7.0 Hz, 6H, ArH), 7.39–7.31 (m, 6H, ArH and CH), 7.01–6.92 (m, 4H, CH), 6.57 (d,  $J$  = 15.5 Hz, 2H, CH).  $^{13}\text{C}\{^1\text{H}\}$  NMR (125 MHz,  $\text{CDCl}_3$ , ppm):  $\delta$  189.4 (C=O), 143.4 (CH), 141.8 (CH), 136.5 (CH), 129.6, 129.4

(CH), 129.2, 127.6 (ArC), 127.4 (CH). HRMS (APCI): calcd for C<sub>21</sub>H<sub>18</sub>O [M+H]<sup>+</sup>: 287.1430, found 287.1426.

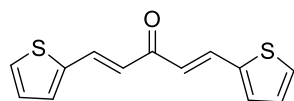

Yellow solid.<sup>8</sup> M.p.: 116–117 °C. 47% yield (46.30 mg, 0.19 mmol). <sup>1</sup>H NMR (500 MHz, CDCl<sub>3</sub>, ppm): δ 7.85 (d, *J* = 16.0 Hz, 2H, CH=CHCO), 7.41 (d, *J* = 5.0 Hz, 2H), 7.34 (d, *J* = 3.0 Hz, 2H), 7.08 (dd, *J* = 3.0, 5.0 Hz, 2H, thiopheneH), 6.82 (d, *J* = 16.0 Hz, 2H, CH=CHCO). <sup>13</sup>C{<sup>1</sup>H} NMR (125 MHz, CDCl<sub>3</sub>, ppm): δ 188.1 (C=O), 140.7, 136.0 (CH), 132.2, 129.2, 128.7 (thiopheneC), 124.8 (CH).

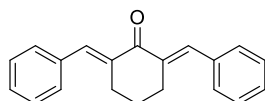

Yellow solid.<sup>9</sup> M.p.: 116–118 °C. 86% yield (94.37 mg, 0.34 mmol). <sup>1</sup>H NMR (500 MHz, CDCl<sub>3</sub>, ppm): δ 7.81 (s, 2H, CH), 7.47 (d, *J* = 7.5 Hz, 4H), 7.41 (t, *J* = 7.5 Hz, 4H), 7.34 (t, *J* = 7.5 Hz, 2H, ArH), 2.94 (t, *J* = 5.0 Hz, 4H, CH<sub>2</sub>), 1.82–1.77 (m, 2H, CH<sub>2</sub>). <sup>13</sup>C{<sup>1</sup>H} NMR (125 MHz, CDCl<sub>3</sub>, ppm): δ 190.8 (C=O), 137.3 (CH), 136.6 (CH=C), 136.4, 130.8, 129.0, 128.8 (ArC), 28.9 (CH<sub>2</sub>), 23.4 (CH<sub>2</sub>).

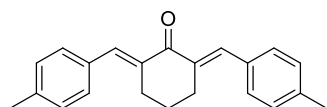

Yellow solid.<sup>9</sup> M.p.: 168–170 °C. 83% yield (100.39 mg, 0.33 mmol). <sup>1</sup>H NMR (500 MHz, CDCl<sub>3</sub>, ppm): δ 7.78 (s, 2H, CH), 7.38 (d, *J* = 8.0 Hz, 4H, ArH), 7.22 (d, *J* = 8.0 Hz, 4H, ArH), 2.93 (t, *J* = 5.0 Hz, 4H, CH<sub>2</sub>), 2.39 (s, 6H, CH<sub>3</sub>), 1.81–1.76 (m, 2H, CH<sub>2</sub>). <sup>13</sup>C{<sup>1</sup>H} NMR (125 MHz, CDCl<sub>3</sub>, ppm): δ 190.8 (C=O), 139.2, 137.3 (CH), 135.9 (CH=C), 133.6, 130.9, 129.5 (ArC), 28.9 (CH<sub>2</sub>), 23.4 (CH<sub>2</sub>), 21.8 (CH<sub>3</sub>).

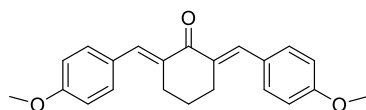

Yellow solid.<sup>9</sup> M.p.: 160–162 °C. 81% yield ((108.34 mg, 0.32 mmol). <sup>1</sup>H NMR (500 MHz, CDCl<sub>3</sub>, ppm): δ 7.76 (s, 2H, CH), 7.46 (d, *J* = 8.5 Hz, 4H, ArH), 6.94 (d, *J* = 8.5 Hz, 4H, ArH), 3.85 (s, 6H, CH<sub>3</sub>), 2.92 (t, *J* = 5.0 Hz, 4H, CH<sub>2</sub>), 1.83–1.78 (m, 2H, CH<sub>2</sub>). <sup>13</sup>C{<sup>1</sup>H} NMR (125 MHz, CDCl<sub>3</sub>, ppm): δ 190.7 (C=O), 160.3 (COMe), 136.9 (CH), 134.7 (CH=C), 132.6, 129.1, 114.3 (ArC), 55.7 (OCH<sub>3</sub>), 28.9 (CH<sub>2</sub>), 23.4 (CH<sub>2</sub>).

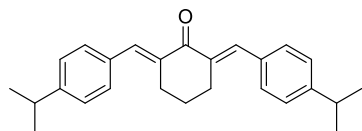

Yellow solid. M.p.: 149–150 °C. 65% yield (93.21 mg, 0.26 mmol). <sup>1</sup>H NMR (500 MHz, CDCl<sub>3</sub>, ppm): δ 7.80 (s, 2H, CH), 7.43 (d, *J* = 8.0 Hz, 4H, ArH), 7.27 (d, *J* = 8.0 Hz, 4H, ArH), 2.95–2.93 (m, 6H, CH<sub>2</sub> and CH(CH<sub>3</sub>)<sub>2</sub>), 1.81–1.76 (m, 2H, CH<sub>2</sub>), 1.27 (d, *J* = 7.0 Hz, 12H, CH<sub>3</sub>). <sup>13</sup>C{<sup>1</sup>H} NMR (125 MHz, CDCl<sub>3</sub>, ppm): δ 190.8 (C=O), 150.1, 137.3, 135.9 (CH), 134.0 (CH=C), 131.0, 126.9 (ArC), 34.4, 28.9, 24.2, 23.5. HRMS (APCI): calcd for C<sub>26</sub>H<sub>30</sub>O [M+H]<sup>+</sup>: 359.2369, found 359.2360.

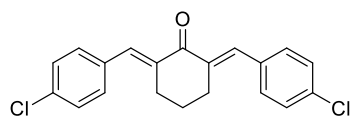

Yellow solid.<sup>9</sup> M.p.: 146–147 °C. 72% yield (98.84 mg, 0.29 mmol). <sup>1</sup>H NMR (500 MHz, CDCl<sub>3</sub>, ppm): δ 7.73 (s, 2H, CH), 7.40–7.35 (m, 8H, ArH), 2.89 (t, *J* = 5.0 Hz, 4H, CH<sub>2</sub>), 1.83–1.78 (m, 2H, CH<sub>2</sub>). <sup>13</sup>C{<sup>1</sup>H} NMR (125 MHz, CDCl<sub>3</sub>, ppm): δ 190.3 (C=O), 136.8 (CH=C), 136.2 (CH), 135.0, 134.7, 132.0, 129.1 (ArC), 28.8 (CH<sub>2</sub>), 23.2 (CH<sub>2</sub>).

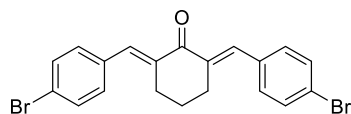

Yellow solid.<sup>10</sup> M.p.: 145–146 °C. 74% yield (127.90 mg, 0.30 mmol). <sup>1</sup>H NMR (500 MHz, CDCl<sub>3</sub>, ppm): δ 7.71 (s, 2H, CH), 7.53 (d, *J* = 8.5 Hz, 4H, ArH), 7.32 (d, *J* = 8.5 Hz, 4H, ArH), 2.88 (t, *J* = 5.0 Hz, 4H, CH<sub>2</sub>), 1.82–1.77 (m, 2H, CH<sub>2</sub>). <sup>13</sup>C{<sup>1</sup>H} NMR (125 MHz, CDCl<sub>3</sub>, ppm): δ 190.3 (C=O), 136.9 (CH=C), 136.2 (CH), 135.1, 132.2, 132.0, 123.3 (ArCBr), 28.8 (CH<sub>2</sub>), 23.2 (CH<sub>2</sub>).

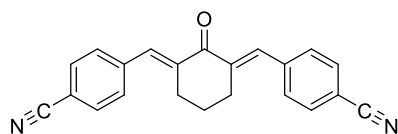

Yellow solid.<sup>10</sup> M.p.: 227–228 °C. 75% yield (97.32 mg, 0.30 mmol). <sup>1</sup>H NMR (500 MHz, CDCl<sub>3</sub>, ppm): δ 7.75 (s, 2H, CH), 7.70 (d, *J* = 8.0 Hz, 4H, ArH), 7.53 (d, *J* = 8.0 Hz, 4H, ArH), 2.91 (t, *J* = 5.0 Hz, 4H, CH<sub>2</sub>), 1.85–1.80 (m, 2H, CH<sub>2</sub>). <sup>13</sup>C{<sup>1</sup>H} NMR (125 MHz, CDCl<sub>3</sub>, ppm): δ 189.7 (C=O), 140.6, 138.6 (CH=C), 135.6 (CH), 132.5, 131.0 (ArC), 118.9 (CN), 112.4, 28.7 (CH<sub>2</sub>), 23.0 (CH<sub>2</sub>).

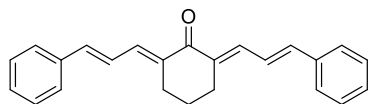

Yellow solid.<sup>9</sup> M.p.: 125–126 °C. 82% yield (107.06 mg, 0.33 mmol). <sup>1</sup>H NMR (500 MHz, CDCl<sub>3</sub>, ppm): δ 7.50 (t, *J* = 7.0 Hz, 6H, Ar*H*), 7.36 (t, *J* = 7.0 Hz, 4H, Ar*H*), 7.30 (t, *J* = 7.0 Hz, 2H, CH), 7.11–7.06 (m, 2H, CH), 6.98 (d, *J* = 15.5 Hz, 2H, CH), 2.81 (t, *J* = 5.5 Hz, 4H, CH<sub>2</sub>), 1.91–1.86 (m, 2H, CH<sub>2</sub>). <sup>13</sup>C{<sup>1</sup>H} NMR (125 MHz, CDCl<sub>3</sub>, ppm): δ 189.3 (C=O), 141.2, 137.1, 136.7, 135.8, 129.2, 129.1, 127.6 (ArC), 124.1, 27.0 (CH<sub>2</sub>), 22.5 (CH<sub>2</sub>).

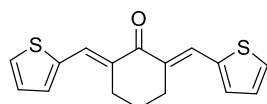

Yellow solid. M.p.: 153–154 °C. 79% yield (90.50 mg, 0.32 mmol). <sup>1</sup>H NMR (500 MHz, CDCl<sub>3</sub>, ppm): δ 8.00 (s, 2H, CH=C), 7.53 (d, *J* = 5.0 Hz, 2H, 5-thiophene*H*), 7.38 (d, *J* = 3.5 Hz, 2H, 3-thiophene*H*), 7.14 (t, *J* = 5.0 Hz, 2H, 4-thiophene*H*), 2.93 (t, *J* = 5.5 Hz, 4H, CH<sub>2</sub>), 2.00–1.95 (m, 2H, CH<sub>2</sub>). <sup>13</sup>C{<sup>1</sup>H} NMR (125 MHz, CDCl<sub>3</sub>, ppm): δ 189.5 (C=O), 139.9 (CH=C), 133.4 (CH), 133.2, 130.3, 130.1, 128.0 (thiopheneC), 28.5 (CH<sub>2</sub>), 22.0 (CH<sub>2</sub>). HRMS (APCI): calcd for C<sub>16</sub>H<sub>14</sub>OS<sub>2</sub> [M+H]<sup>+</sup>: 287.0559, found 289.0557.

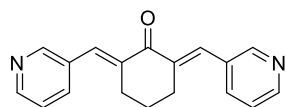

Yellow solid.<sup>11</sup> M.p.: 143–144 °C. 54% yield (59.68 mg, 0.22 mmol). <sup>1</sup>H NMR (500 MHz, CDCl<sub>3</sub>, ppm): δ 8.71 (s, 2H, CH=C), 8.57–8.56 (m, 2H), 7.62–7.76 (m, 4H), 7.36–7.34 (m, 2H, pyridine*H*), 2.94 (t, *J* = 5.0 Hz, 4H, CH<sub>2</sub>), 1.86–1.78 (m, 2H, CH<sub>2</sub>). <sup>13</sup>C{<sup>1</sup>H} NMR (125 MHz, CDCl<sub>3</sub>, ppm): δ 189.6 (C=O), 151.6 (2-pyridineC), 149.7 (6-pyridineC), 138.1 (CH=C), 137.4 (CH), 134.0, 132.0, 123.7 (pyridineC), 28.7 (CH<sub>2</sub>), 23.1 (CH<sub>2</sub>).

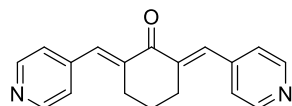

Yellow solid.<sup>11</sup> M.p.: 147–149 °C. 67% yield (74.05 mg, 0.27 mmol). <sup>1</sup>H NMR (500 MHz, CDCl<sub>3</sub>, ppm): δ 8.65 (d, *J* = 5.5 Hz, 4H, 2-pyridine*H*), 7.65 (s, 2H, CH), 7.27 (d, *J* = 5.5 Hz, 4H, 3-pyridine*H*), 2.91 (t, *J* = 5.0 Hz, 4H, CH<sub>2</sub>), 1.84–1.79 (m, 2H, CH<sub>2</sub>). <sup>13</sup>C{<sup>1</sup>H} NMR (125 MHz, CDCl<sub>3</sub>, ppm): δ 189.7 (C=O), 150.5 (2-pyridineC), 143.4

(4-pyridineC), 139.5 (CH=C), 134.8 (CH), 124.4 (3-pyridineC), 28.6 (CH<sub>2</sub>), 22.8 (CH<sub>2</sub>). HRMS (APCI): calcd for C<sub>18</sub>H<sub>16</sub>N<sub>2</sub>O [M+H]<sup>+</sup>: 277.1335, found 277.1345.

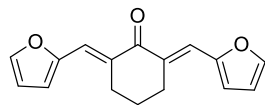

Yellow solid.<sup>9</sup> M.p.: 143–145 °C. 76% yield (77.30 mg, 0.30 mmol). <sup>1</sup>H NMR (500 MHz, CDCl<sub>3</sub>, ppm): δ 7.56 (d, *J* = 5.5 Hz, 4H, furan*H*), 6.67 (d, *J* = 3.5 Hz, 2H, furan*H*), 6.52 (s, 2H, CH=C), 3.01 (t, *J* = 5.5 Hz, 4H, CH<sub>2</sub>), 1.91–1.86 (m, 2H, CH<sub>2</sub>). <sup>13</sup>C{<sup>1</sup>H} NMR (125 MHz, CDCl<sub>3</sub>, ppm): δ 189.5 (C=O), 153.2 (2-furanC), 144.9 (5-furanC), 133.4 (CH=C), 123.7 (CH), 116.5, 112.7 (furanC), 28.4 (CH<sub>2</sub>), 22.0 (CH<sub>2</sub>).

### Copies of NMR spectra

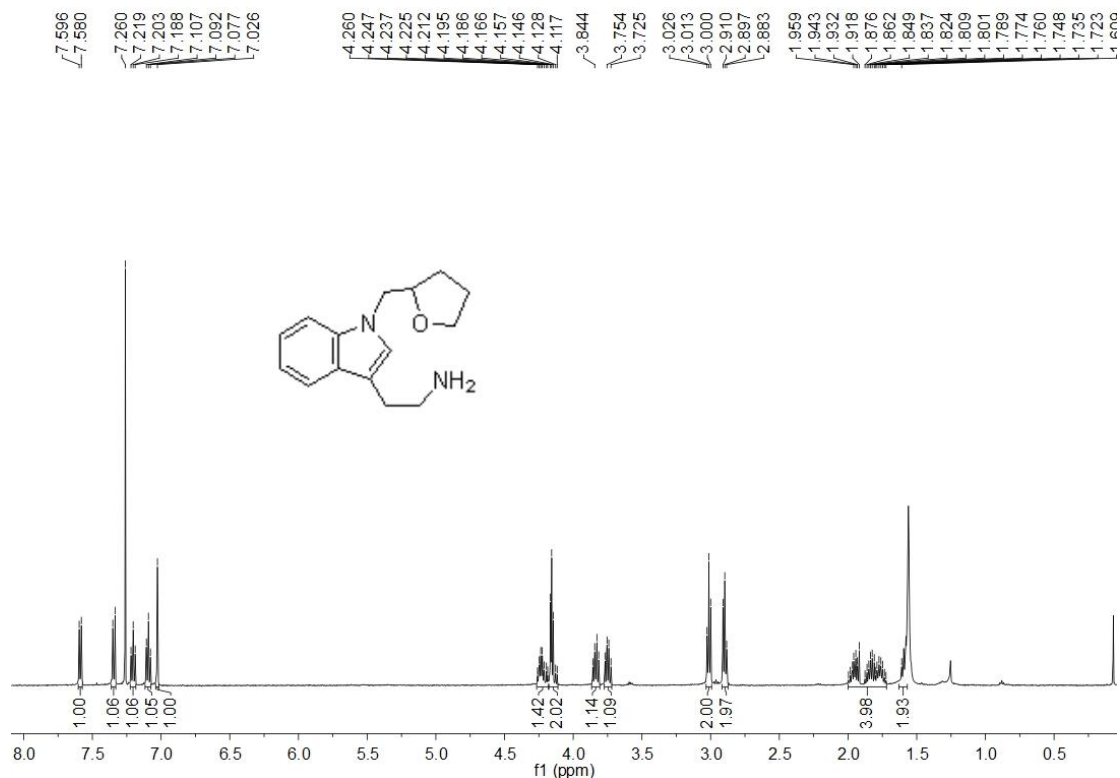

**Fig. S7** <sup>1</sup>H NMR spectrum of [1-CH<sub>2</sub>-(2-C<sub>4</sub>H<sub>7</sub>O)]-tryptamine (500 MHz, CDCl<sub>3</sub>)

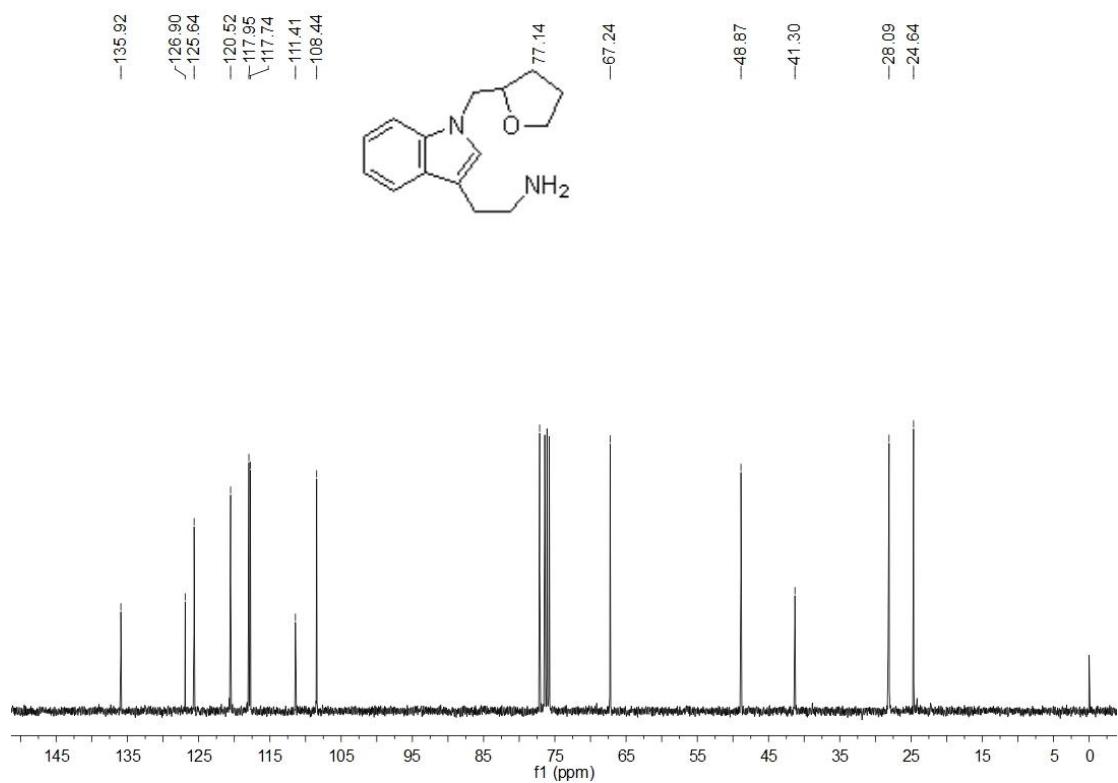

**Fig. S8**  $^{13}\text{C}\{^1\text{H}\}$  NMR spectrum of [1- $\text{CH}_2$ -(2- $\text{C}_4\text{H}_7\text{O}$ )]-tryptamine (125 MHz,  $\text{CDCl}_3$ )

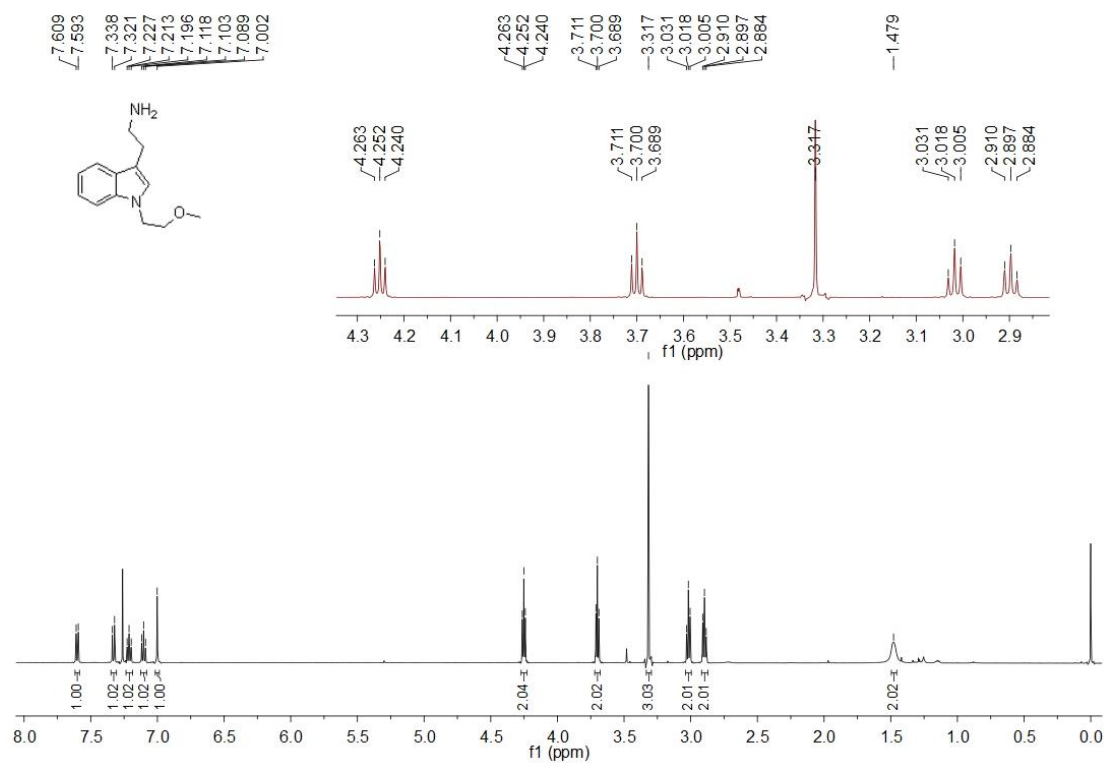

**Fig. S9**  $^1\text{H}$  NMR spectrum of [1-( $\text{CH}_2$ ) $_2$ OMe]-tryptamine (500 MHz,  $\text{CDCl}_3$ )



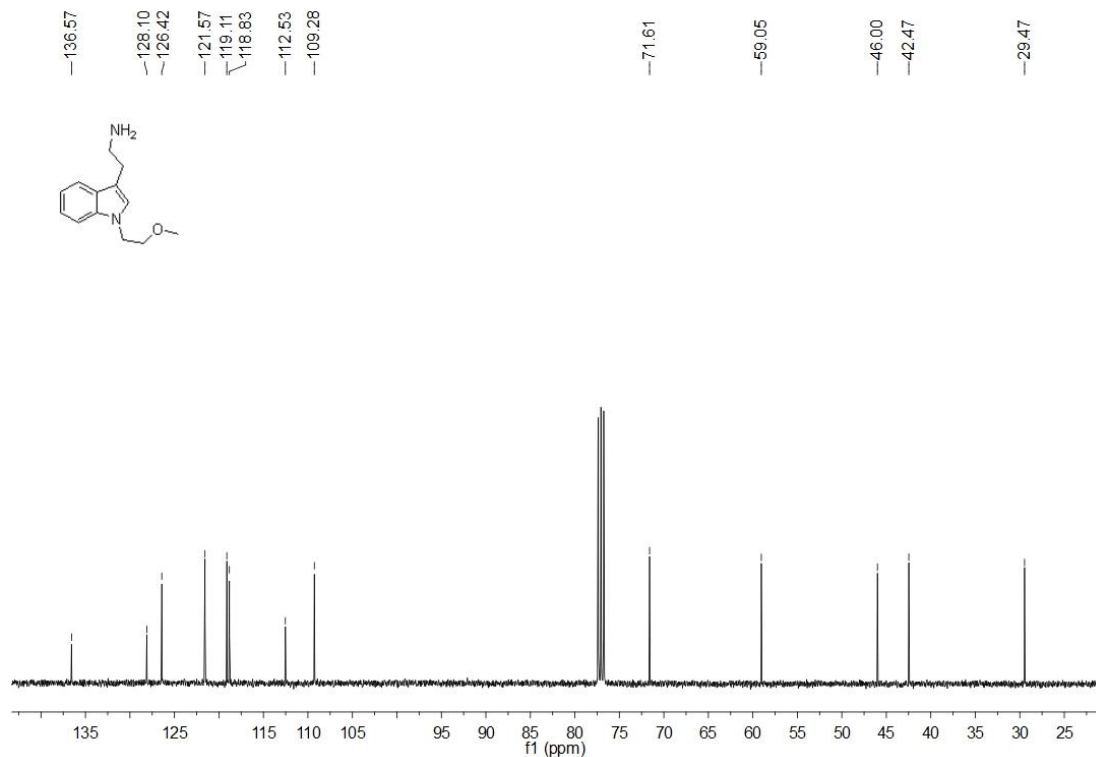

**Fig. S10**  $^{13}\text{C}\{^1\text{H}\}$  NMR spectrum of [1-(CH<sub>2</sub>)<sub>2</sub>OMe]-tryptamine (125 MHz, CDCl<sub>3</sub>)

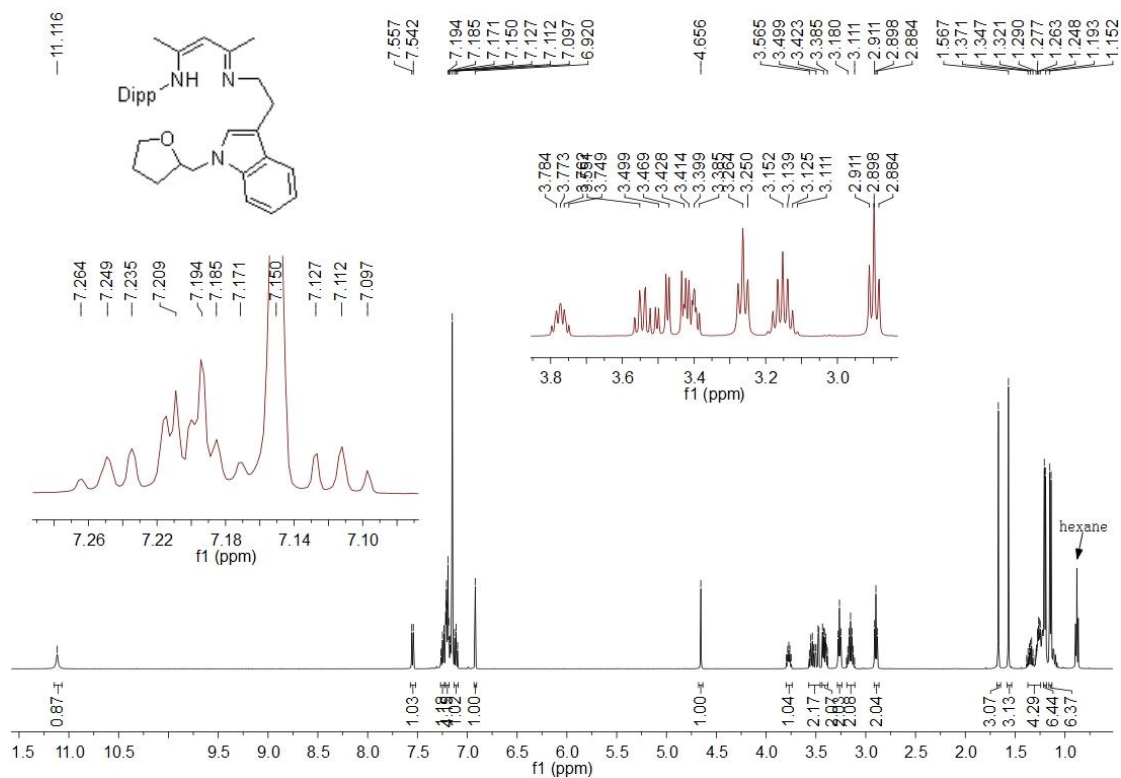

**Fig. S11**  $^1\text{H}$  NMR spectrum of the proligand H<sub>2</sub>L<sup>1</sup> (500 MHz, C<sub>6</sub>D<sub>6</sub>)

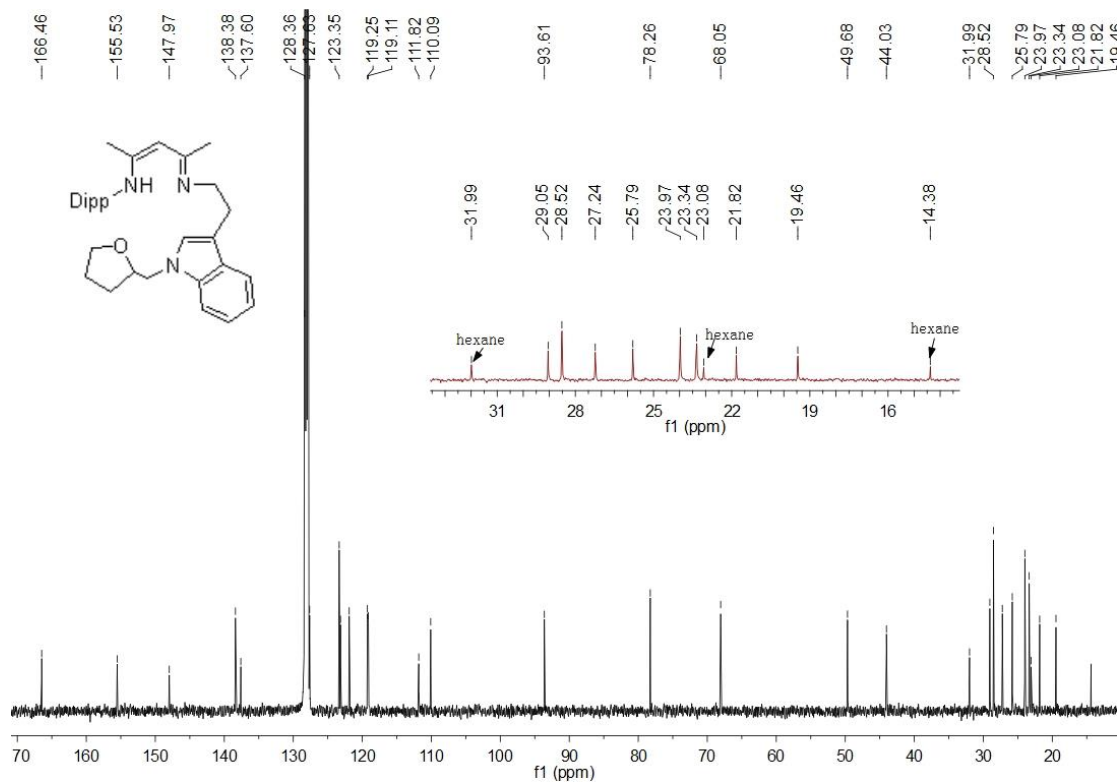

Fig. S12  $^{13}C\{^1H\}$  NMR spectrum of the proligand  $H_2L^1$  (125 MHz,  $C_6D_6$ )

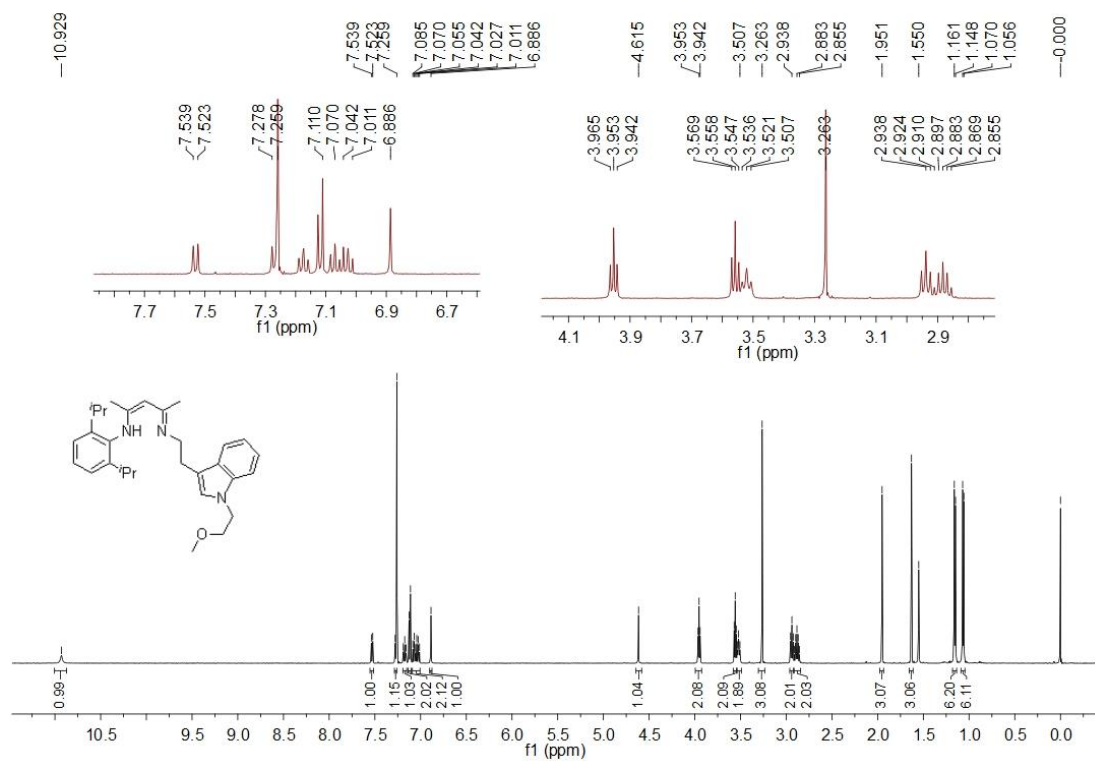

Fig. S13  $^1H$  NMR spectrum of the proligand  $H_2L^2$  (500 MHz,  $CDCl_3$ )

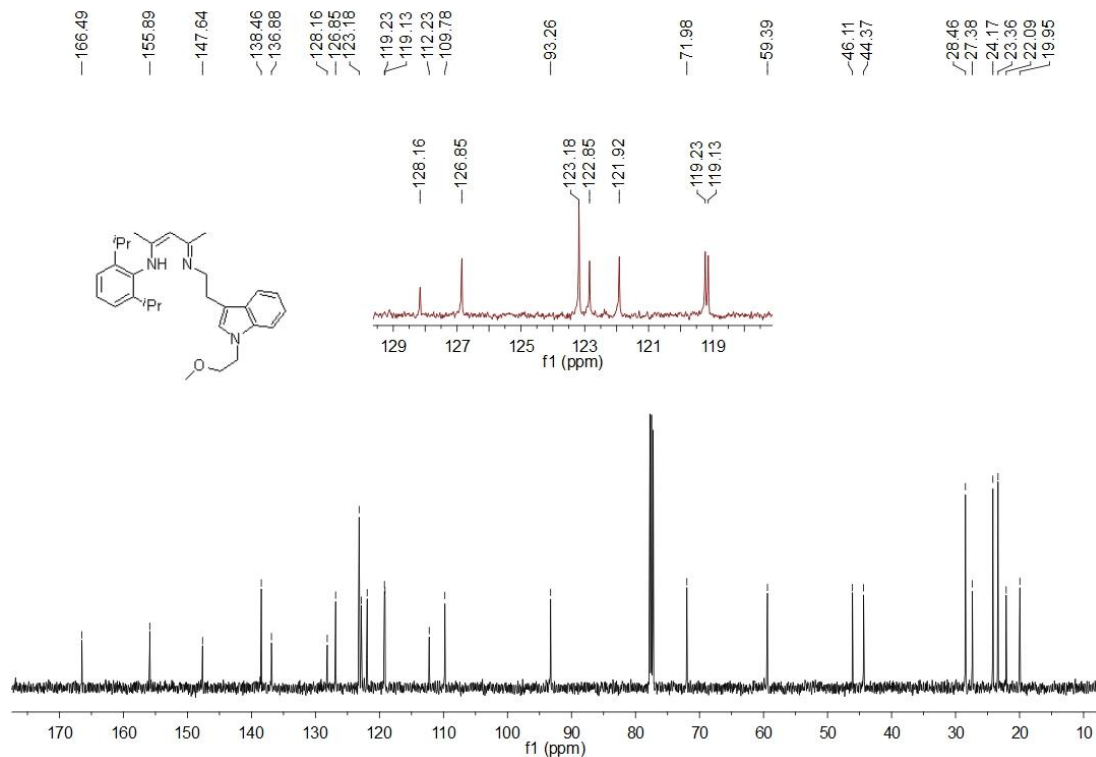

**Fig. S14**  $^{13}C\{^1H\}$  NMR spectrum of the proligand  $H_2L_2$  (125 MHz,  $CDCl_3$ )

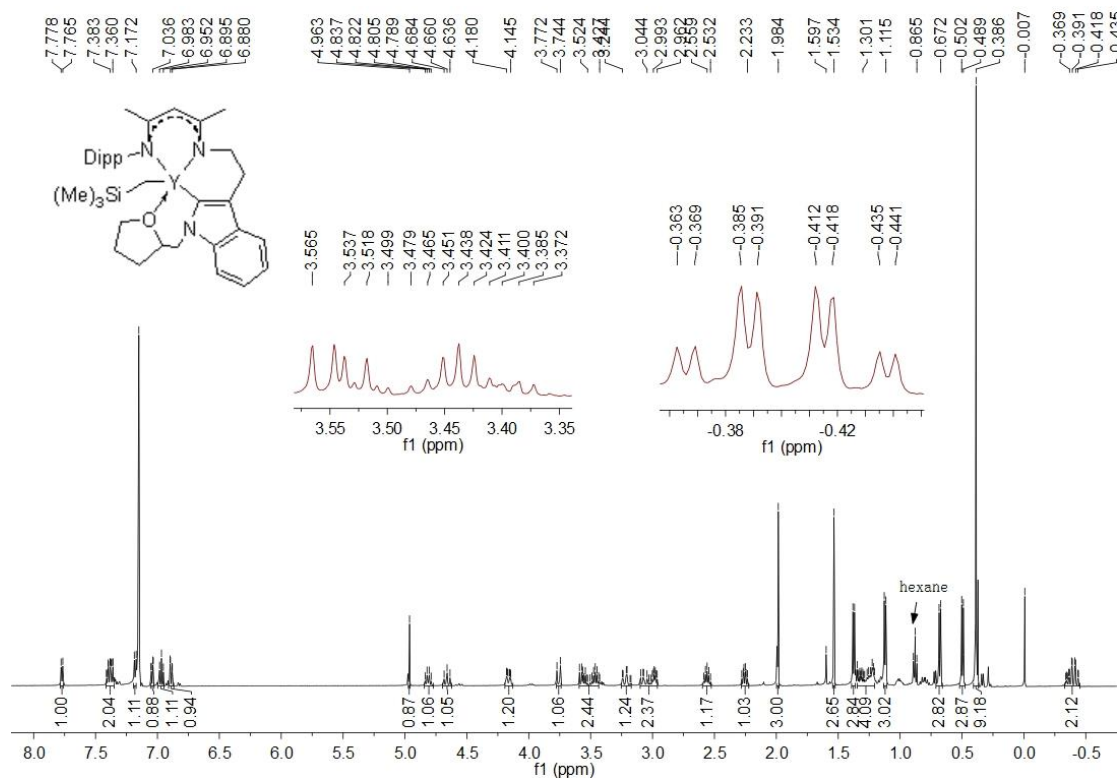

**Fig. S15**  $^1H$  NMR spectrum of the complex  $1a$  (500 MHz,  $C_6D_6$ )

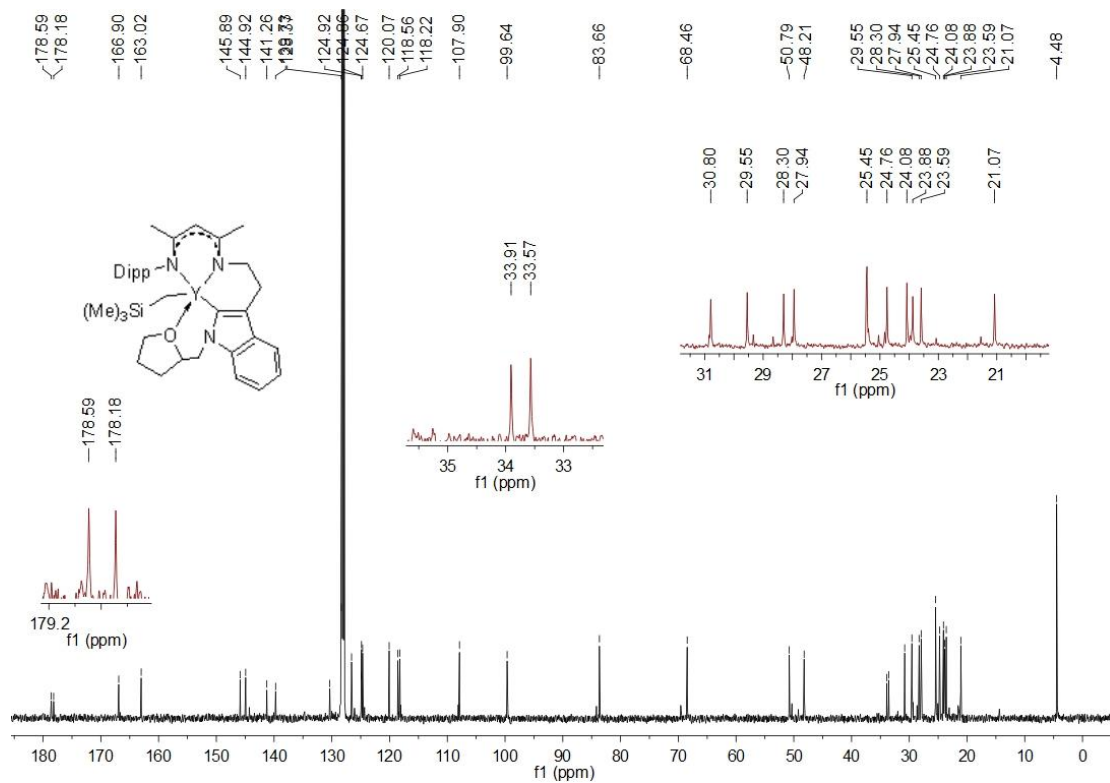

**Fig. S16**  $^{13}\text{C}\{^1\text{H}\}$  NMR spectrum of the complex **1a** (125 MHz,  $\text{C}_6\text{D}_6$ )

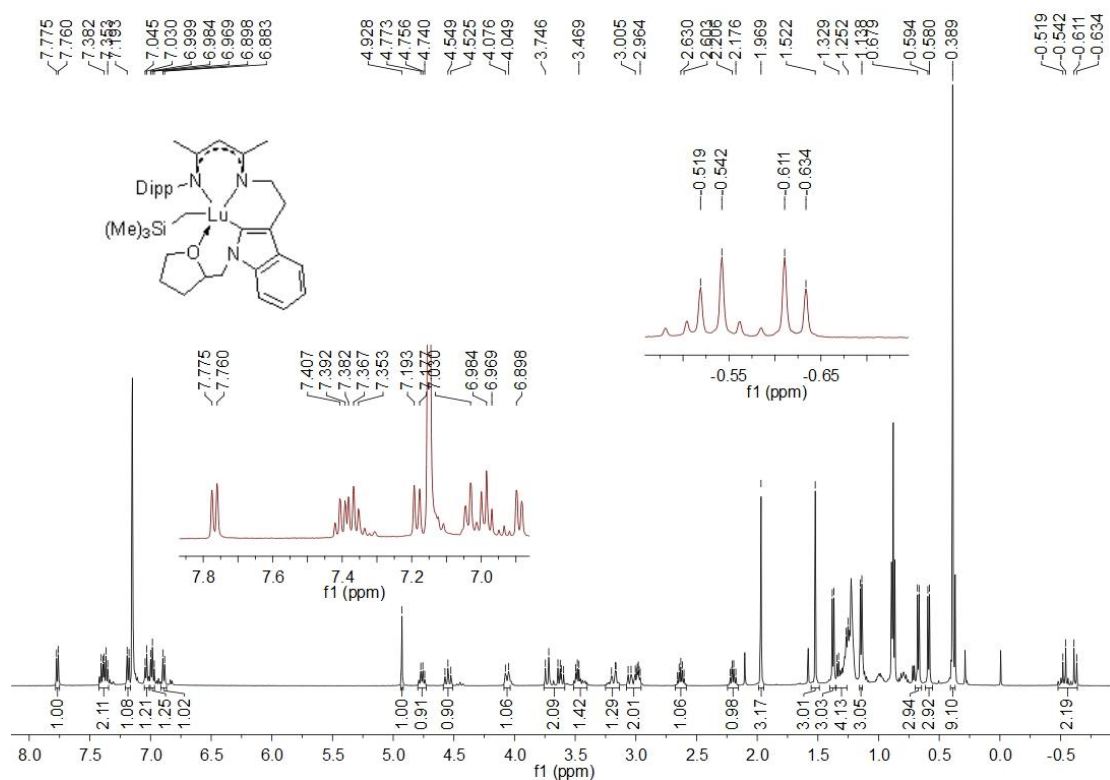

**Fig. S17**  $^1\text{H}$  NMR spectrum of the complex **1d** (500 MHz,  $\text{C}_6\text{D}_6$ )

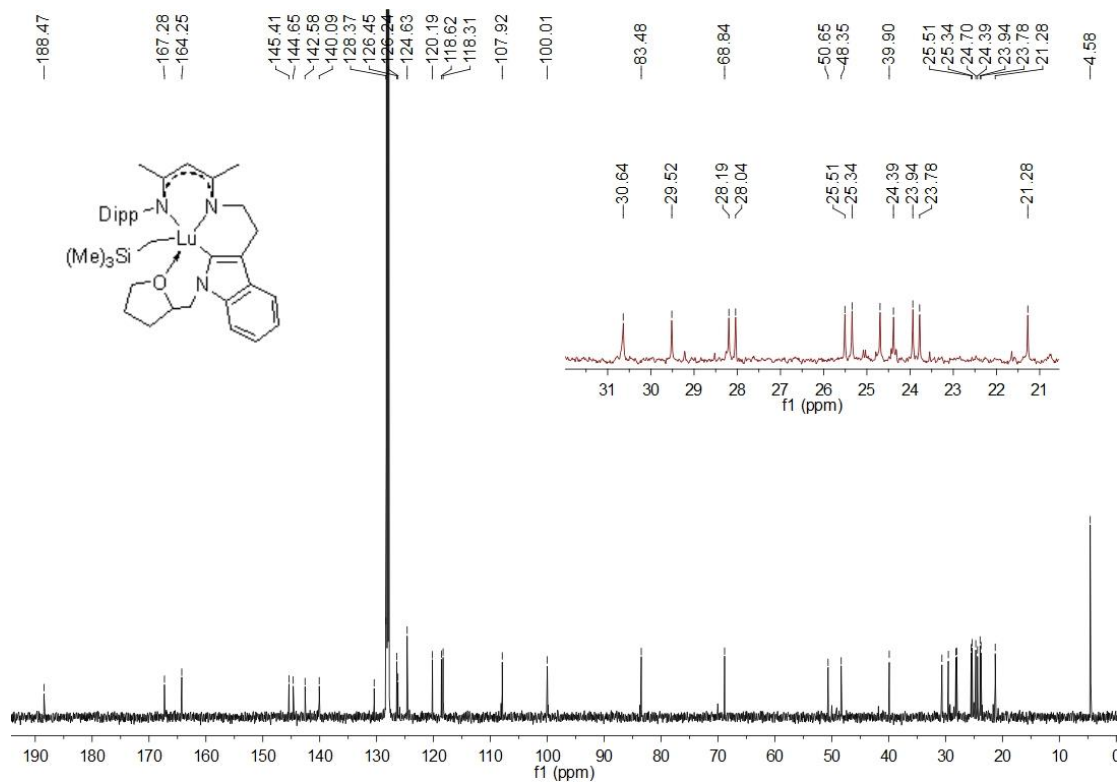

**Fig. S18**  $^{13}\text{C}\{^1\text{H}\}$  NMR spectrum of the complex **1d** (125 MHz,  $\text{C}_6\text{D}_6$ )

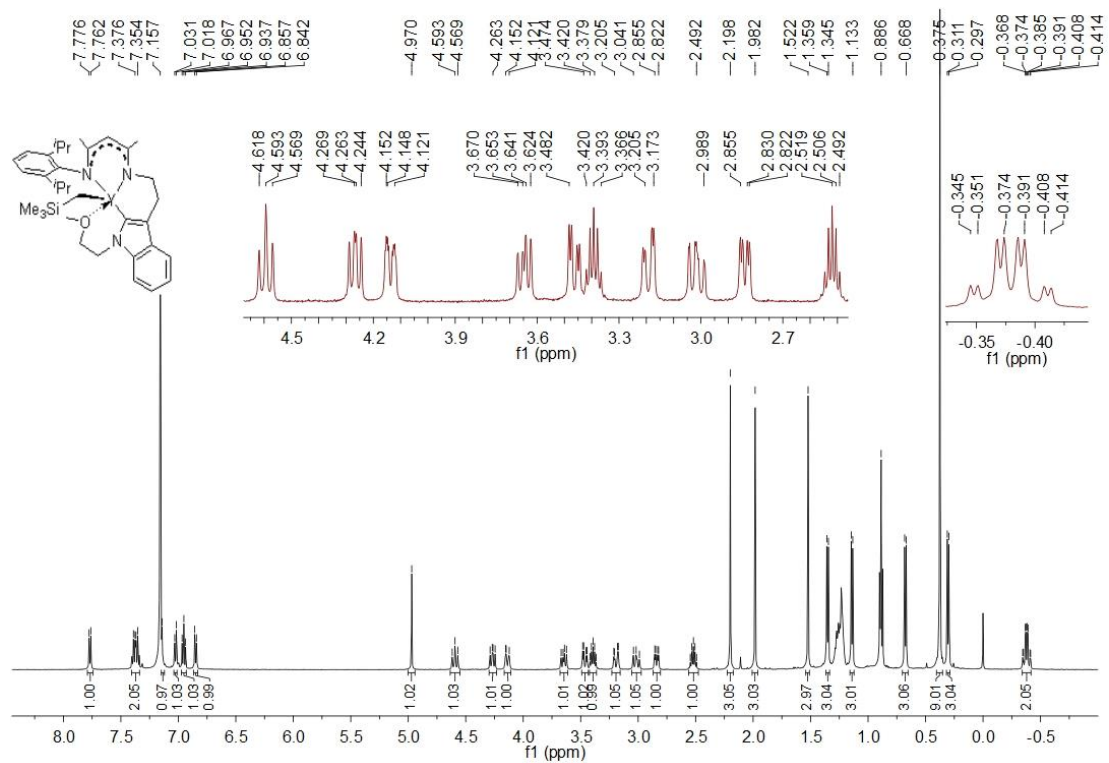

**Fig. S19**  $^1\text{H}$  NMR spectrum of the complex **2a** (500 MHz,  $\text{C}_6\text{D}_6$ )

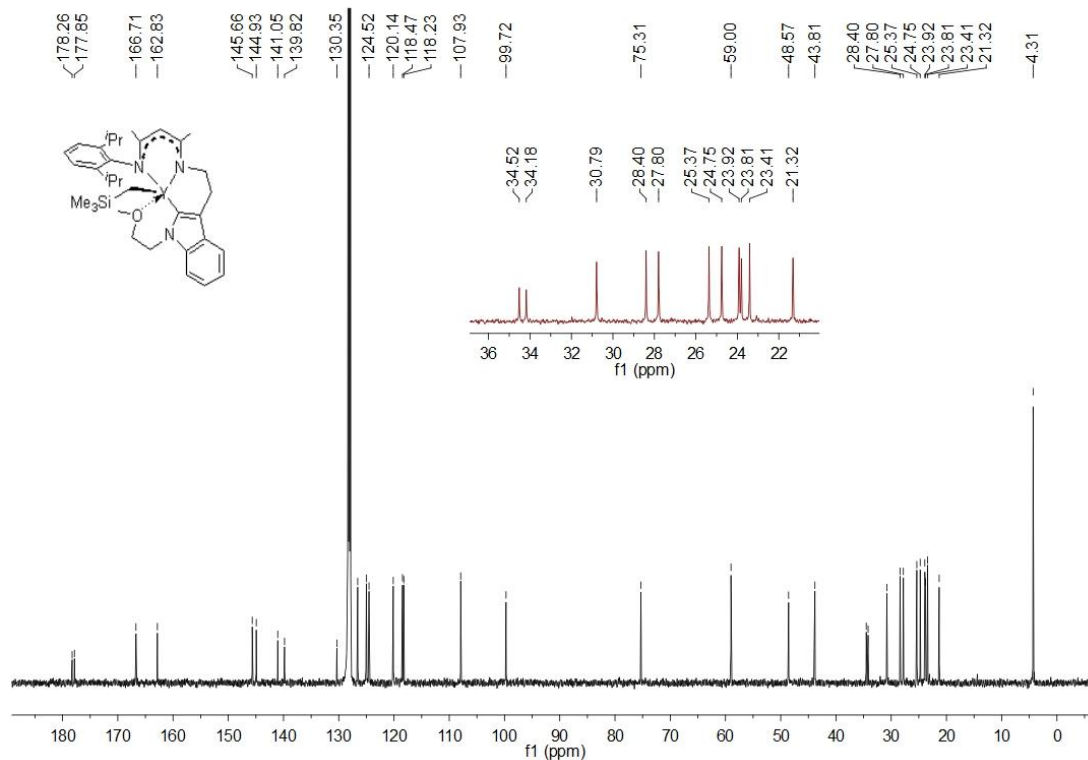

**Fig. S20** <sup>13</sup>C{<sup>1</sup>H} NMR spectrum of the complex **2a** (125 MHz, C<sub>6</sub>D<sub>6</sub>)

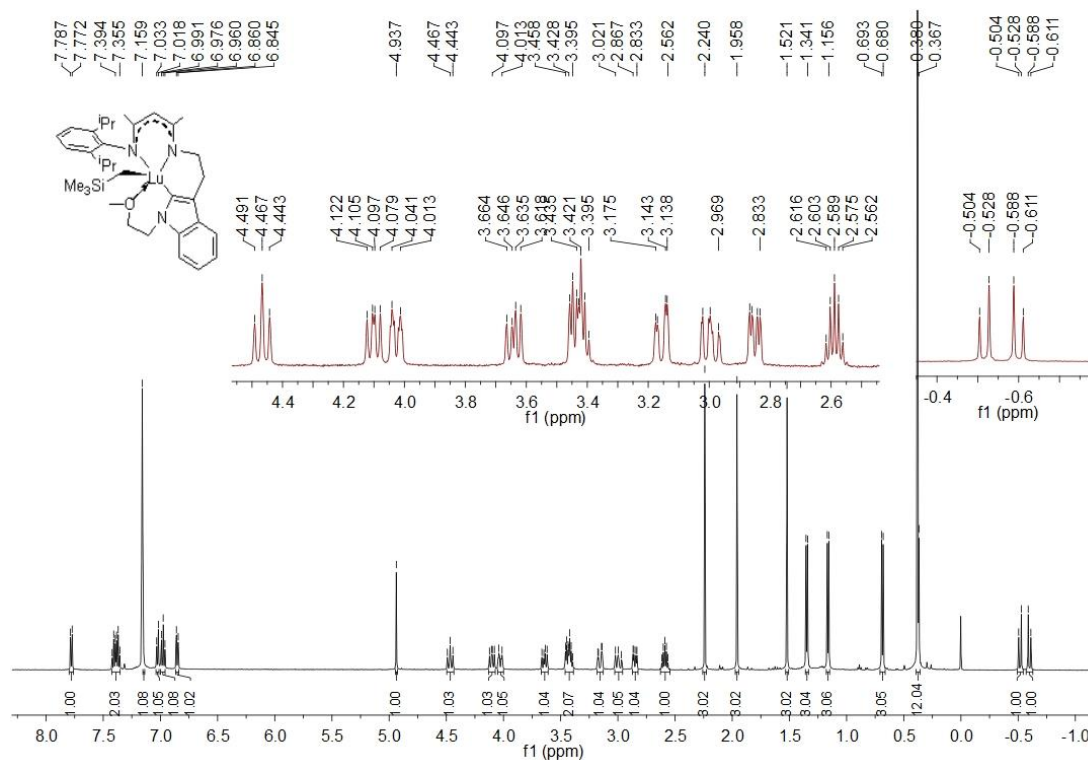

**Fig. S21** <sup>1</sup>H NMR spectrum of the complex **2d** (500 MHz, C<sub>6</sub>D<sub>6</sub>)



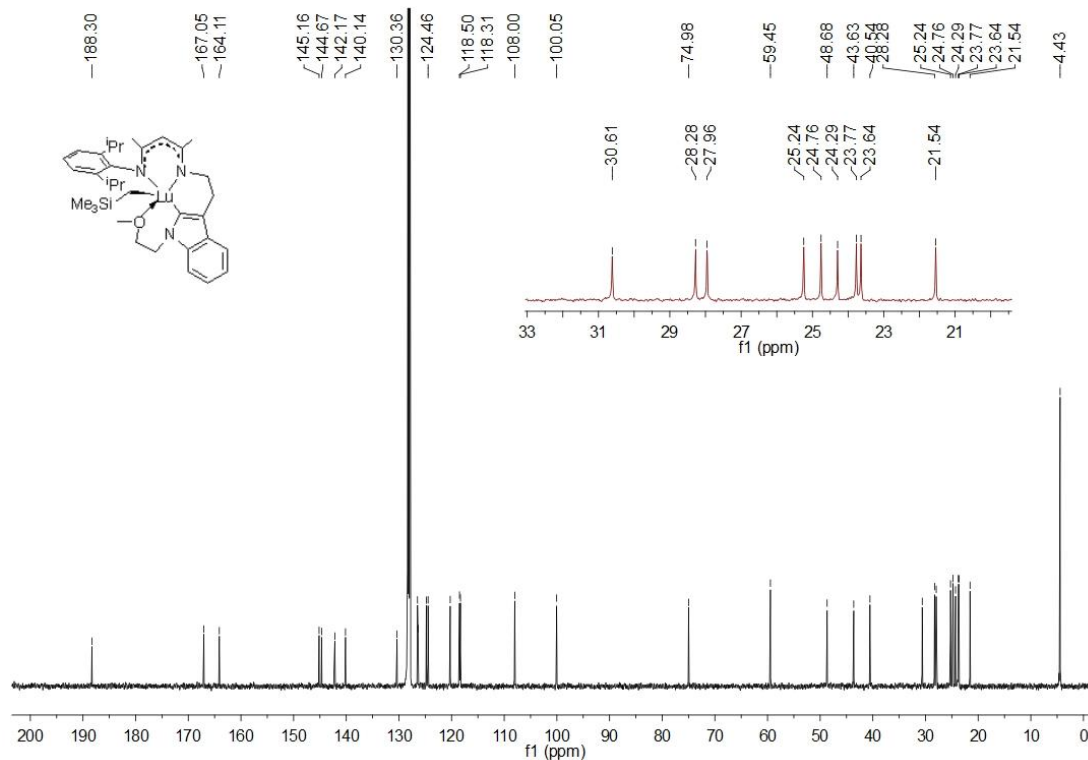

**Fig. S22**  $^{13}\text{C}\{^1\text{H}\}$  NMR spectrum of the complex **2d** (125 MHz,  $\text{C}_6\text{D}_6$ )

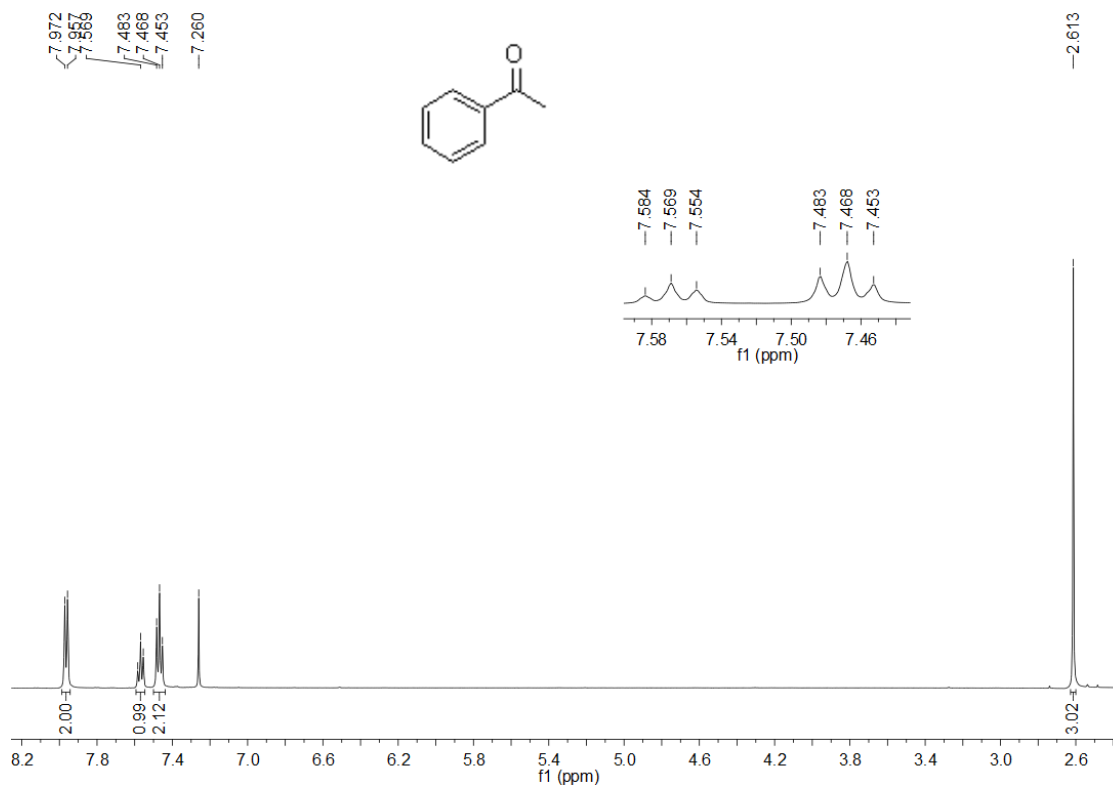

**Fig. S23**  $^1\text{H}$  NMR spectrum of **4a** (500 MHz,  $\text{CDCl}_3$ )

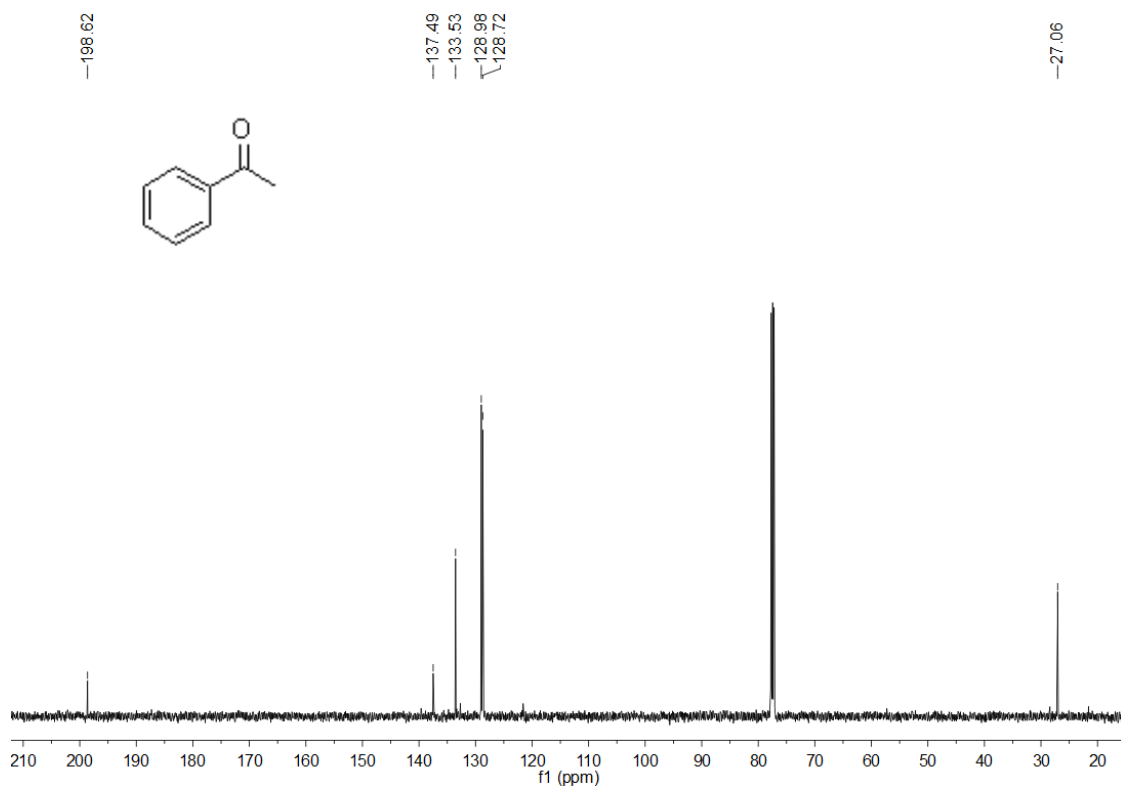

**Fig. S24**  $^{13}\text{C}\{^1\text{H}\}$  NMR spectrum of **4a** (125 MHz,  $\text{CDCl}_3$ )

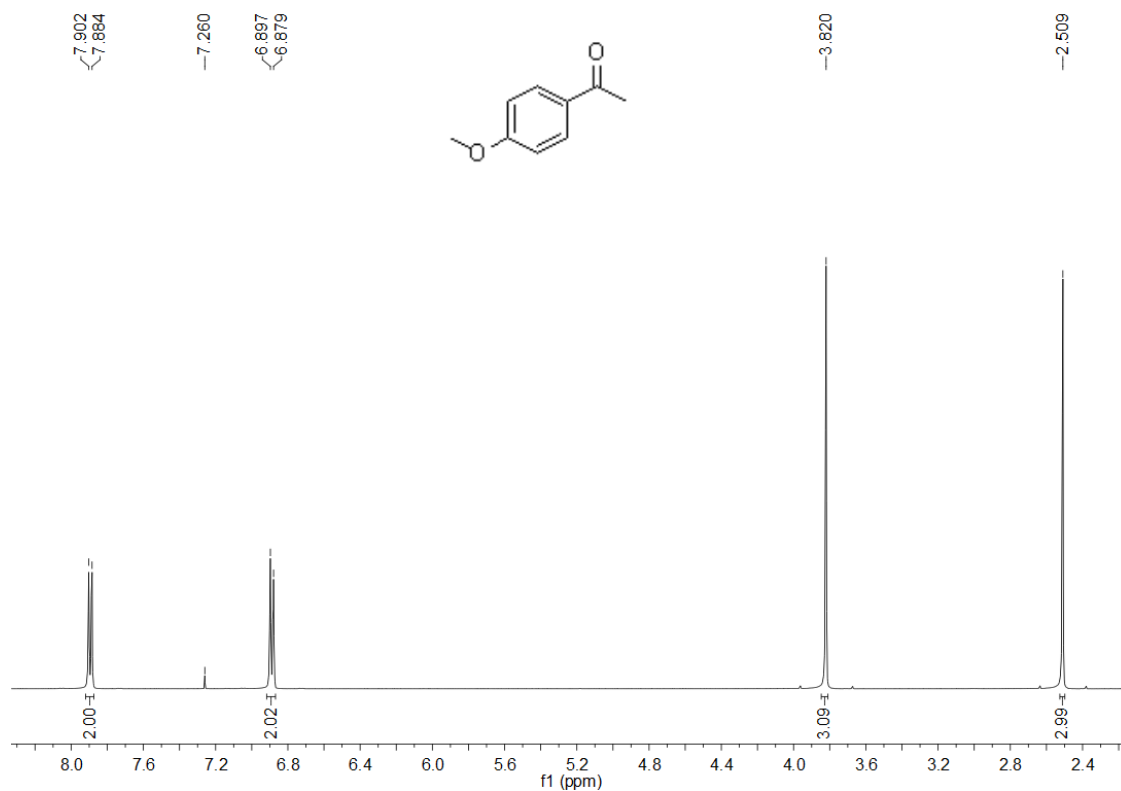

**Fig. S25**  $^1\text{H}$  NMR spectrum of **4b** (500 MHz,  $\text{CDCl}_3$ )



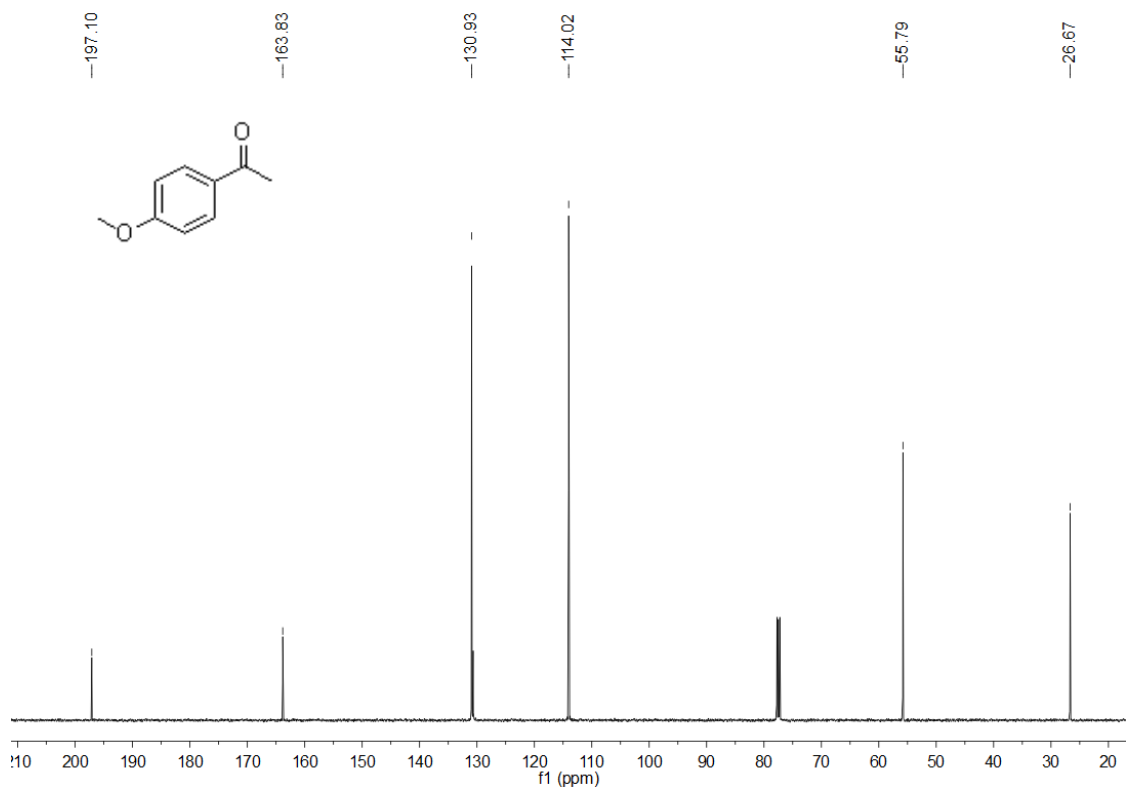

**Fig. S26**  $^{13}\text{C}\{^1\text{H}\}$  NMR spectrum of **4b** (125 MHz,  $\text{CDCl}_3$ )

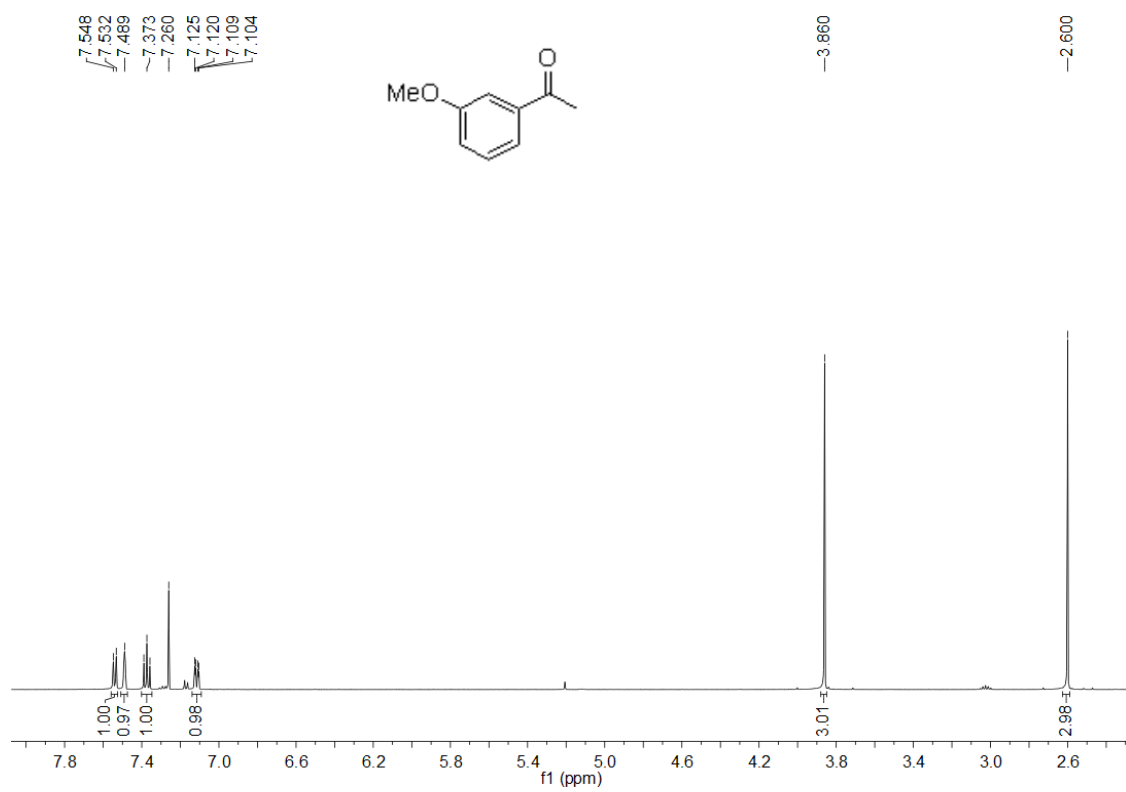

**Fig. S27**  $^1\text{H}$  NMR spectrum of **4c** (500 MHz,  $\text{CDCl}_3$ )

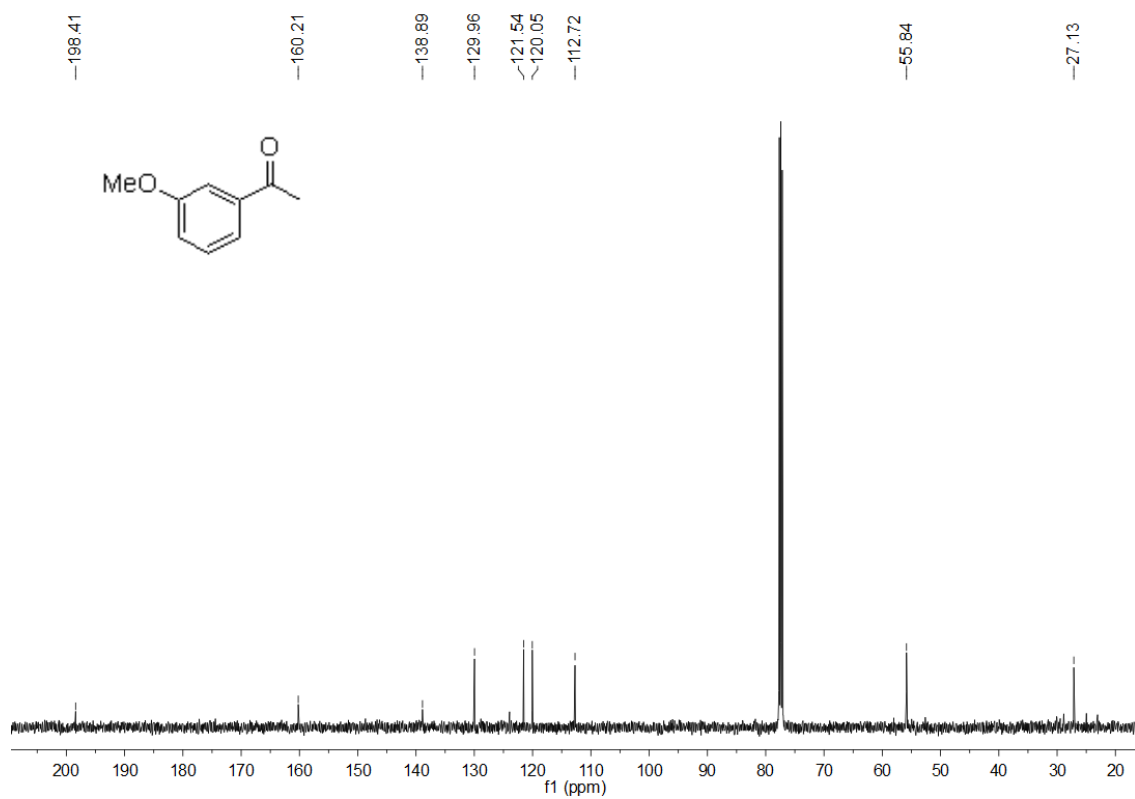

**Fig. S28**  $^{13}\text{C}\{^1\text{H}\}$  NMR spectrum of **4c** (125 MHz,  $\text{CDCl}_3$ )

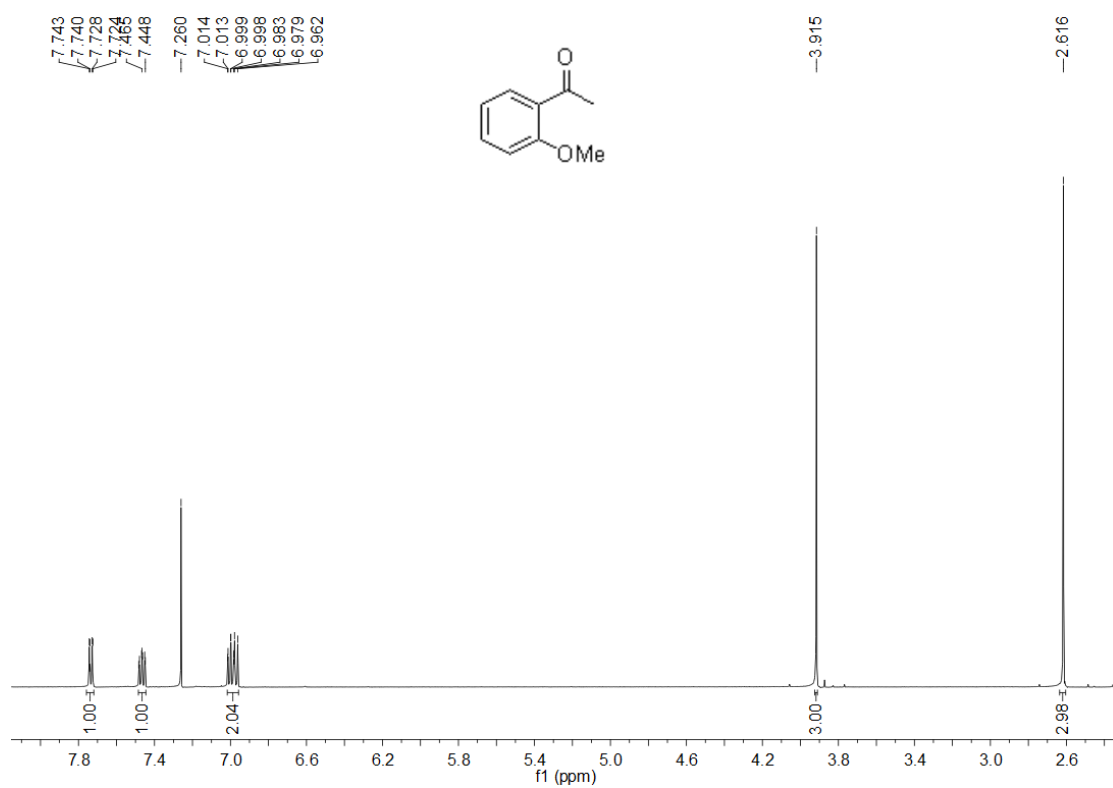

**Fig. S29**  $^1\text{H}$  NMR spectrum of **4d** (500 MHz,  $\text{CDCl}_3$ )

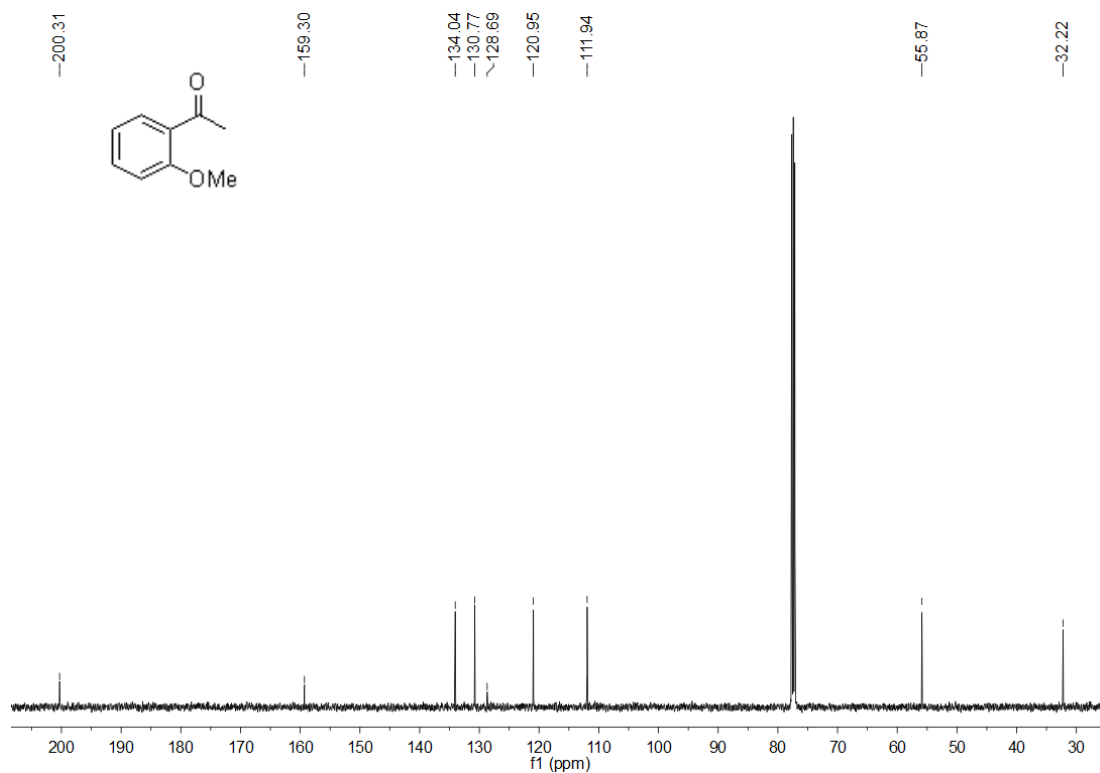

Fig. S30  $^{13}\text{C}\{^1\text{H}\}$  NMR spectrum of **4d** (125 MHz,  $\text{CDCl}_3$ )

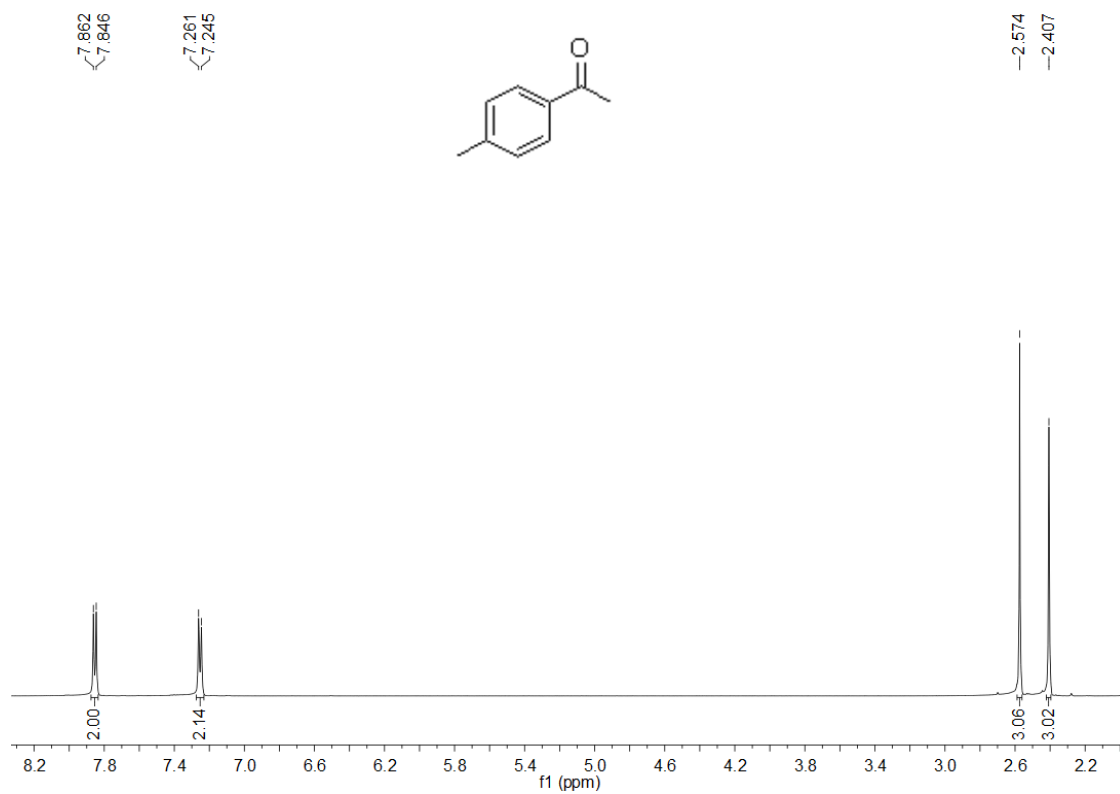

Fig. S31  $^1\text{H}$  NMR spectrum of **4e** (500 MHz,  $\text{CDCl}_3$ )

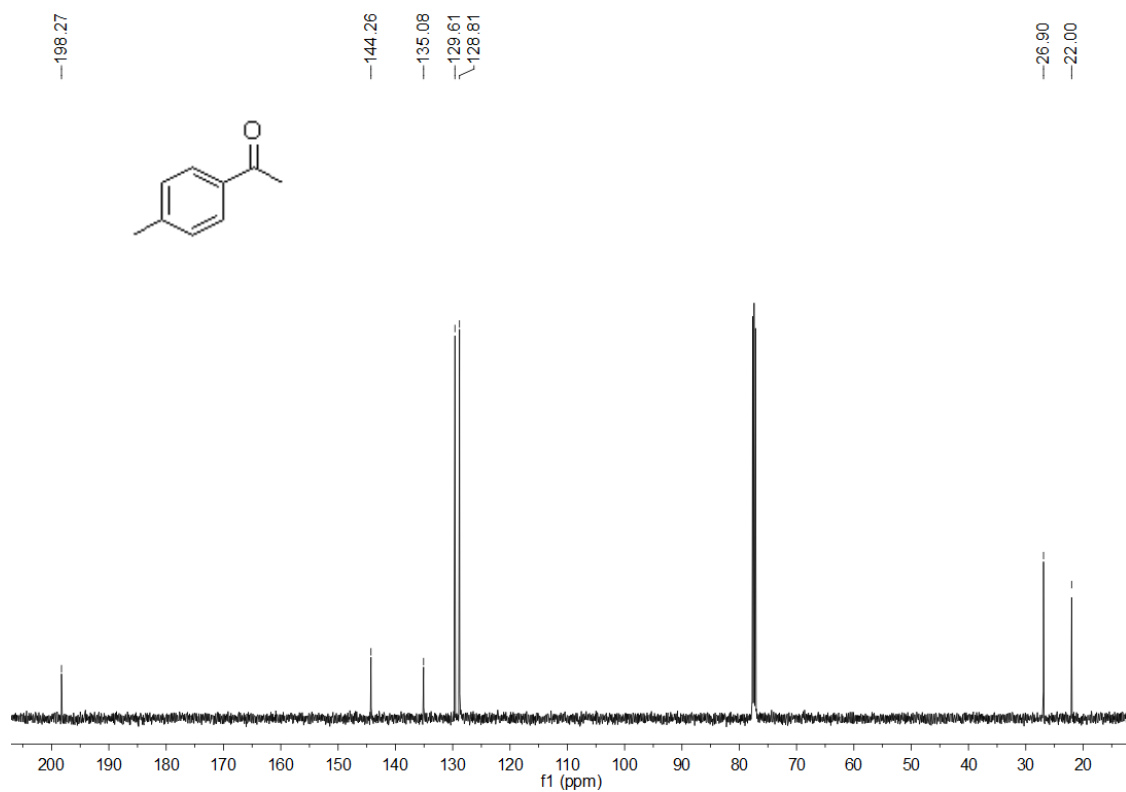

Fig. S32  $^{13}\text{C}\{^1\text{H}\}$  NMR spectrum of **4e** (125 MHz,  $\text{CDCl}_3$ )

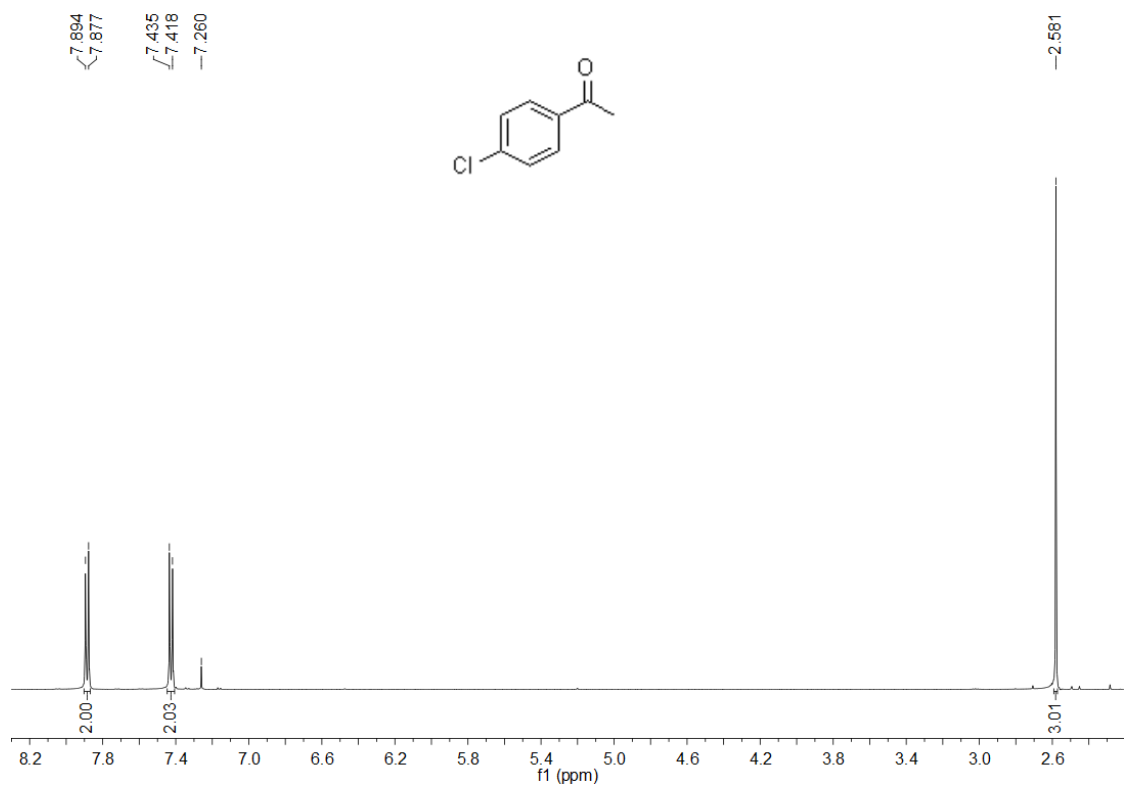

Fig. S33  $^1\text{H}$  NMR spectrum of **4f** (500 MHz,  $\text{CDCl}_3$ )

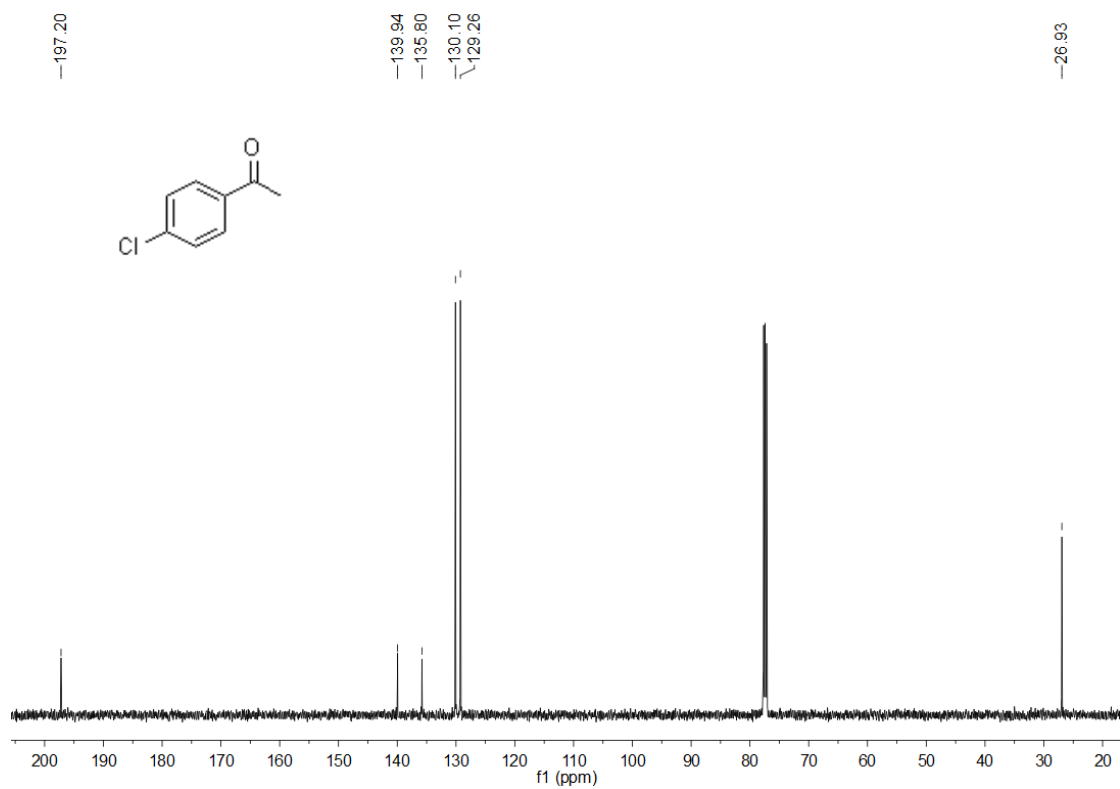

**Fig. S34**  $^{13}\text{C}\{^1\text{H}\}$  NMR spectrum of **4f** (125 MHz,  $\text{CDCl}_3$ )

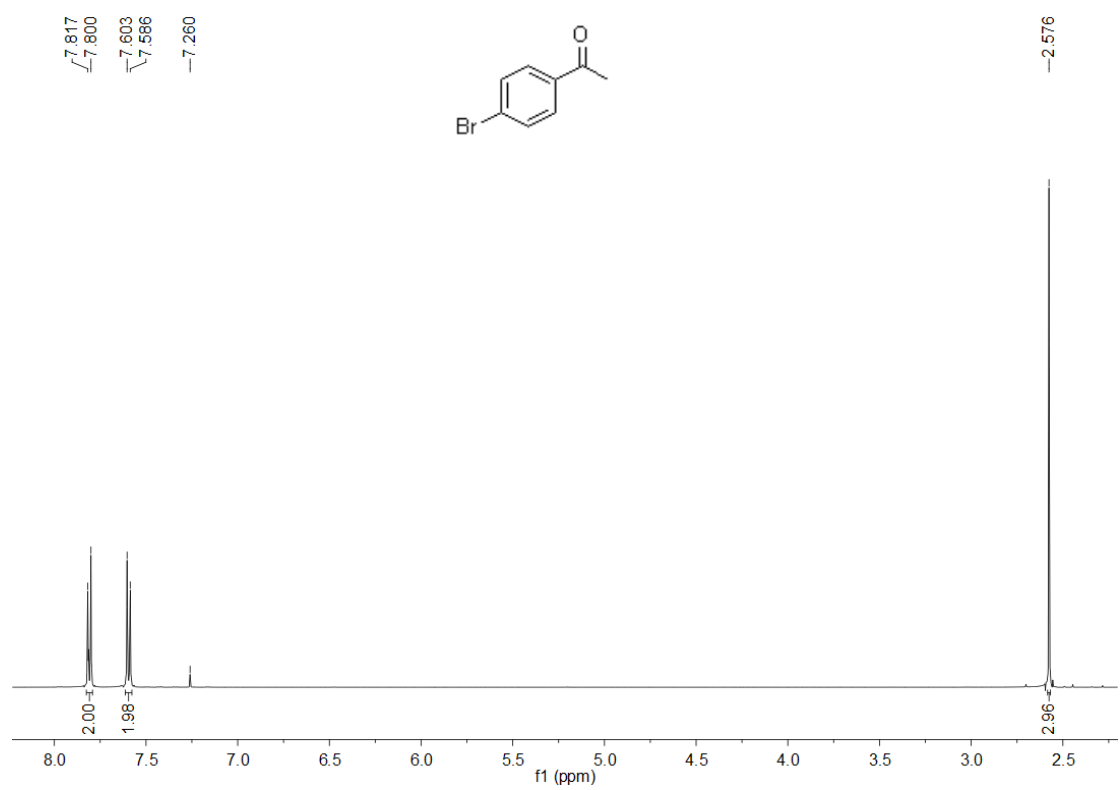

**Fig. S35**  $^1\text{H}$  NMR spectrum of **4g** (500 MHz,  $\text{CDCl}_3$ )

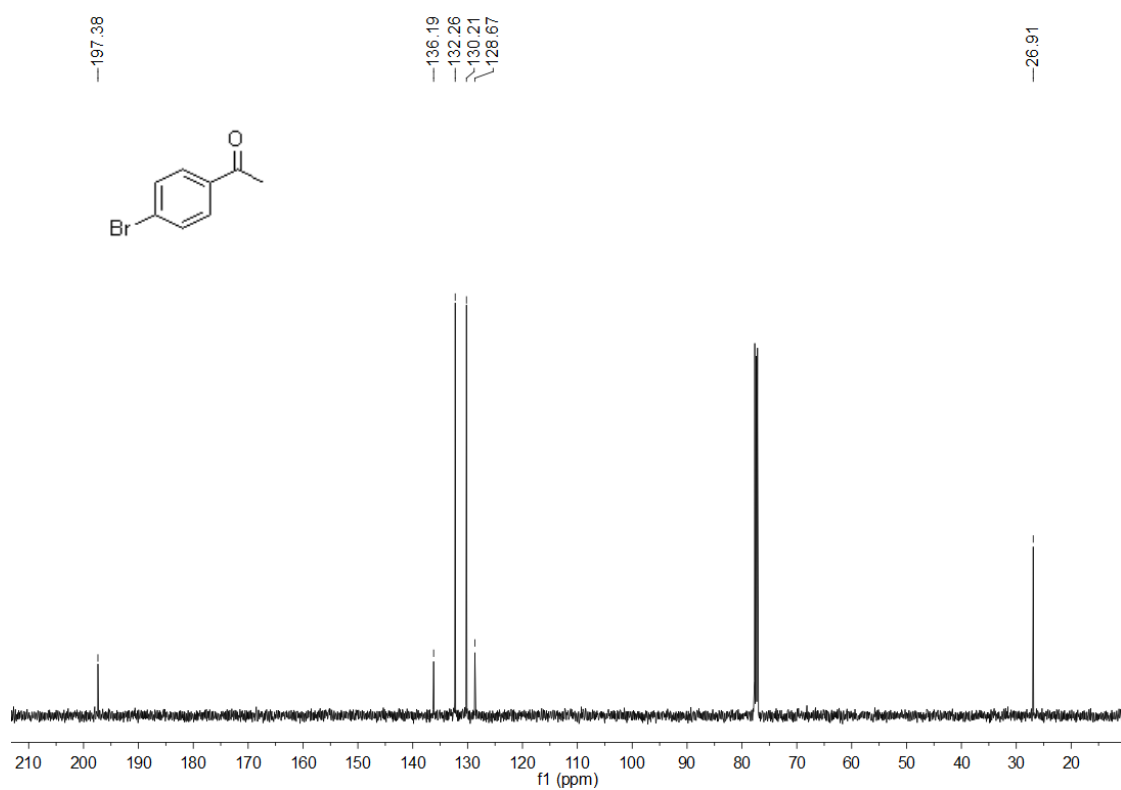

**Fig. S36**  $^{13}\text{C}\{^1\text{H}\}$  NMR spectrum of **4g** (125 MHz,  $\text{CDCl}_3$ )

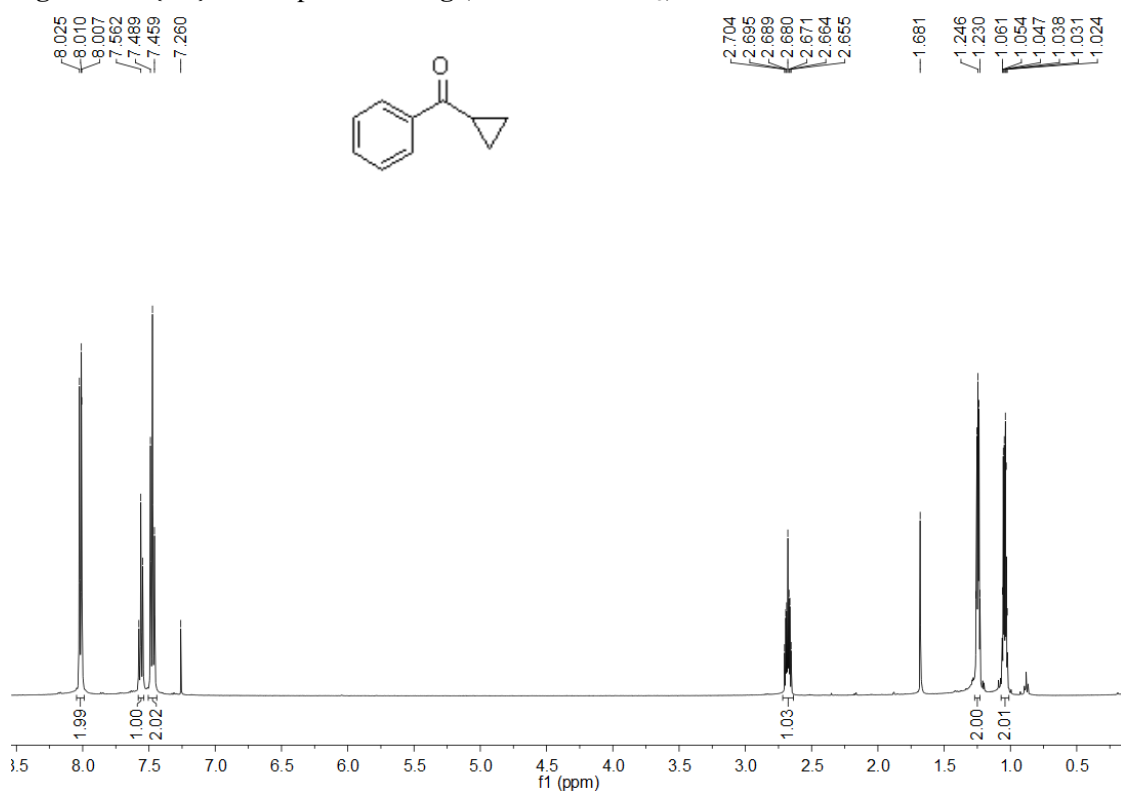

**Fig. S37**  $^1\text{H}$  NMR spectrum of **4h** (500 MHz,  $\text{CDCl}_3$ )

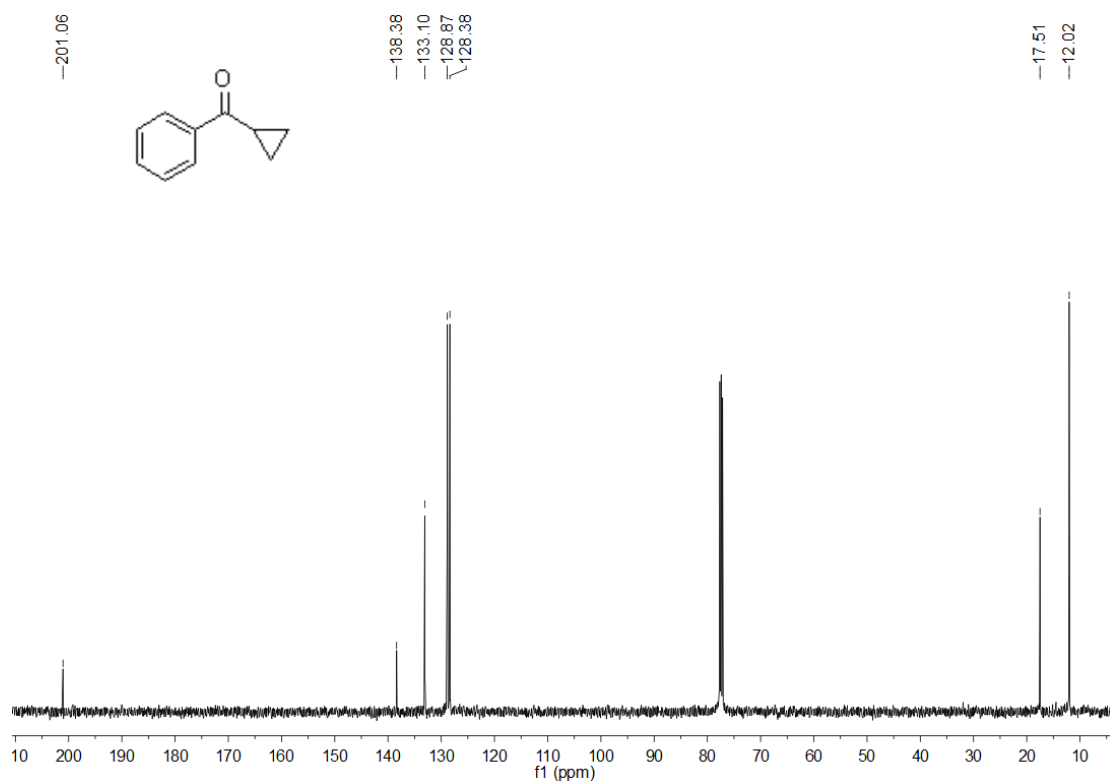

**Fig. S38**  $^{13}\text{C}\{^1\text{H}\}$  NMR spectrum of **4h** (125 MHz,  $\text{CDCl}_3$ )

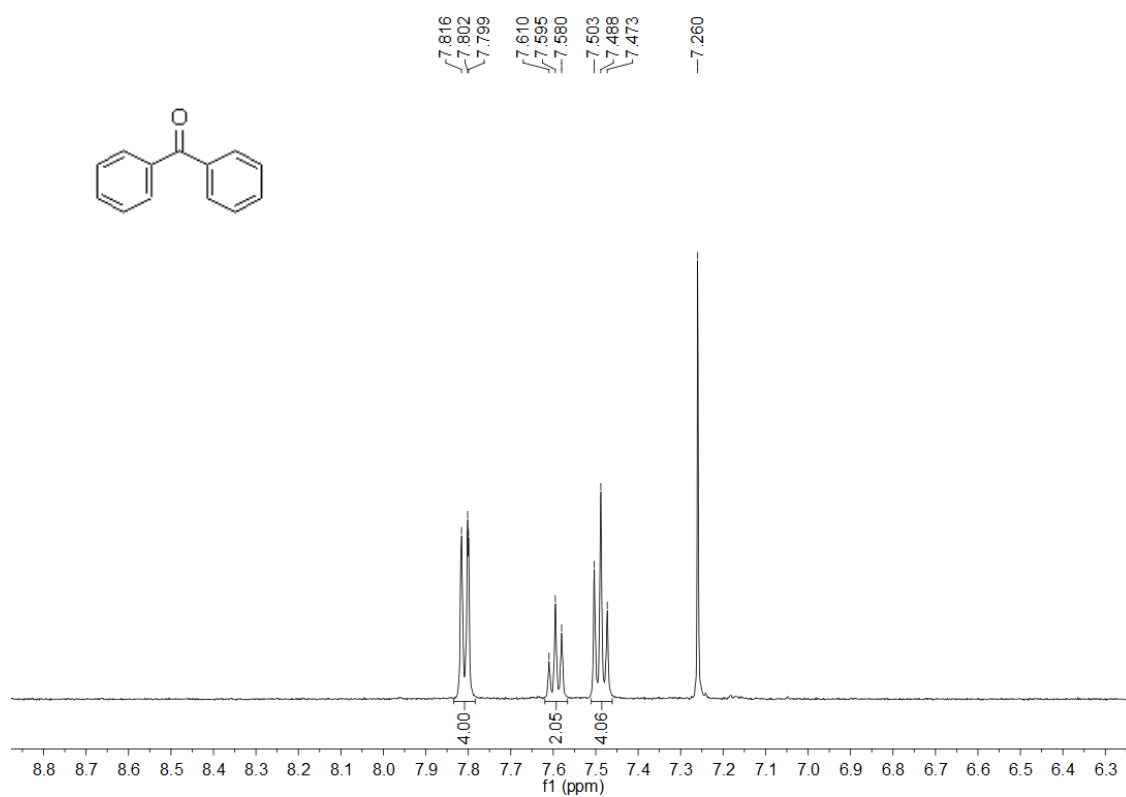

**Fig. S39**  $^1\text{H}$  NMR spectrum of **4i** (500 MHz,  $\text{CDCl}_3$ )

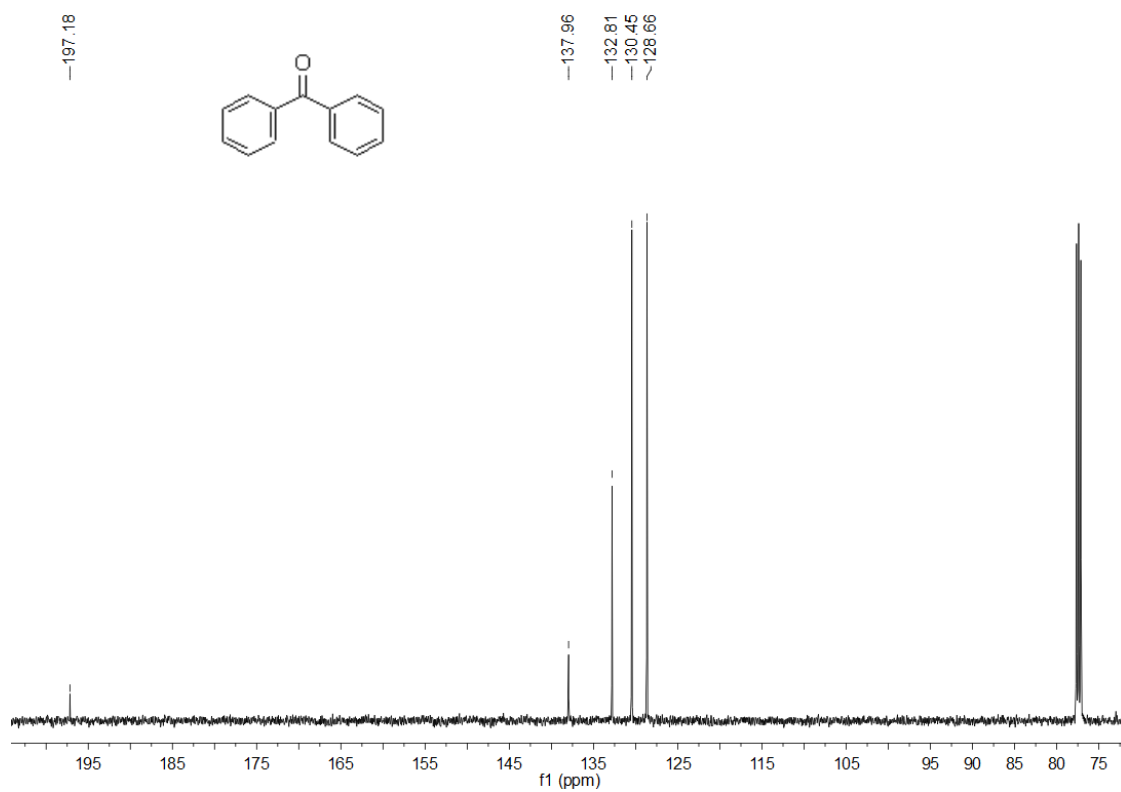

Fig. S40  $^{13}\text{C}\{^1\text{H}\}$  NMR spectrum of **4i** (125 MHz,  $\text{CDCl}_3$ )

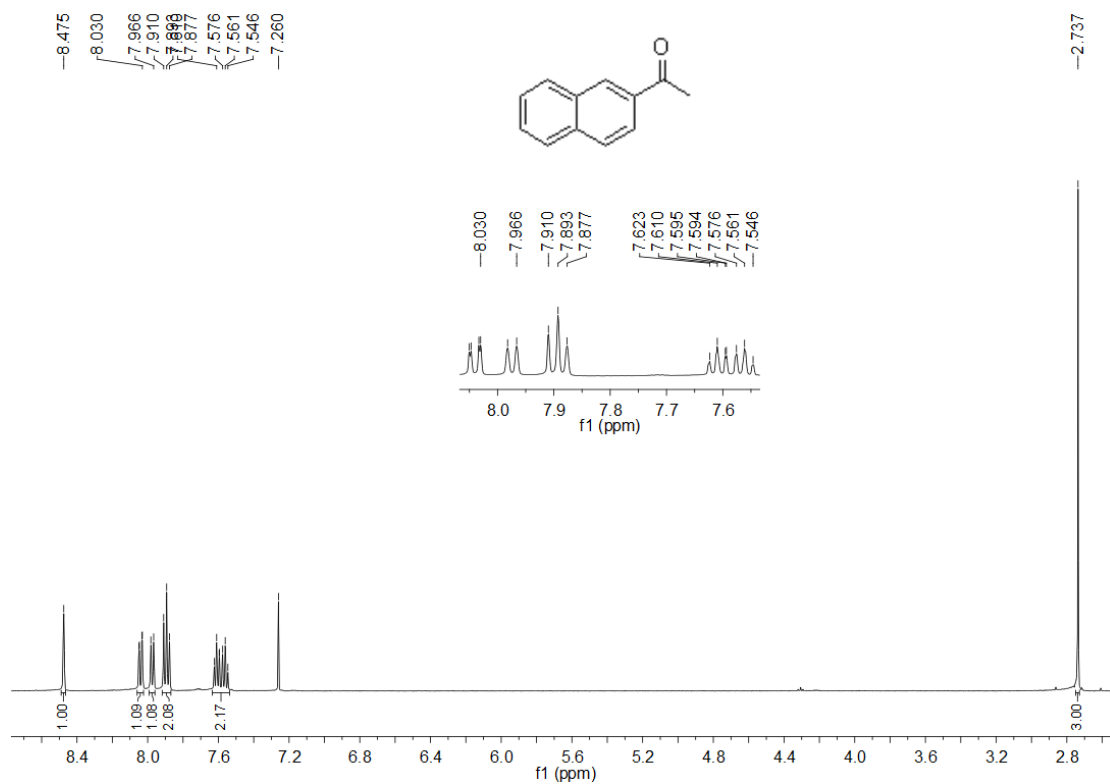

Fig. S41  $^1\text{H}$  NMR spectrum of **4j** (500 MHz,  $\text{CDCl}_3$ )



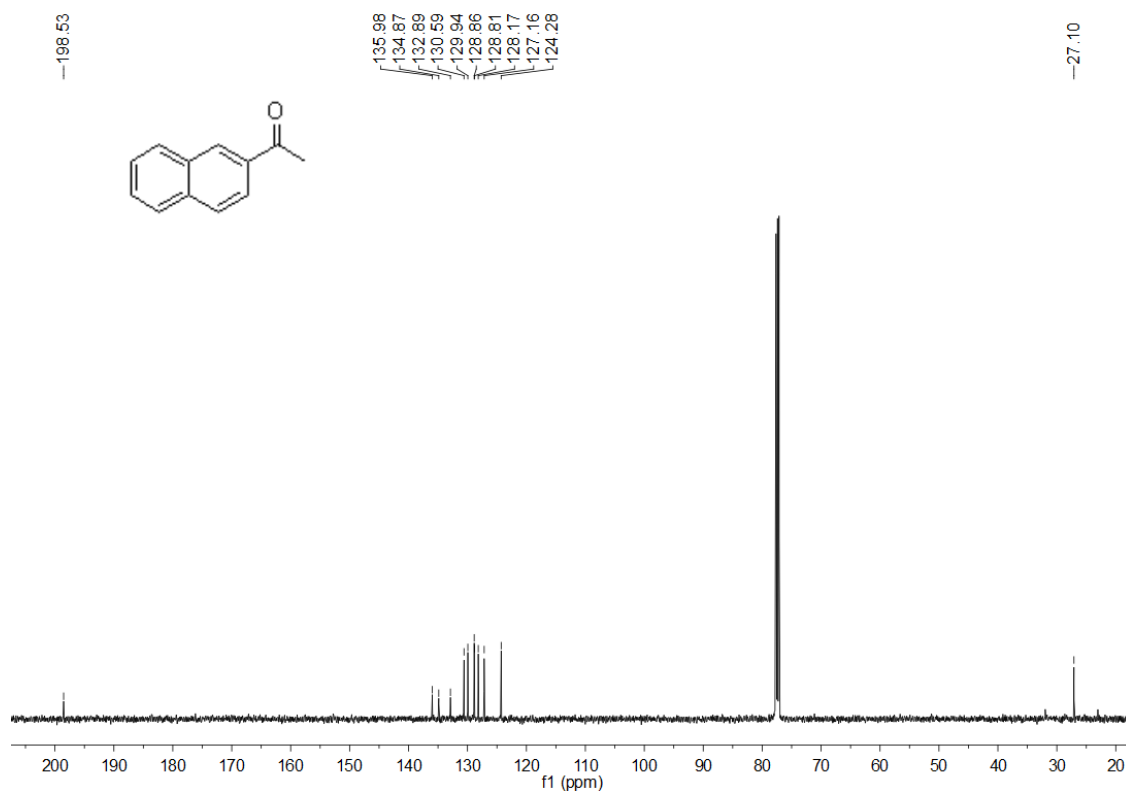

**Fig. S42**  $^{13}\text{C}\{^1\text{H}\}$  NMR spectrum of **4j** (125 MHz,  $\text{CDCl}_3$ )

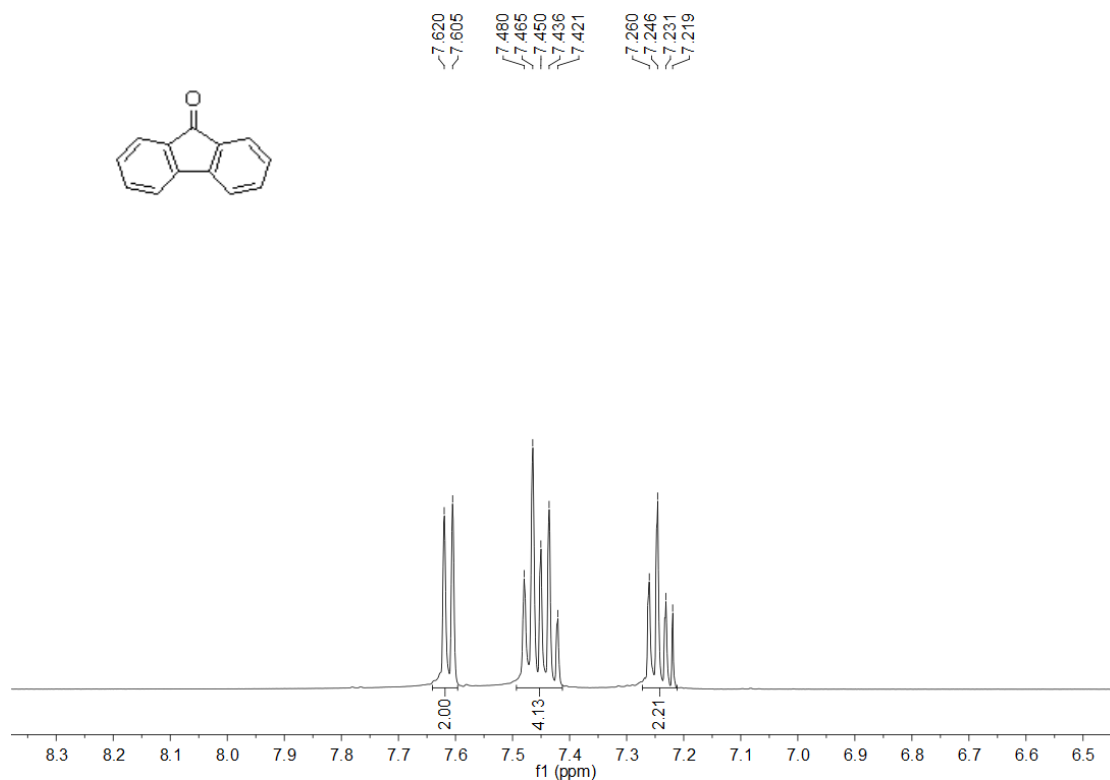

**Fig. S43**  $^1\text{H}$  NMR spectrum of **4k** (500 MHz,  $\text{CDCl}_3$ )

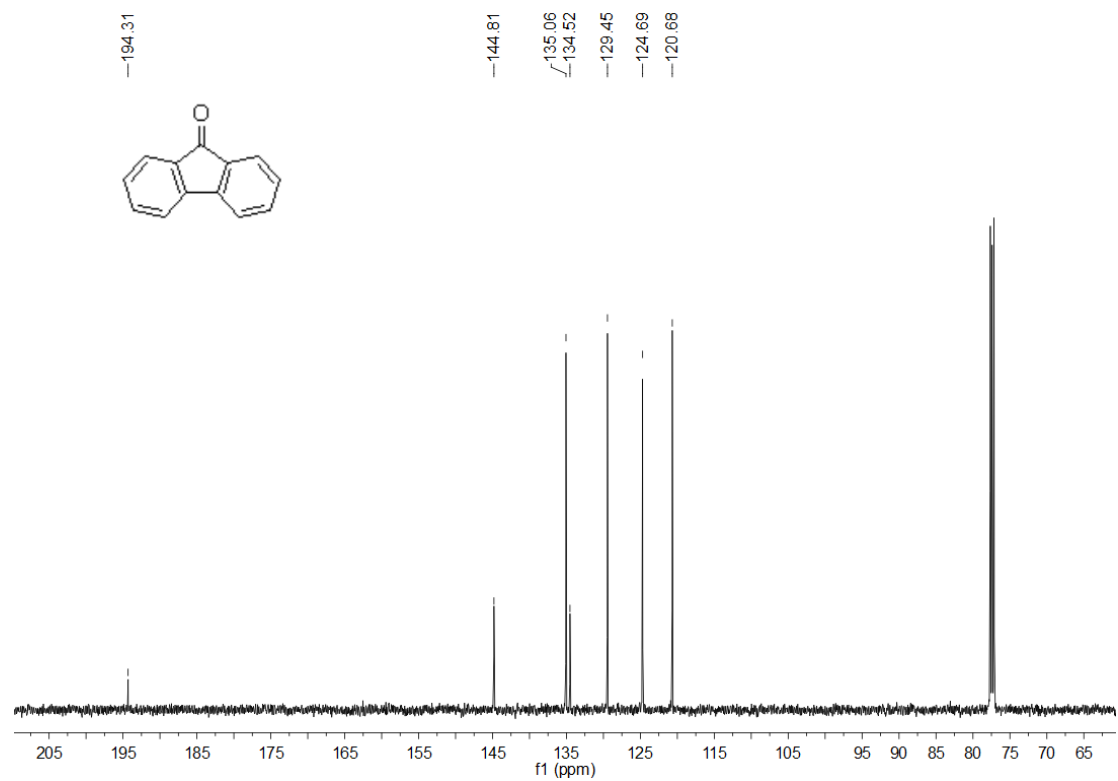

**Fig. S44**  $^{13}\text{C}\{^1\text{H}\}$  NMR spectrum of **4k** (125 MHz,  $\text{CDCl}_3$ )

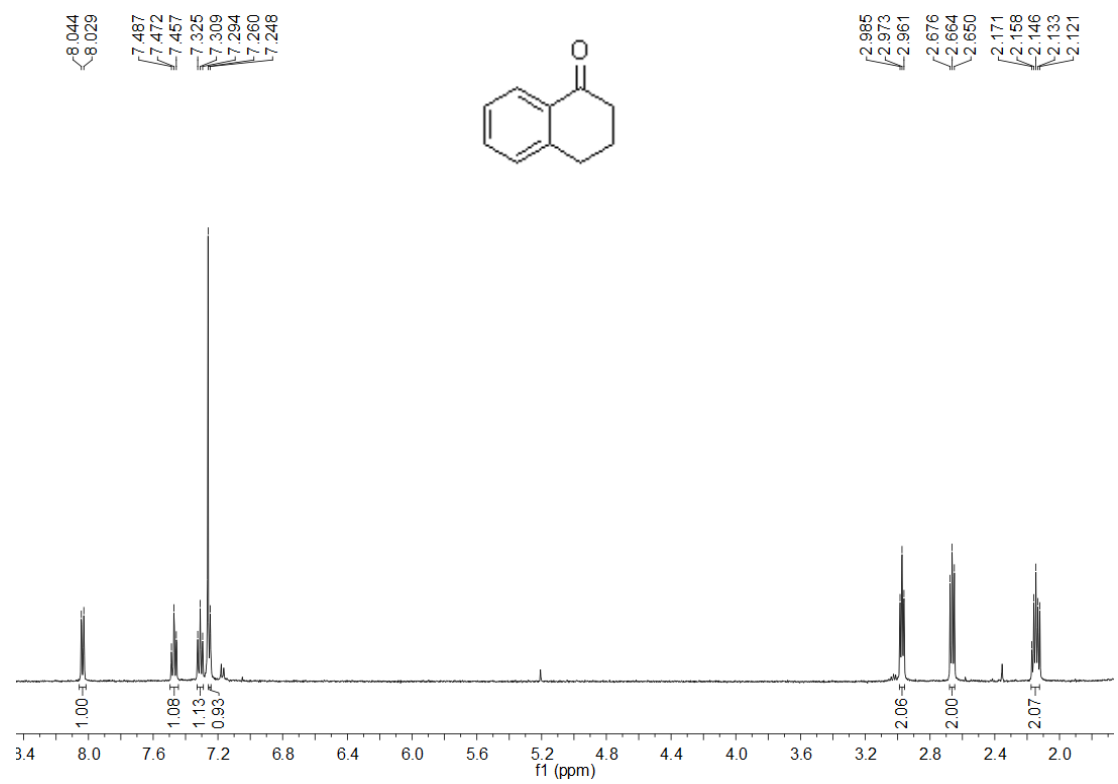

**Fig. S45**  $^1\text{H}$  NMR spectrum of **4l** (500 MHz,  $\text{CDCl}_3$ )

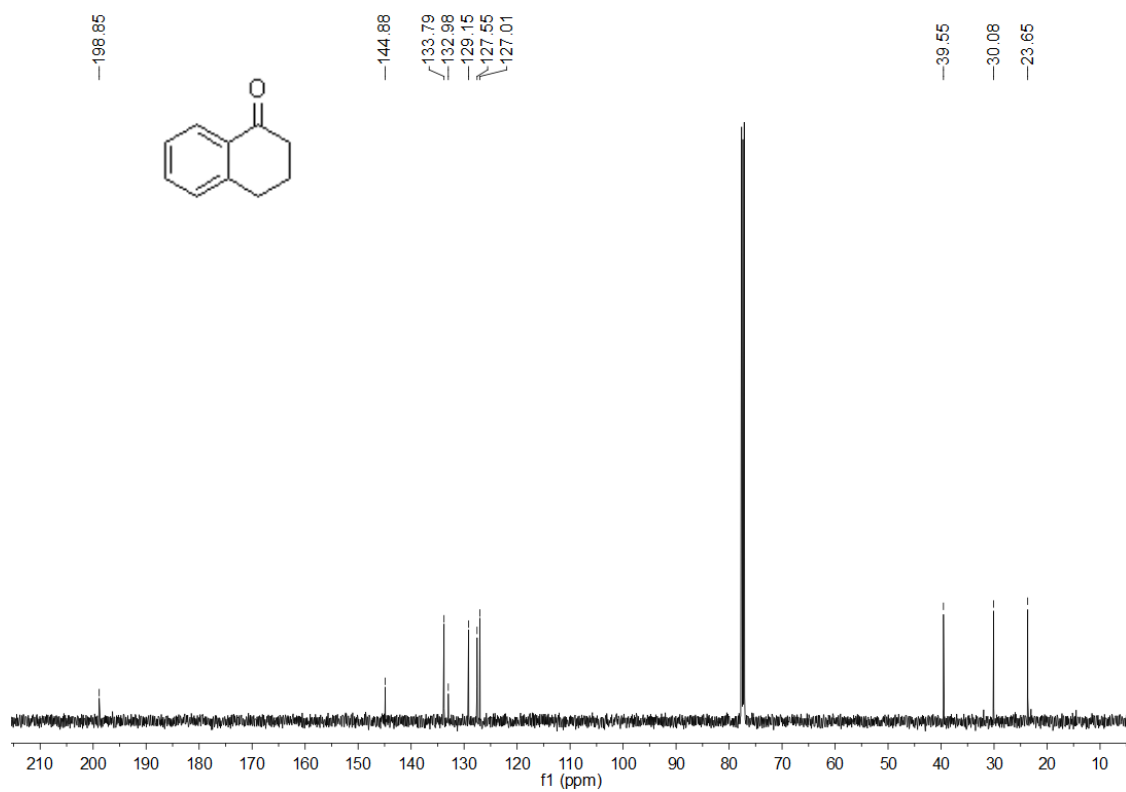

**Fig. S46**  $^{13}\text{C}\{^1\text{H}\}$  NMR spectrum of **4l** (125 MHz,  $\text{CDCl}_3$ )

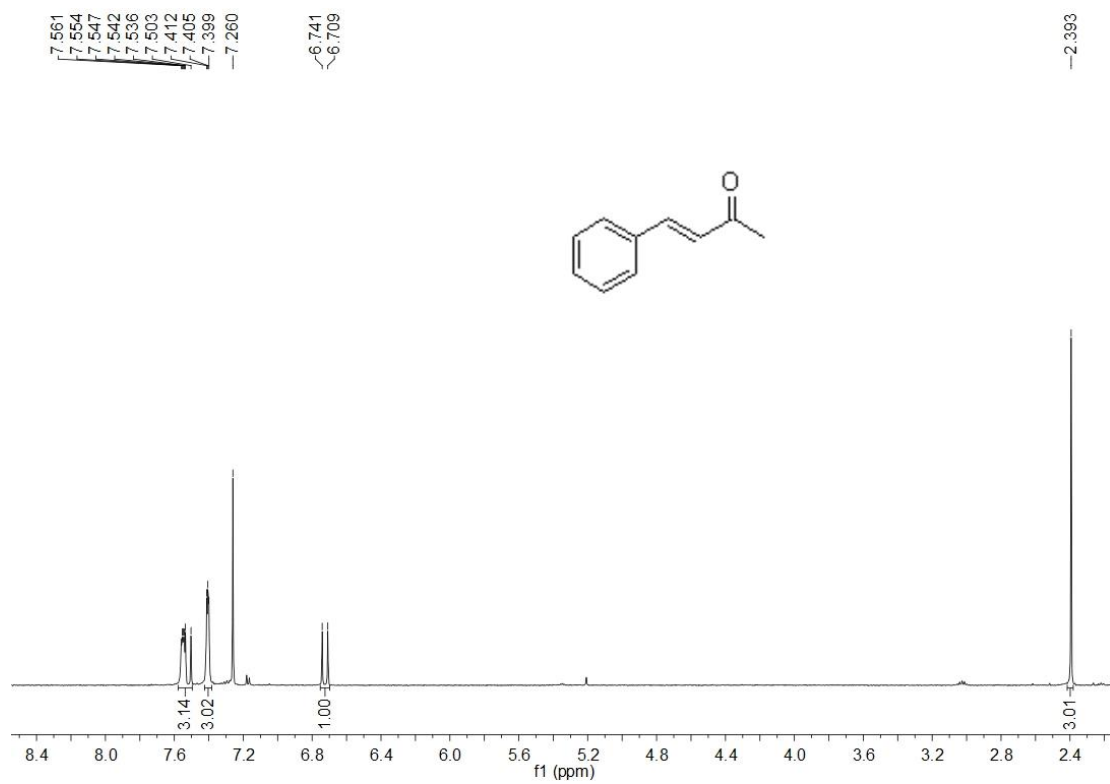

**Fig. S47**  $^1\text{H}$  NMR spectrum of **6a** (500 MHz,  $\text{CDCl}_3$ )

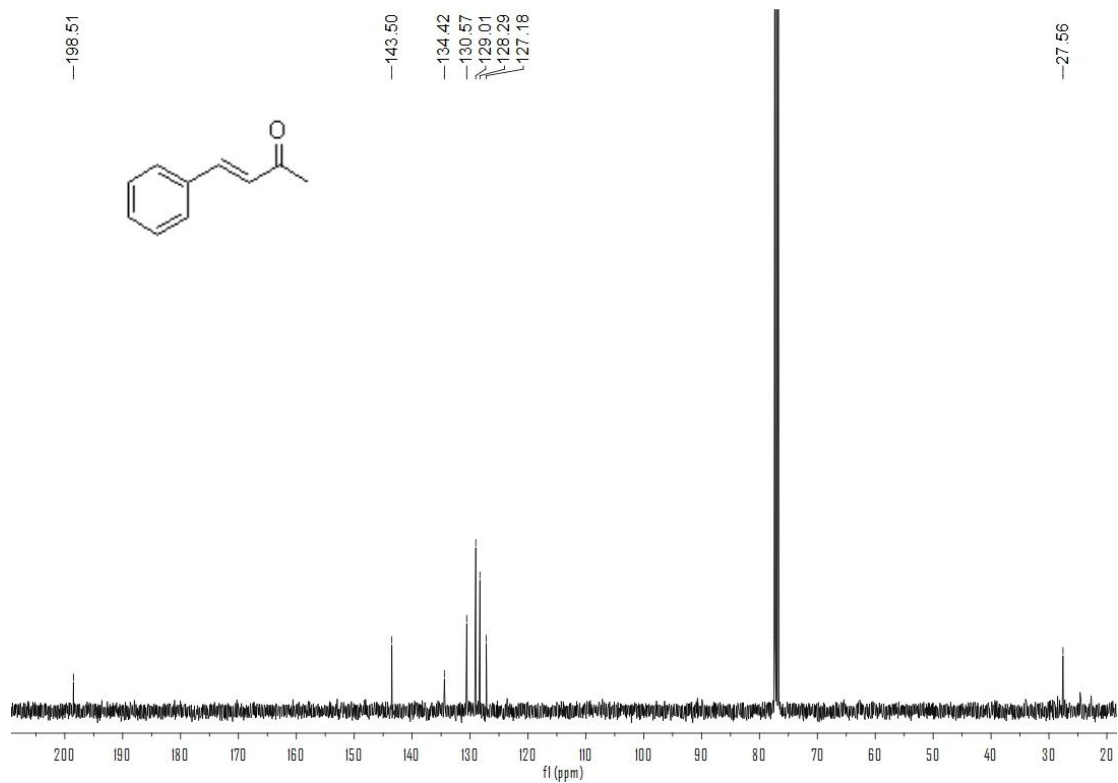

**Fig. S48**  $^{13}\text{C}\{^1\text{H}\}$  NMR spectrum of **6a** (125 MHz,  $\text{CDCl}_3$ )

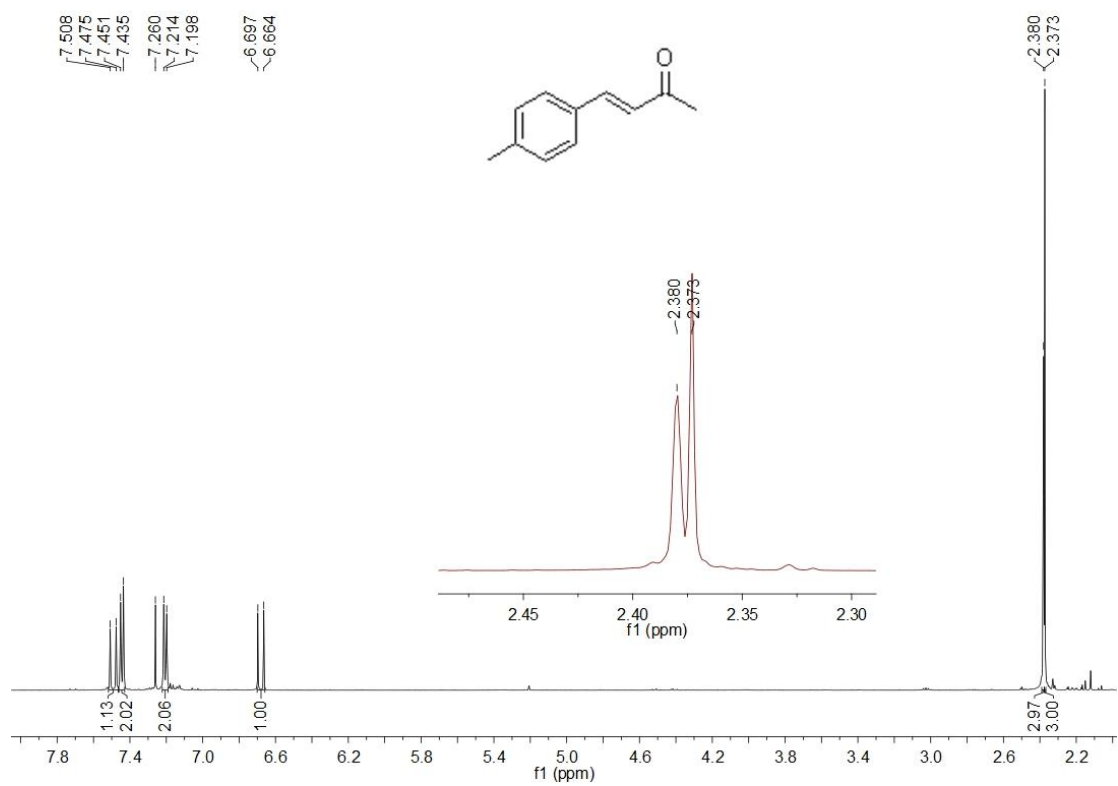

**Fig. S49**  $^1\text{H}$  NMR spectrum of **6b** (500 MHz,  $\text{CDCl}_3$ )

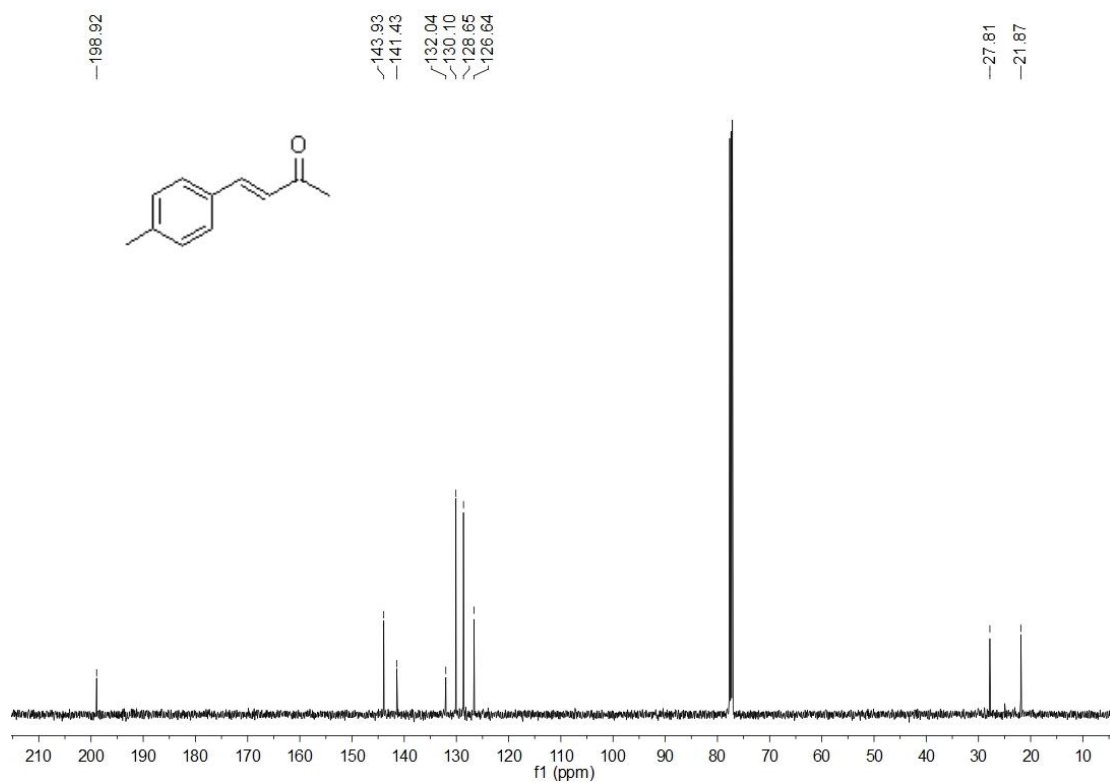

**Fig. S50**  $^{13}\text{C}\{^1\text{H}\}$  NMR spectrum of **6b** (125 MHz,  $\text{CDCl}_3$ )

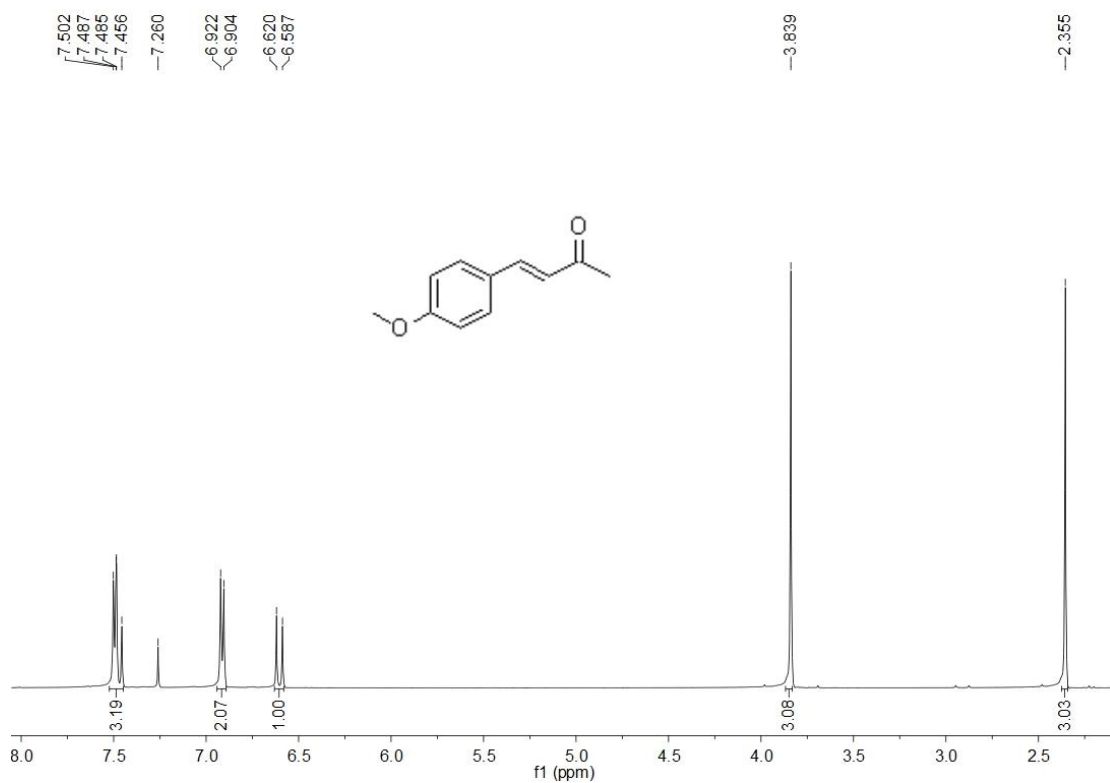

**Fig. S51**  $^1\text{H}$  NMR spectrum of **6c** (500 MHz,  $\text{CDCl}_3$ )

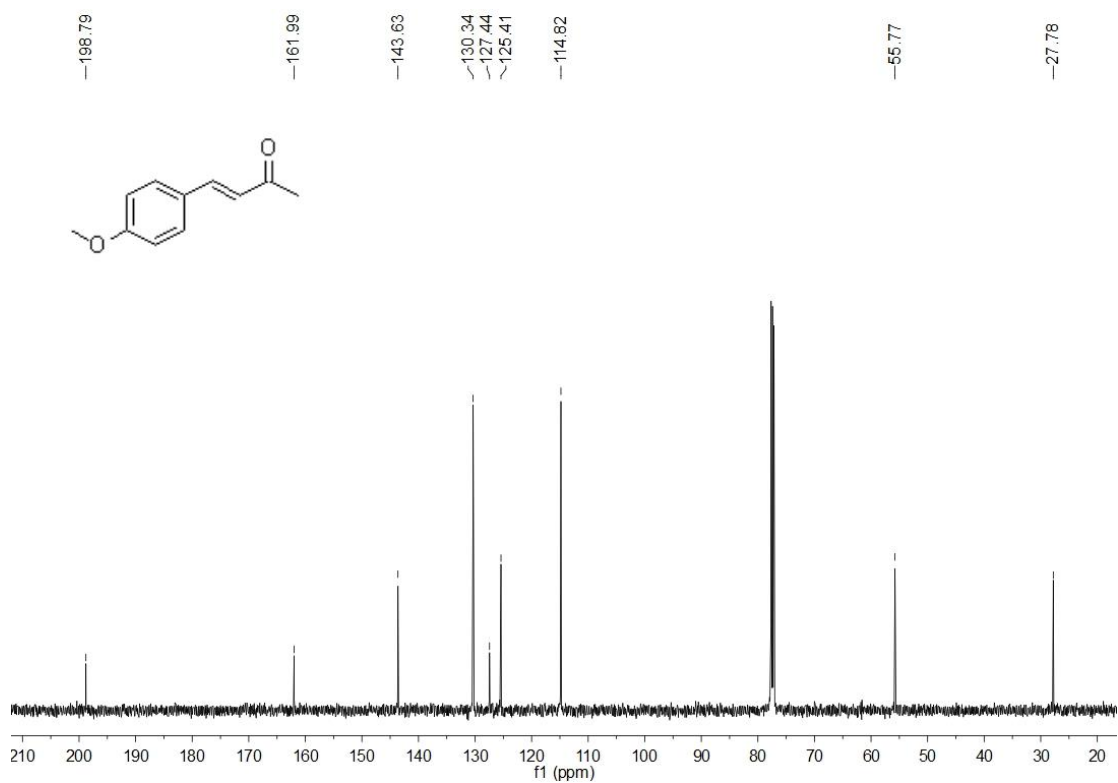

**Fig. S52**  $^{13}\text{C}\{^1\text{H}\}$  NMR spectrum of **6c** (125 MHz,  $\text{CDCl}_3$ )

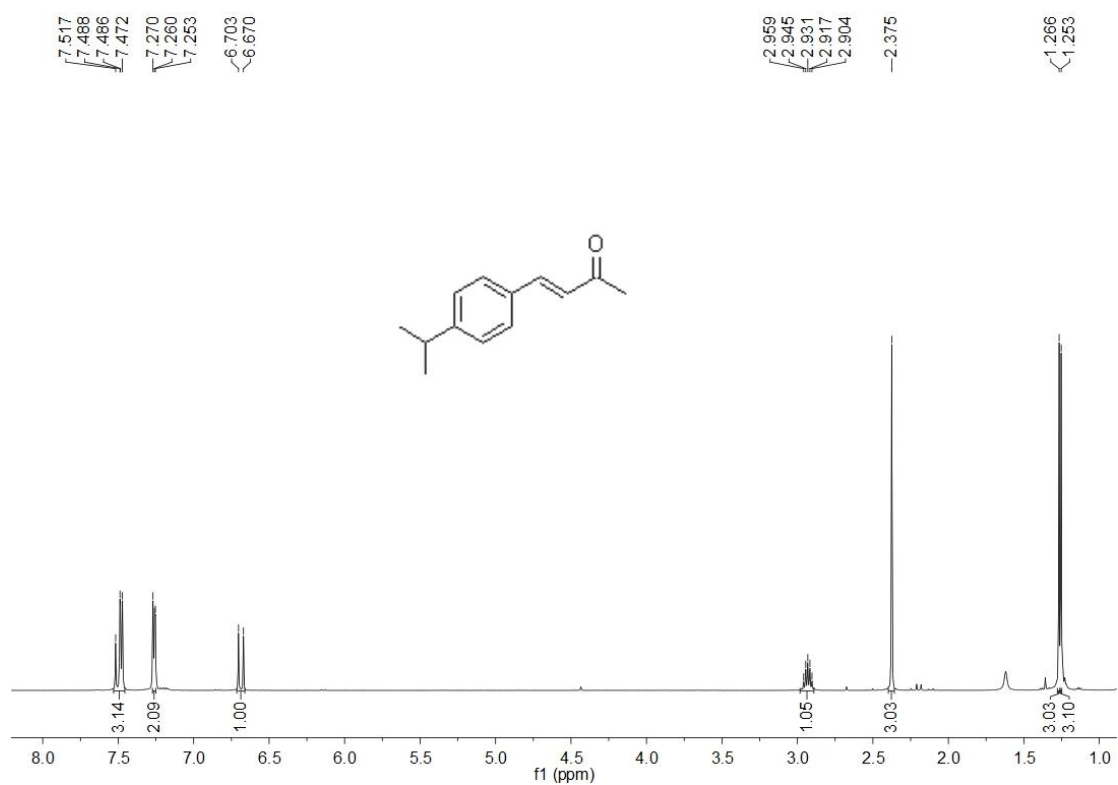

**Fig. S53**  $^1\text{H}$  NMR spectrum of **6d** (500 MHz,  $\text{CDCl}_3$ )

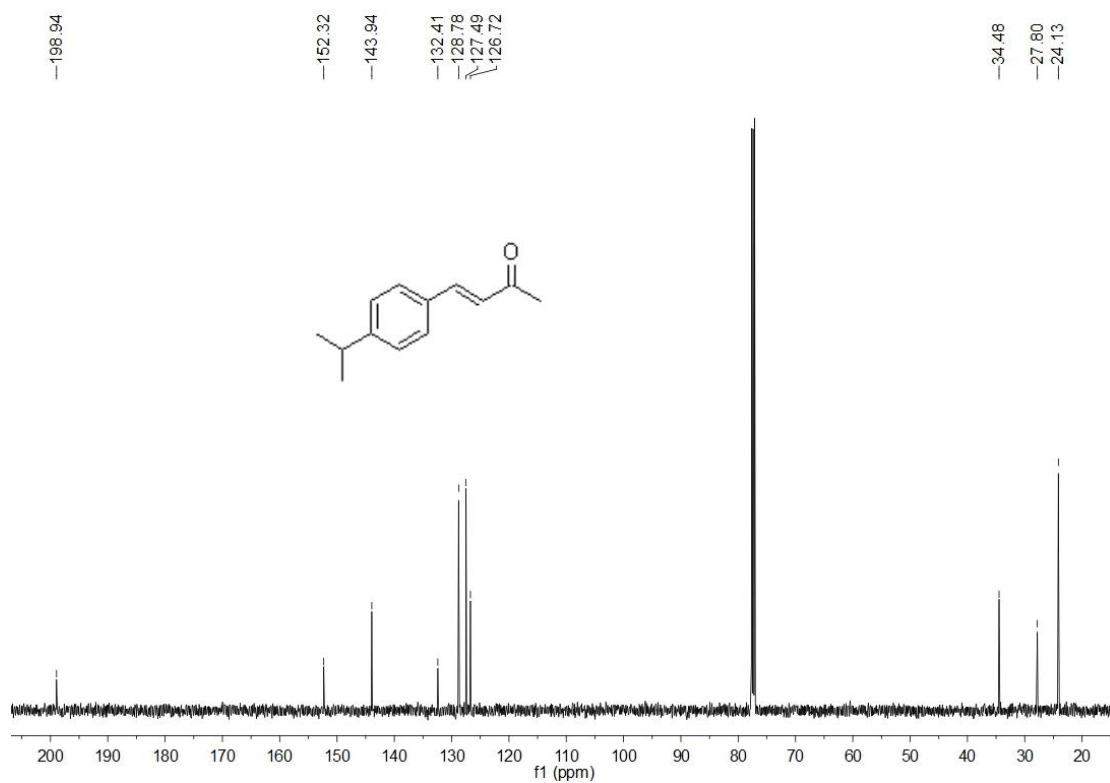

**Fig. S54**  $^{13}\text{C}\{^1\text{H}\}$  NMR spectrum of **6d** (125 MHz,  $\text{CDCl}_3$ )

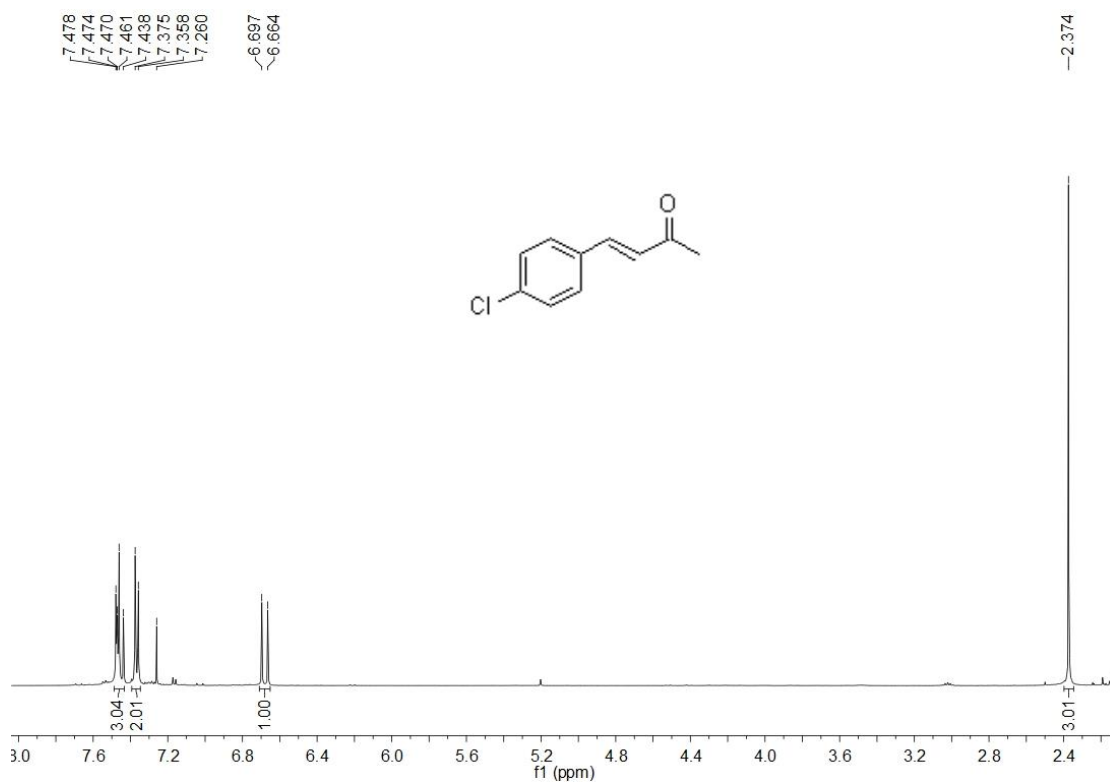

**Fig. S55**  $^1\text{H}$  NMR spectrum of **6e** (500 MHz,  $\text{CDCl}_3$ )

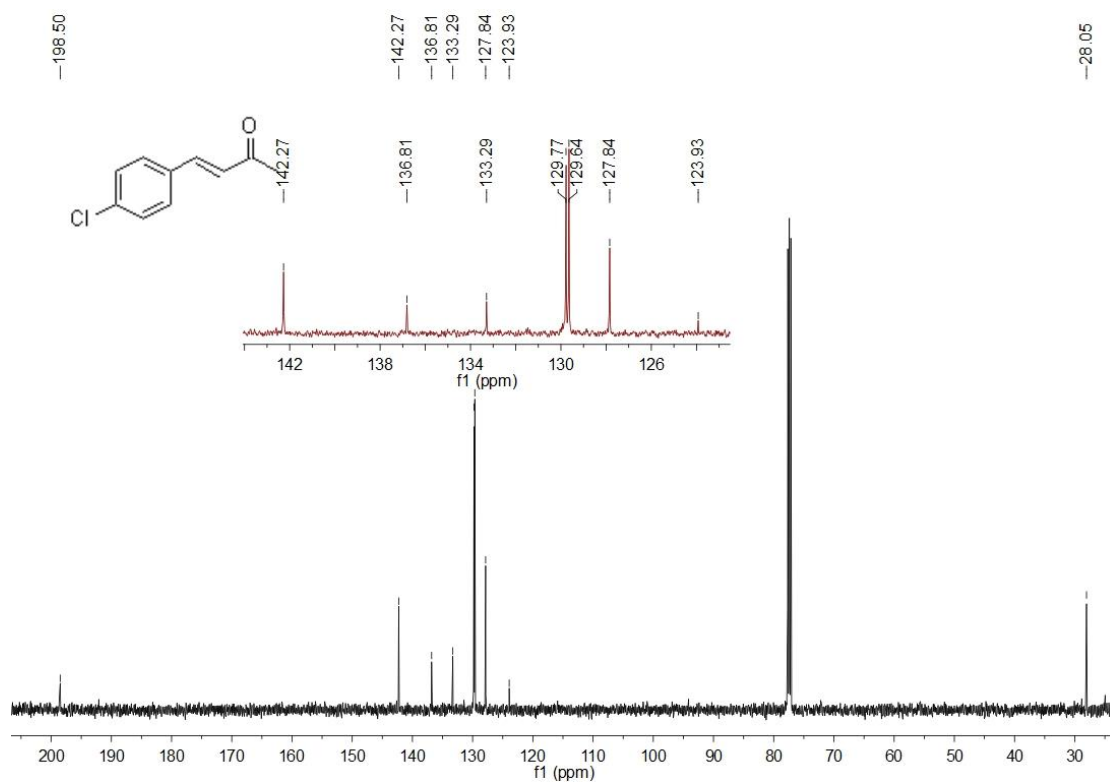

**Fig. S56**  $^{13}\text{C}\{^1\text{H}\}$  NMR spectrum of **6e** (125 MHz,  $\text{CDCl}_3$ )

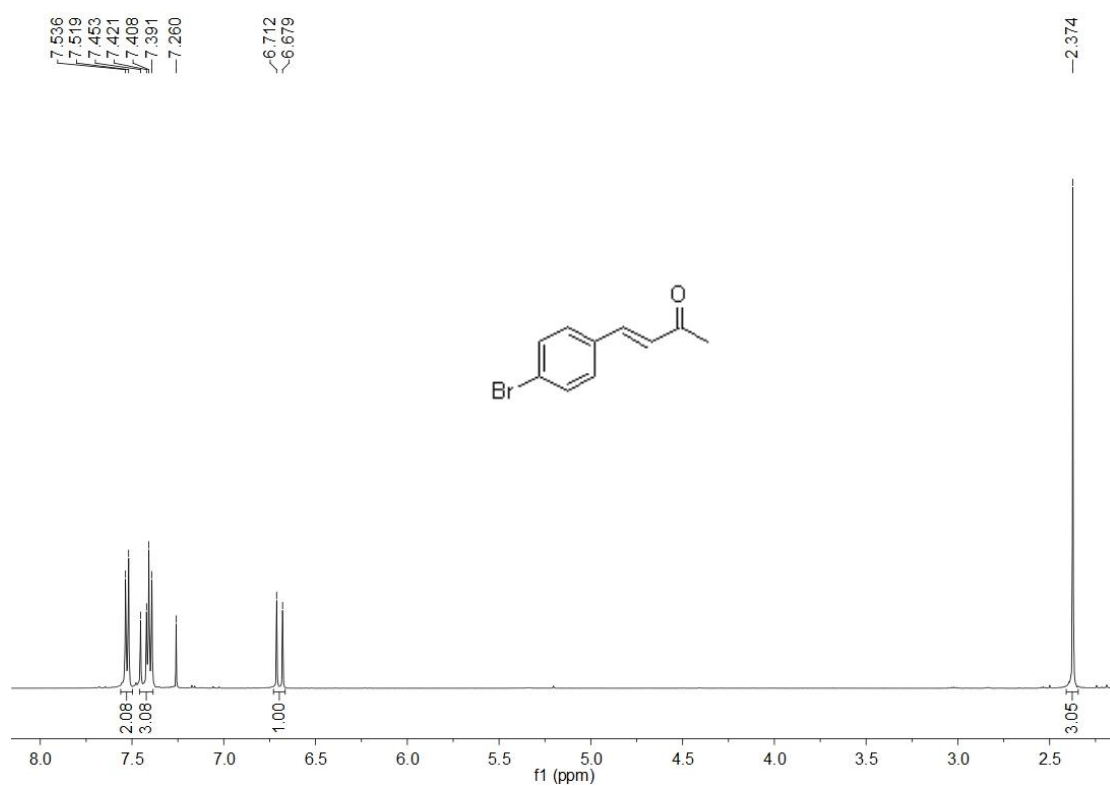

**Fig. S57**  $^1\text{H}$  NMR spectrum of **6f** (500 MHz,  $\text{CDCl}_3$ )



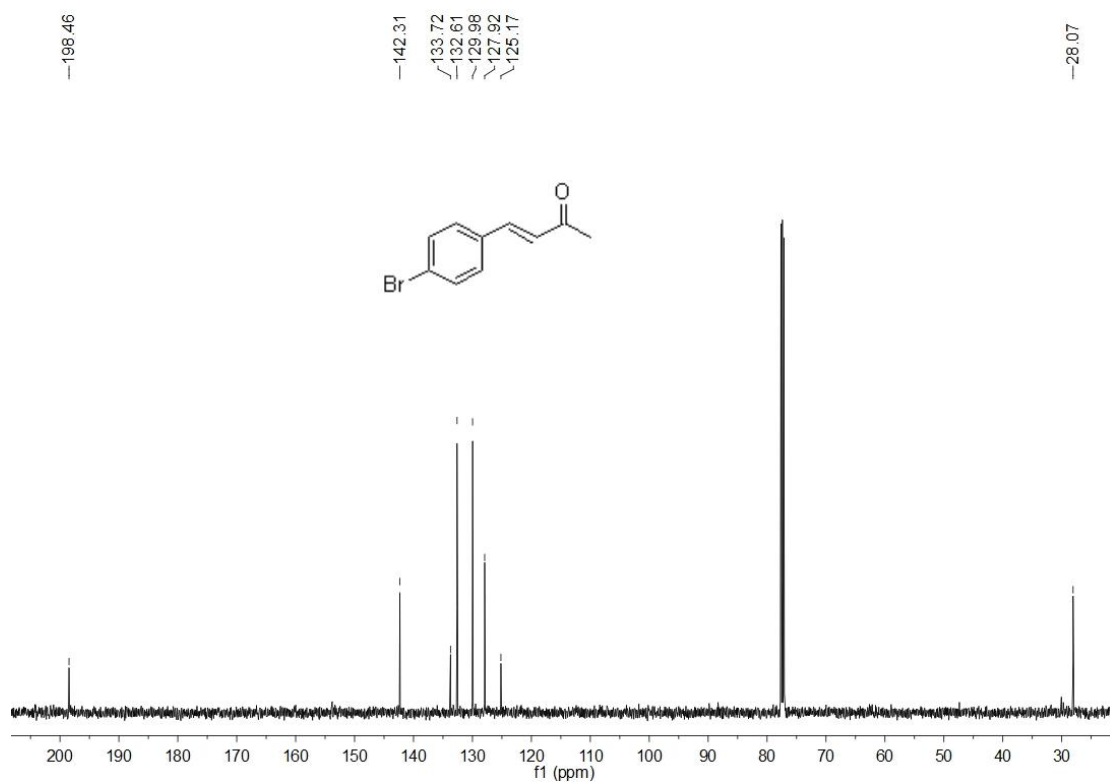

**Fig. S58**  $^{13}\text{C}\{^1\text{H}\}$  NMR spectrum of **6f** (125 MHz,  $\text{CDCl}_3$ )

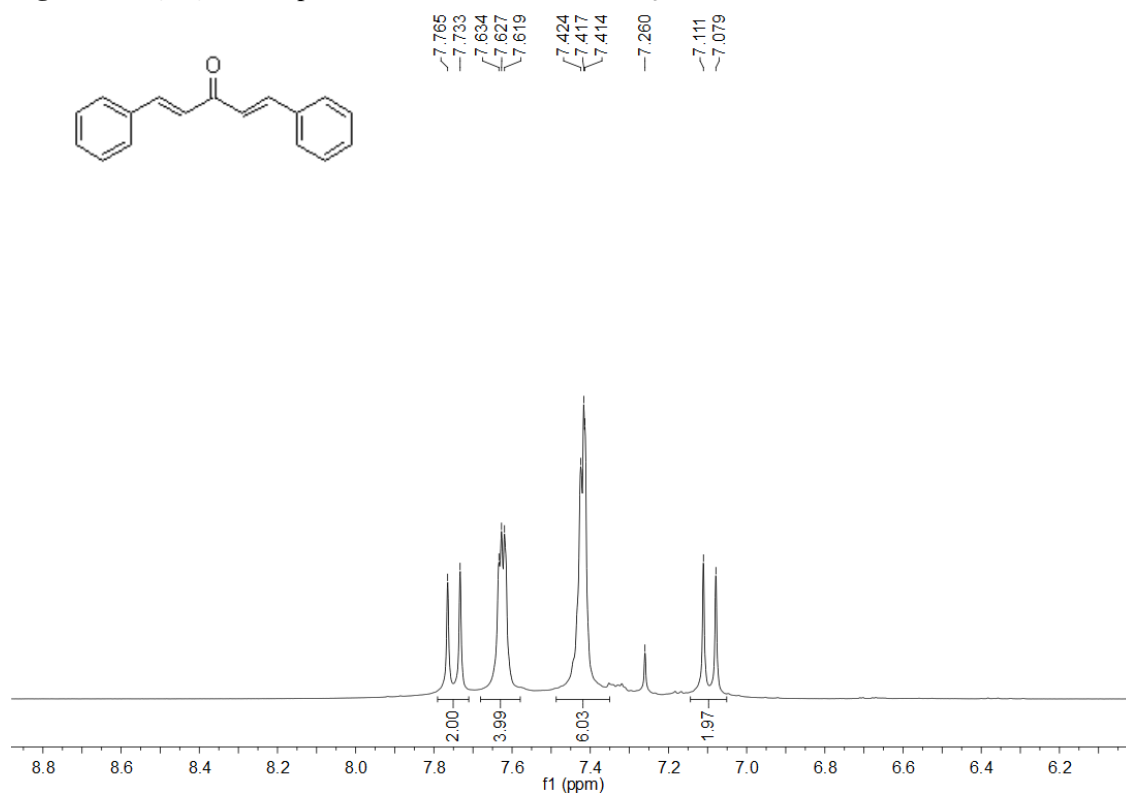

**Fig. S59**  $^1\text{H}$  NMR spectrum of **7aa** (500 MHz,  $\text{CDCl}_3$ )

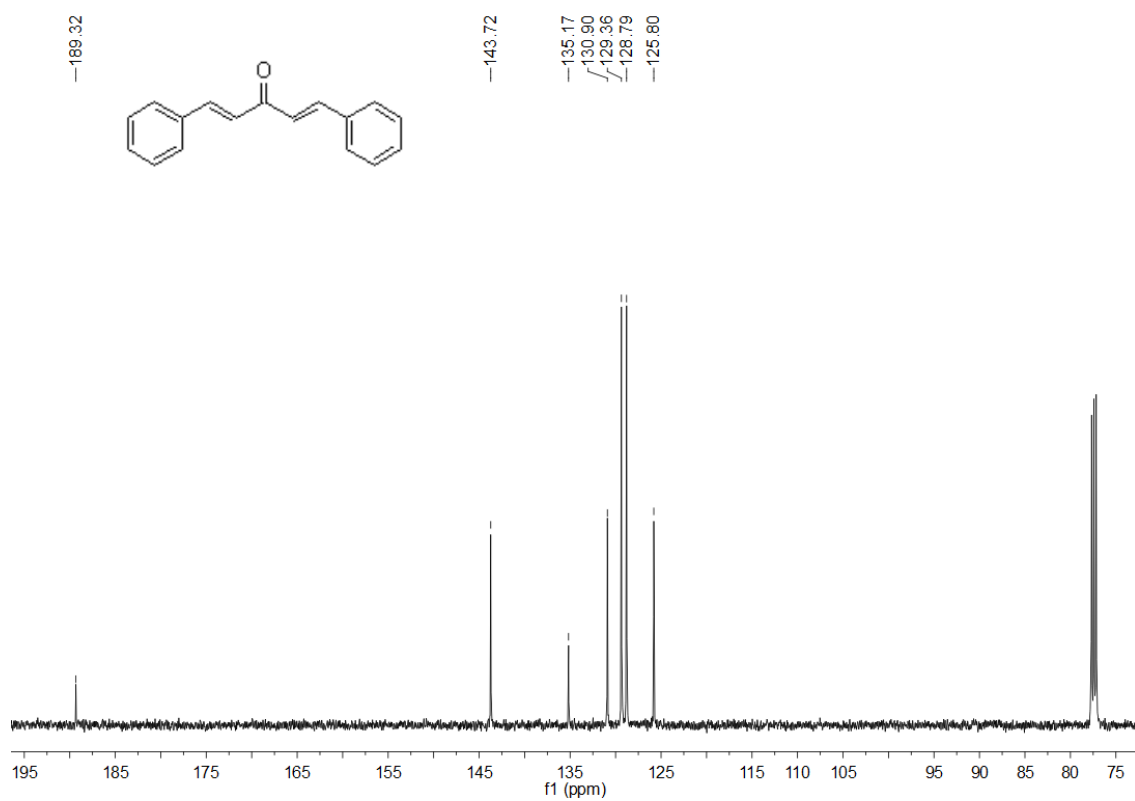

**Fig. S60**  $^{13}\text{C}\{^1\text{H}\}$  NMR spectrum of **7aa** (125 MHz,  $\text{CDCl}_3$ )

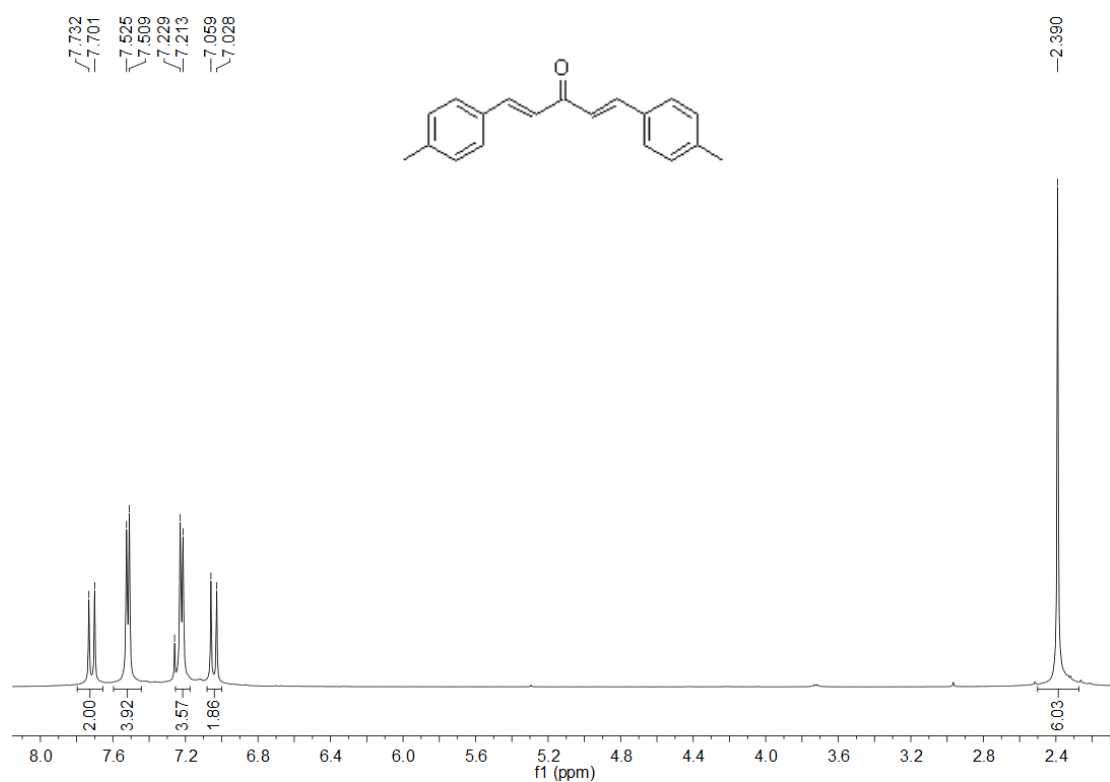

**Fig. S61**  $^1\text{H}$  NMR spectrum of **7bb** (500 MHz,  $\text{CDCl}_3$ )

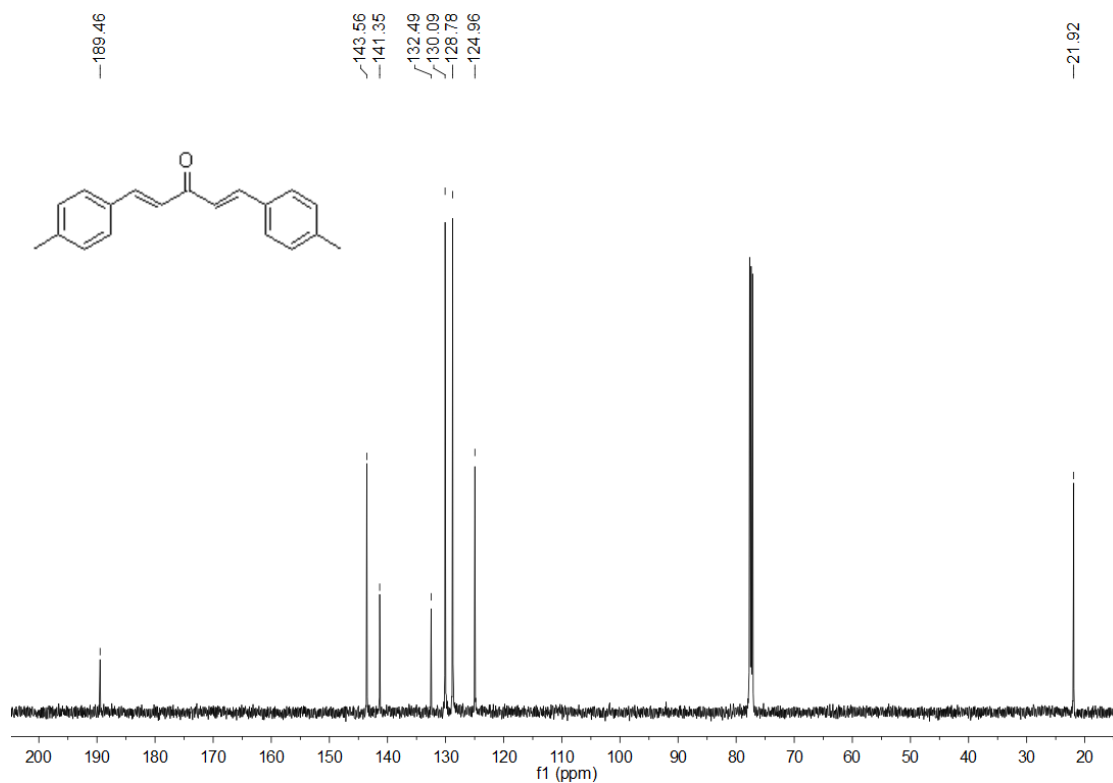

**Fig. S62**  $^{13}\text{C}\{^1\text{H}\}$  NMR spectrum of **7bb** (125 MHz,  $\text{CDCl}_3$ )

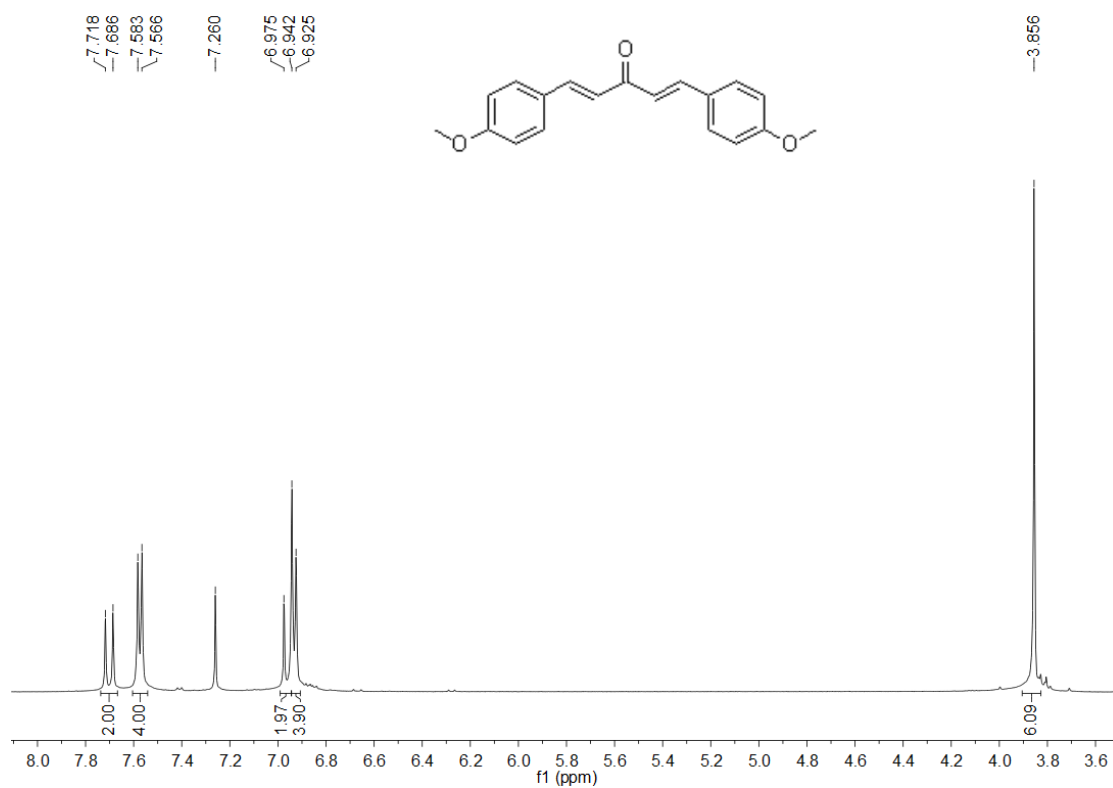

**Fig. S63**  $^1\text{H}$  NMR spectrum of **7cc** (500 MHz,  $\text{CDCl}_3$ )

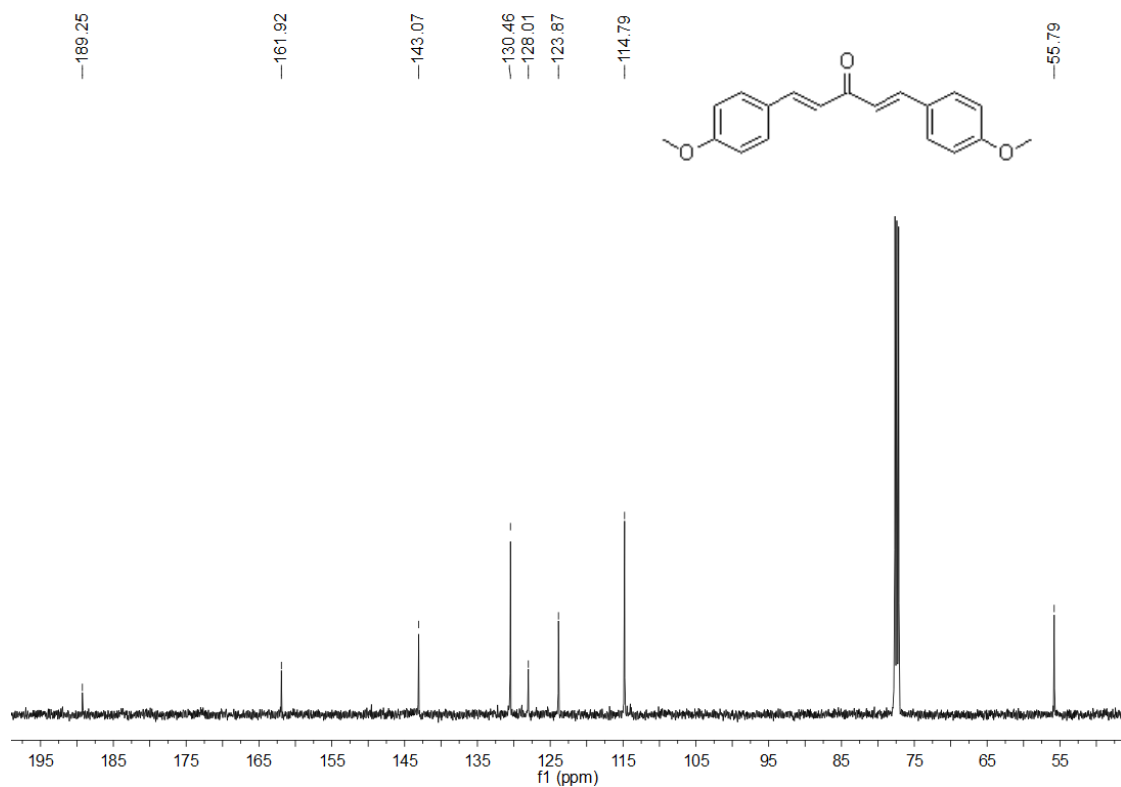

Fig. S64  $^{13}\text{C}\{^1\text{H}\}$  NMR spectrum of 7cc (125 MHz,  $\text{CDCl}_3$ )

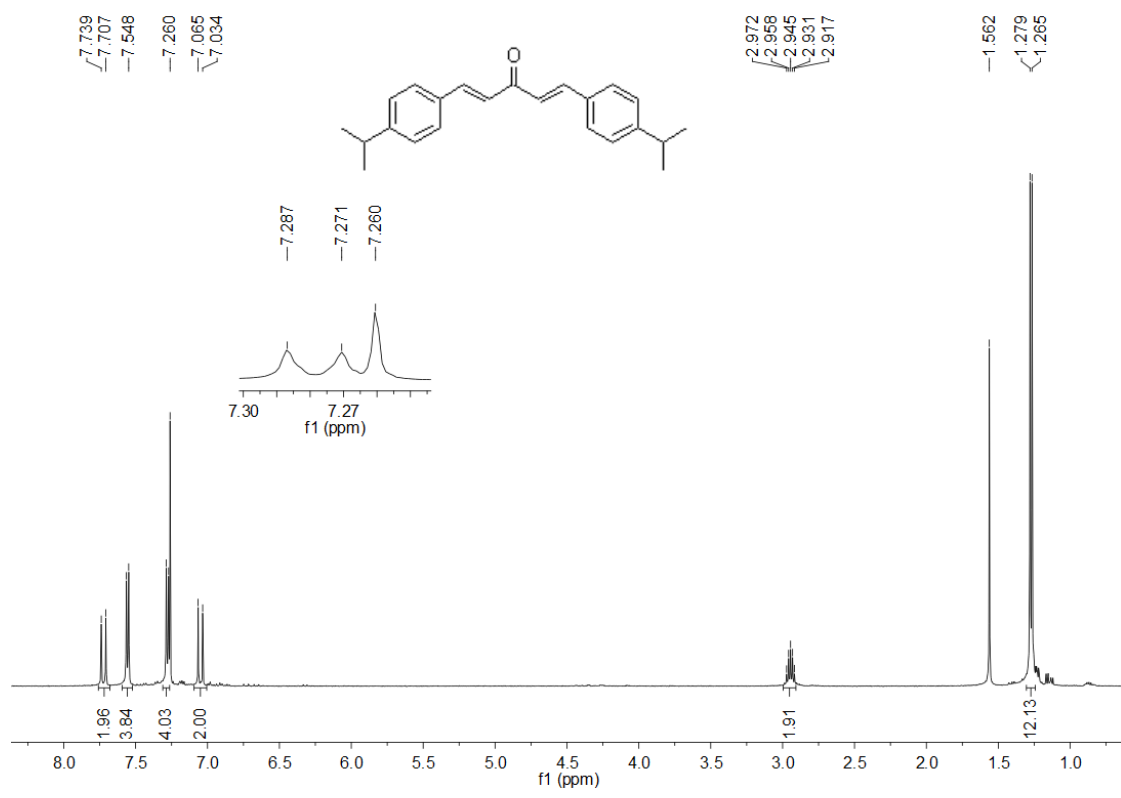

Fig. S65  $^1\text{H}$  NMR spectrum of 7dd (500 MHz,  $\text{CDCl}_3$ )

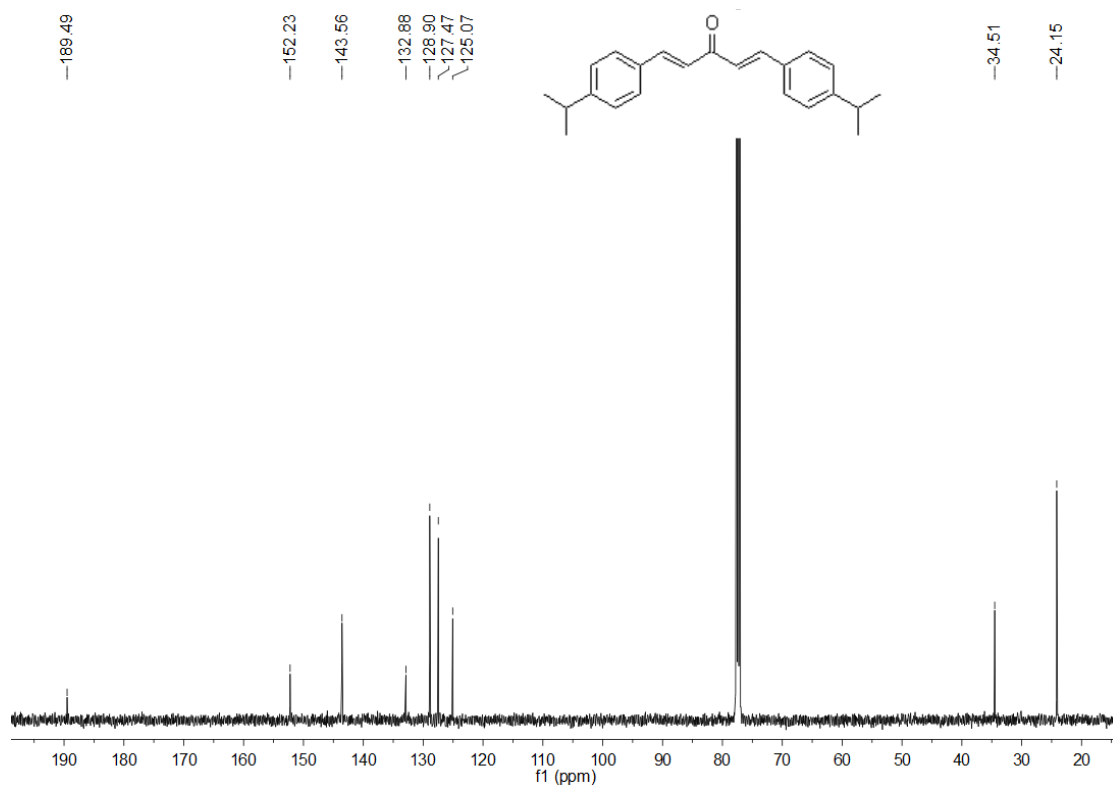

**Fig. S66**  $^{13}\text{C}\{^1\text{H}\}$  NMR spectrum of **7dd** (125 MHz,  $\text{CDCl}_3$ )

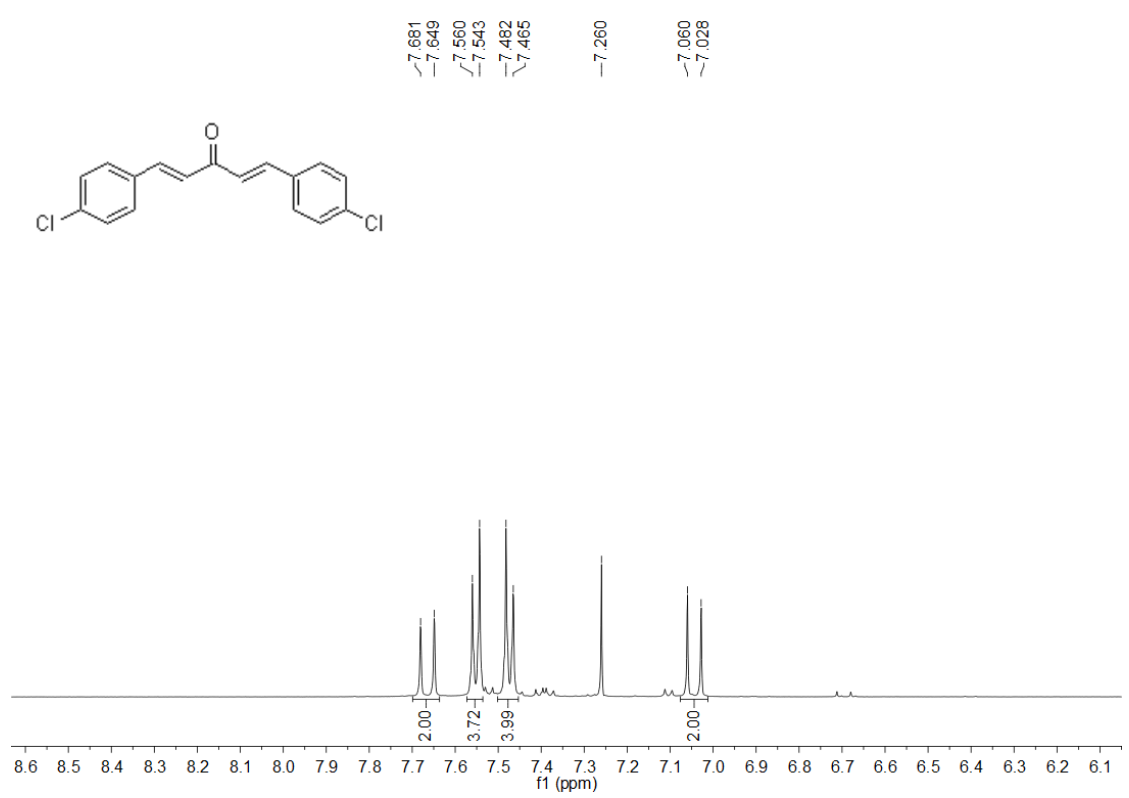

**Fig. S67**  $^1\text{H}$  NMR spectrum of **7ee** (500 MHz,  $\text{CDCl}_3$ )

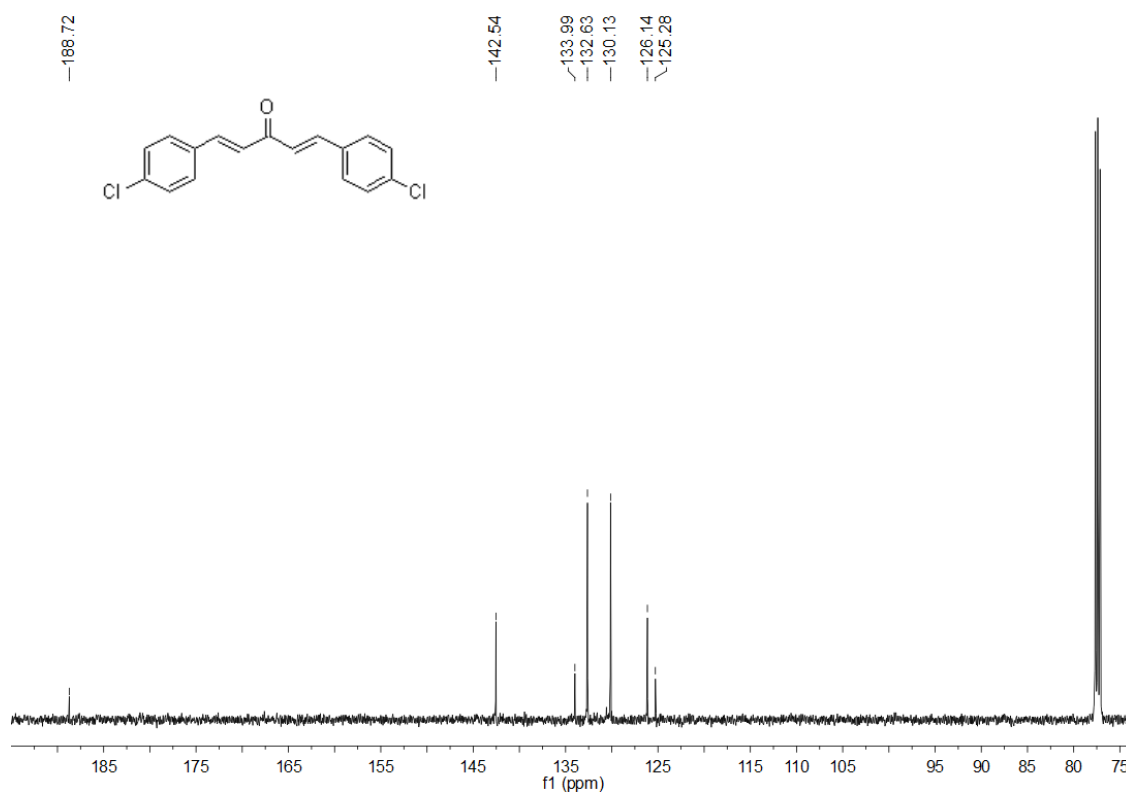

Fig. S68  $^{13}\text{C}\{^1\text{H}\}$  NMR spectrum of **7ee** (125 MHz,  $\text{CDCl}_3$ )

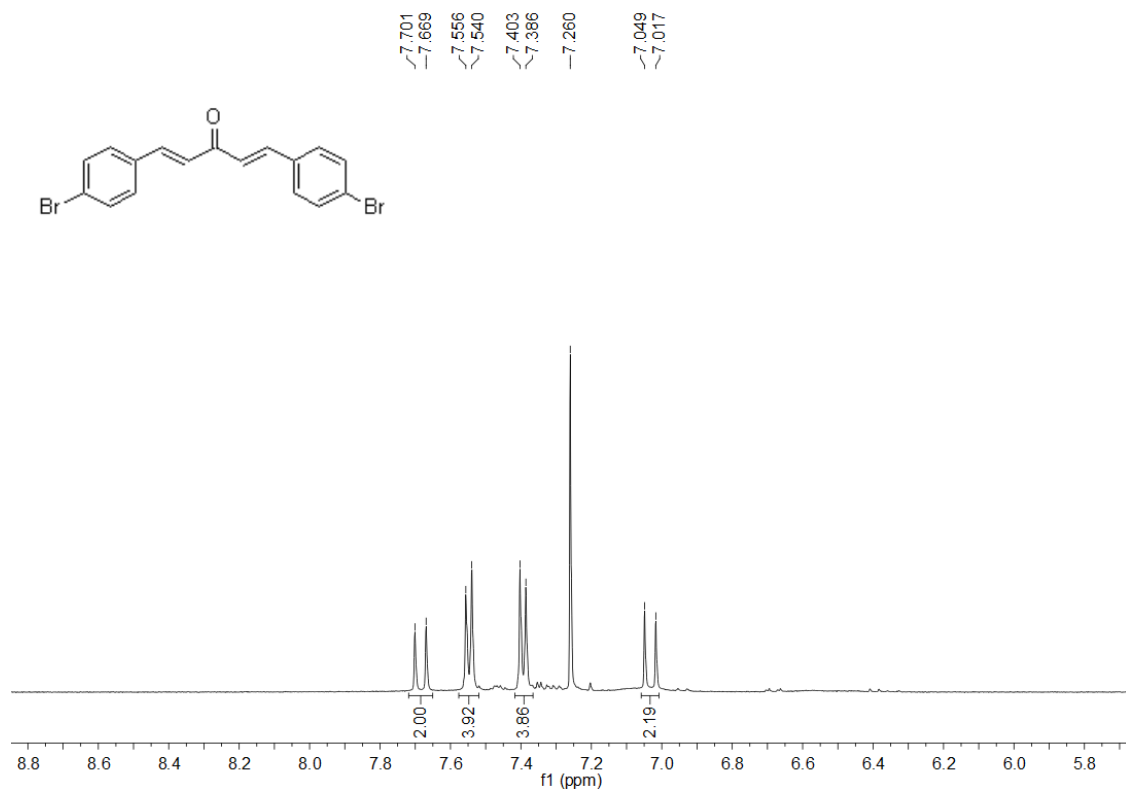

Fig. S69  $^1\text{H}$  NMR spectrum of **7ff** (500 MHz,  $\text{CDCl}_3$ )

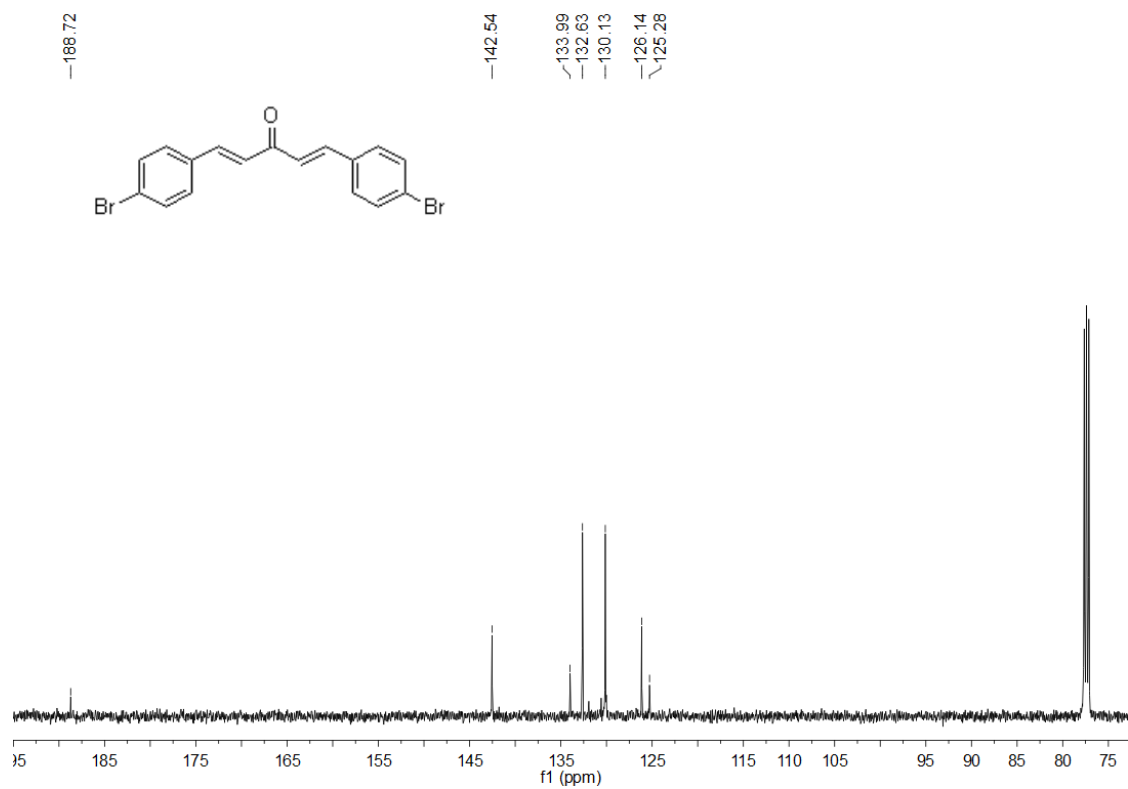

**Fig. S70**  $^{13}\text{C}\{^1\text{H}\}$  NMR spectrum of **7ff** (125 MHz,  $\text{CDCl}_3$ )

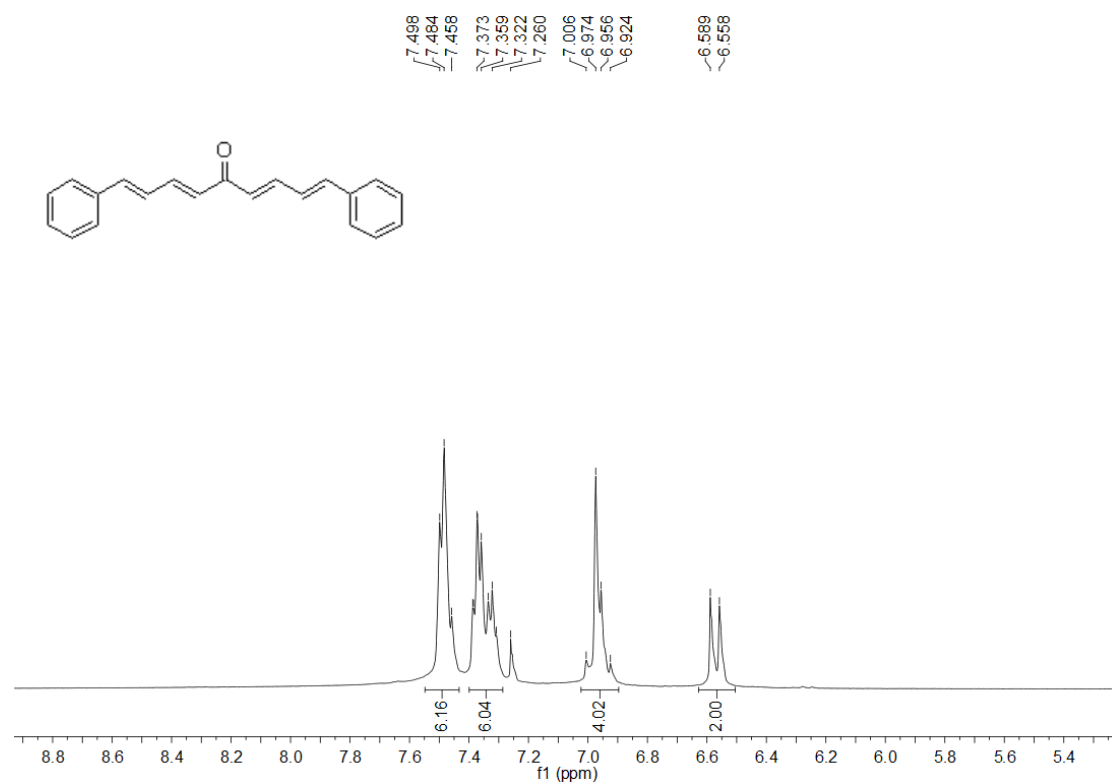

**Fig. S71**  $^1\text{H}$  NMR spectrum of **7gg** (500 MHz,  $\text{CDCl}_3$ )

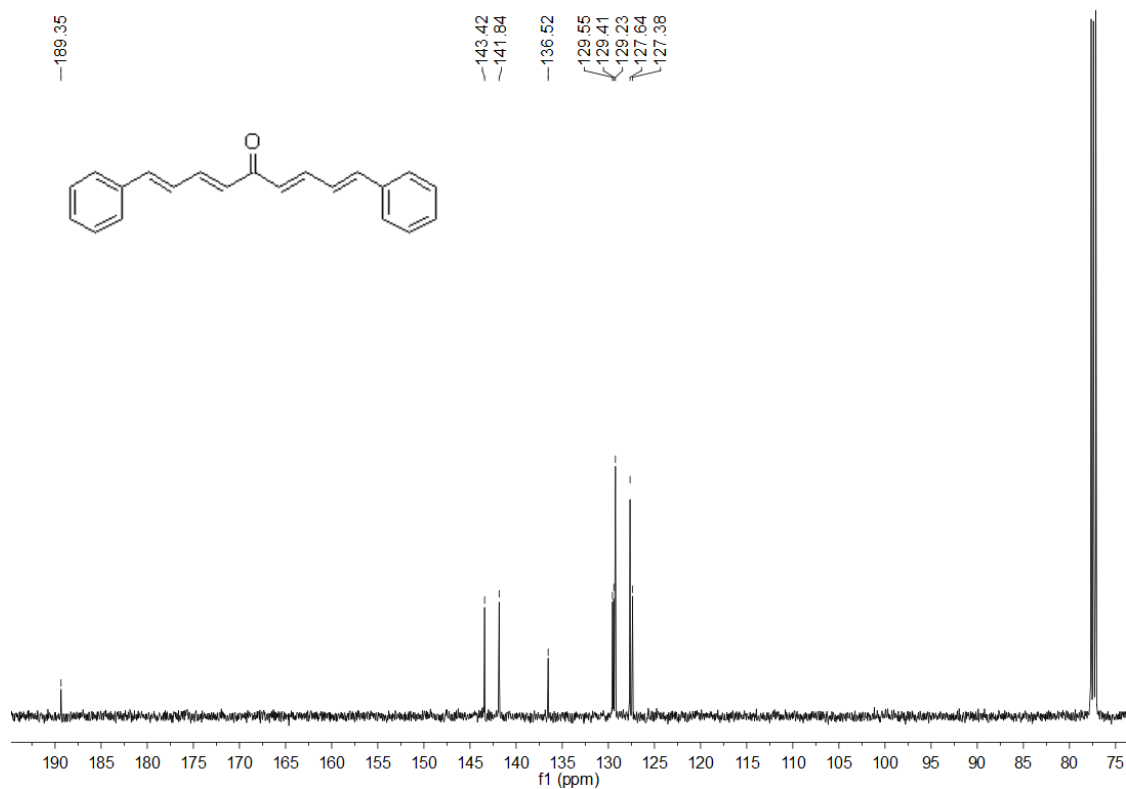

**Fig. S72**  $^{13}\text{C}\{^1\text{H}\}$  NMR spectrum of **7gg** (125 MHz,  $\text{CDCl}_3$ )

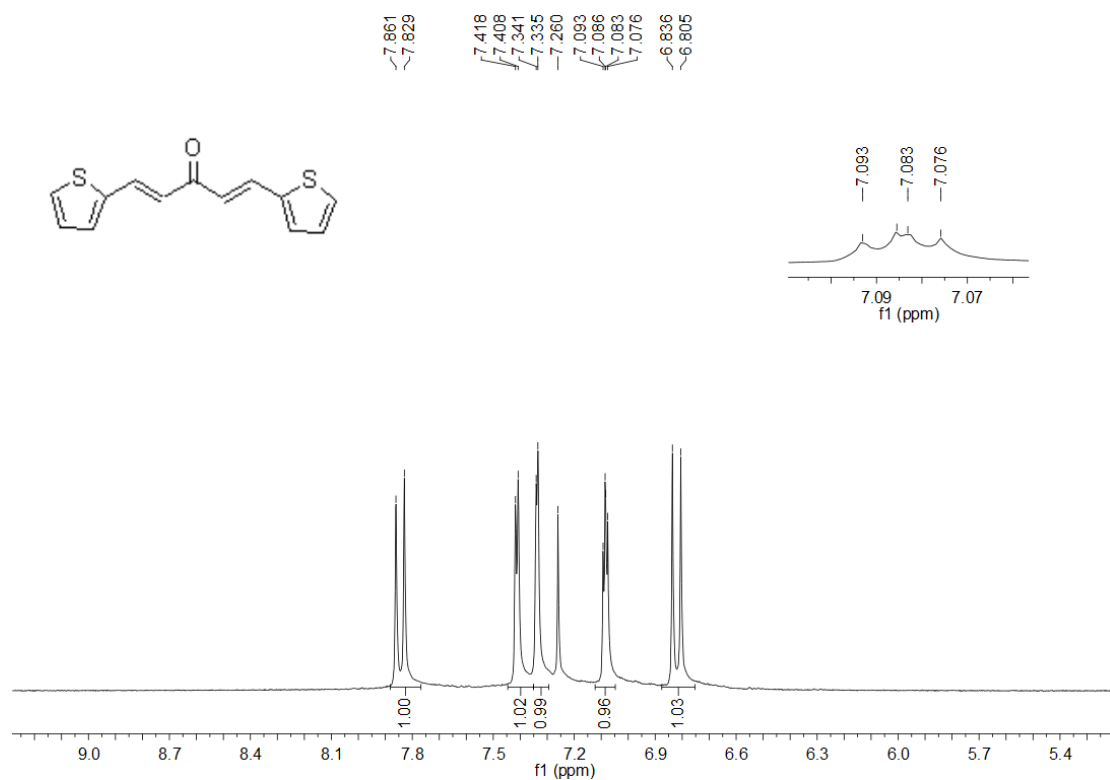

**Fig. S73**  $^1\text{H}$  NMR spectrum of **7hh** (500 MHz,  $\text{CDCl}_3$ )



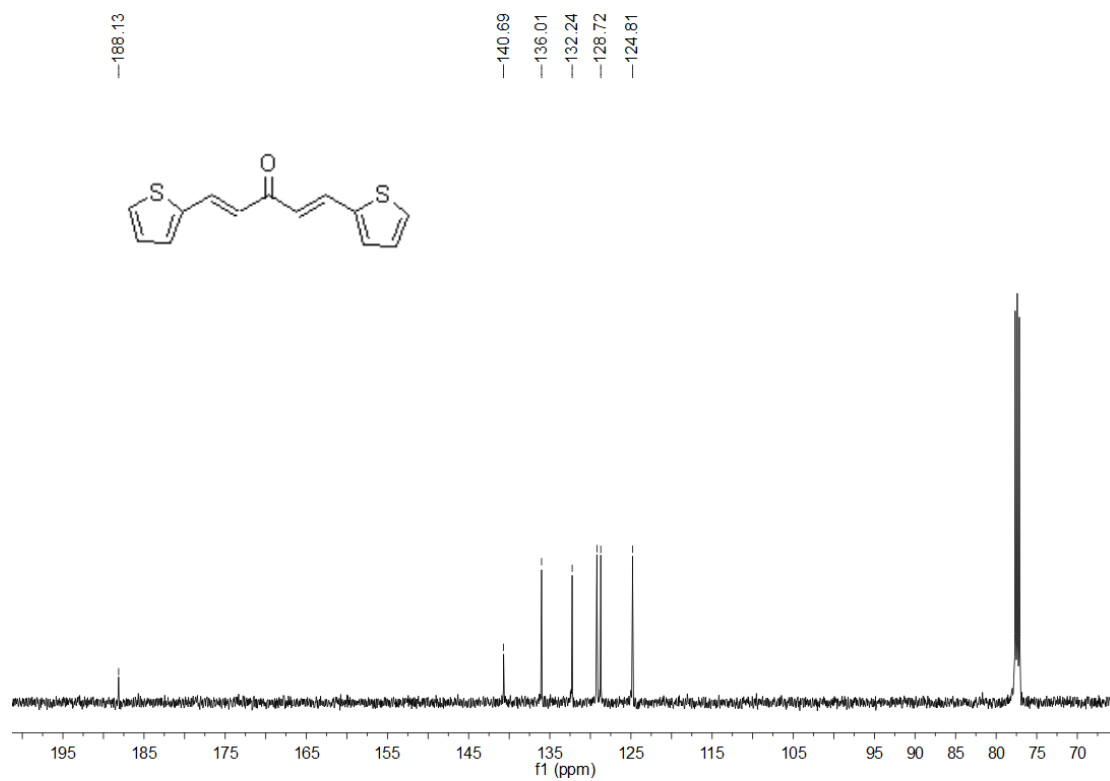

**Fig. S74**  $^{13}\text{C}\{^1\text{H}\}$  NMR spectrum of **7hh** (125 MHz,  $\text{CDCl}_3$ )

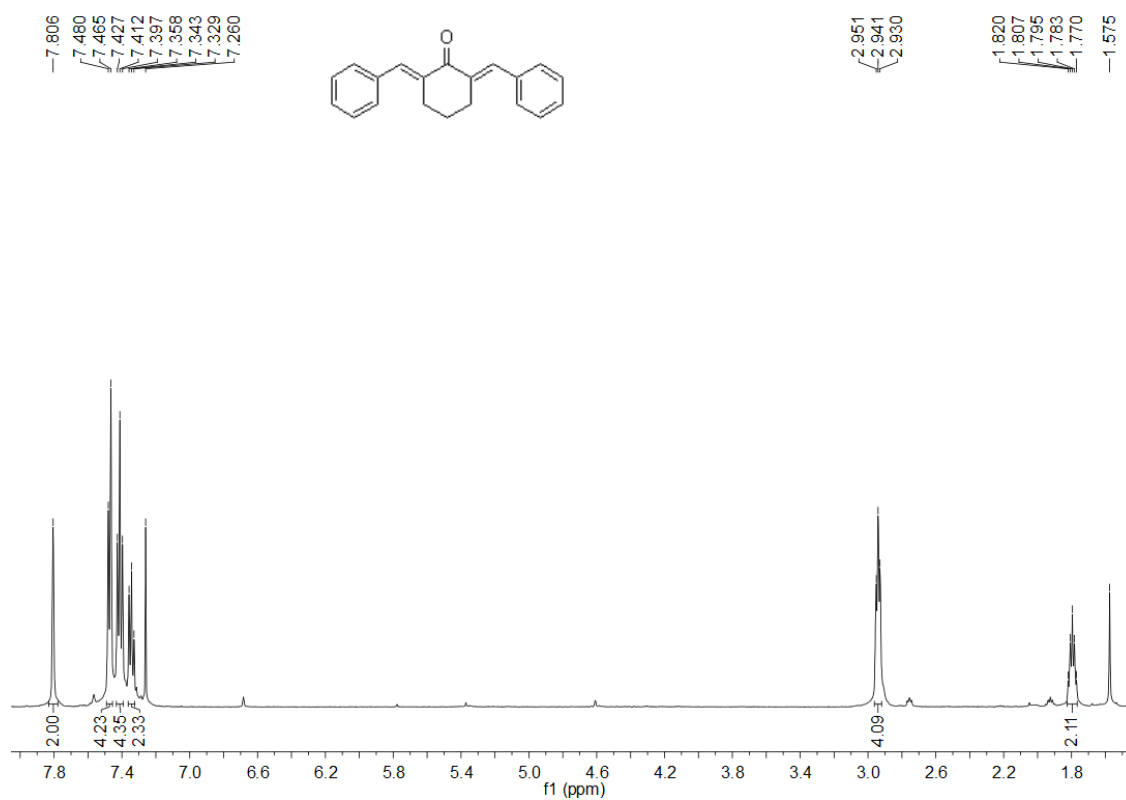

**Fig. S75**  $^1\text{H}$  NMR spectrum of **8aa** (500 MHz,  $\text{CDCl}_3$ )

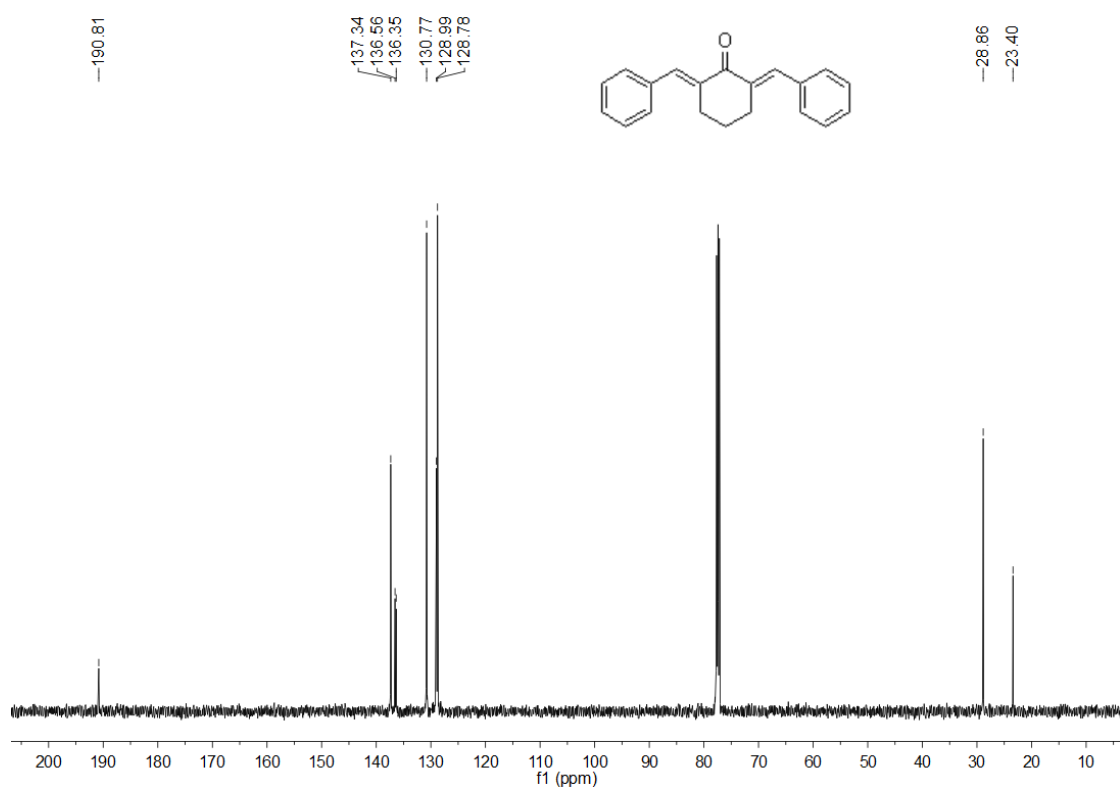

**Fig. S76**  $^{13}\text{C}\{^1\text{H}\}$  NMR spectrum of **8aa** (125 MHz,  $\text{CDCl}_3$ )

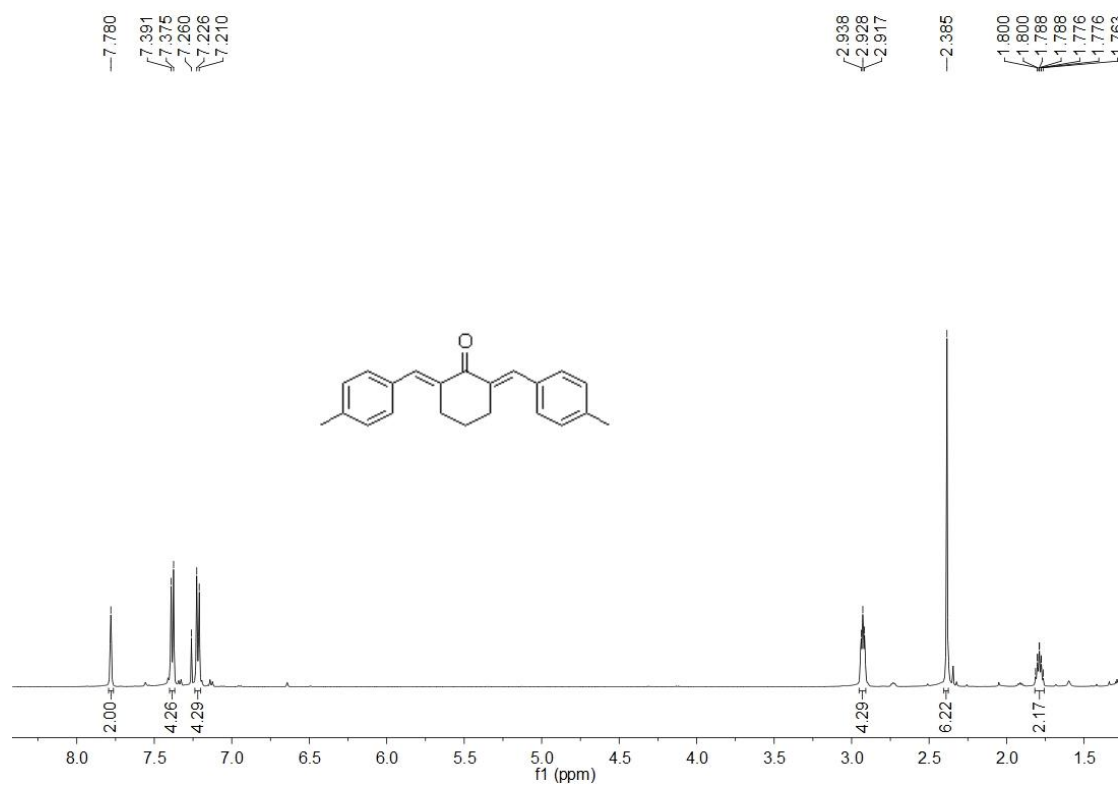

**Fig. S77**  $^1\text{H}$  NMR spectrum of **8bb** (500 MHz,  $\text{CDCl}_3$ )

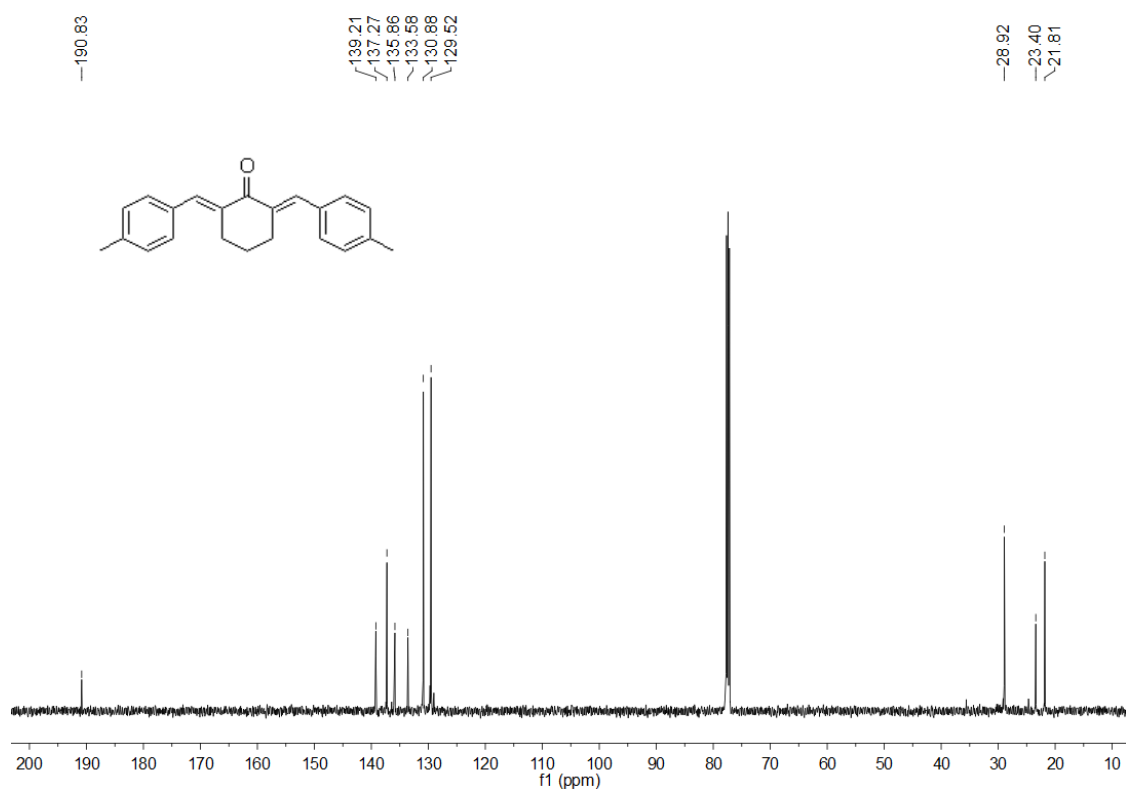

**Fig. S78**  $^{13}\text{C}\{^1\text{H}\}$  NMR spectrum of **8bb** (125 MHz,  $\text{CDCl}_3$ )

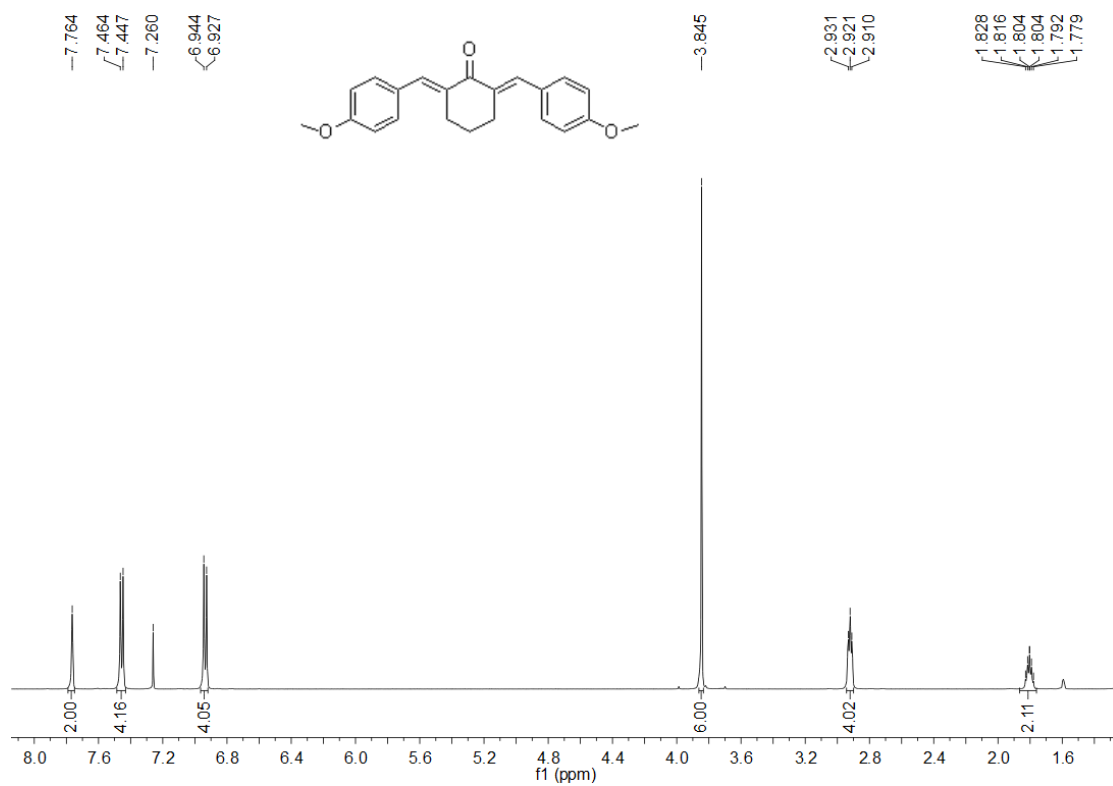

**Fig. S79**  $^1\text{H}$  NMR spectrum of **8cc** (500 MHz,  $\text{CDCl}_3$ )

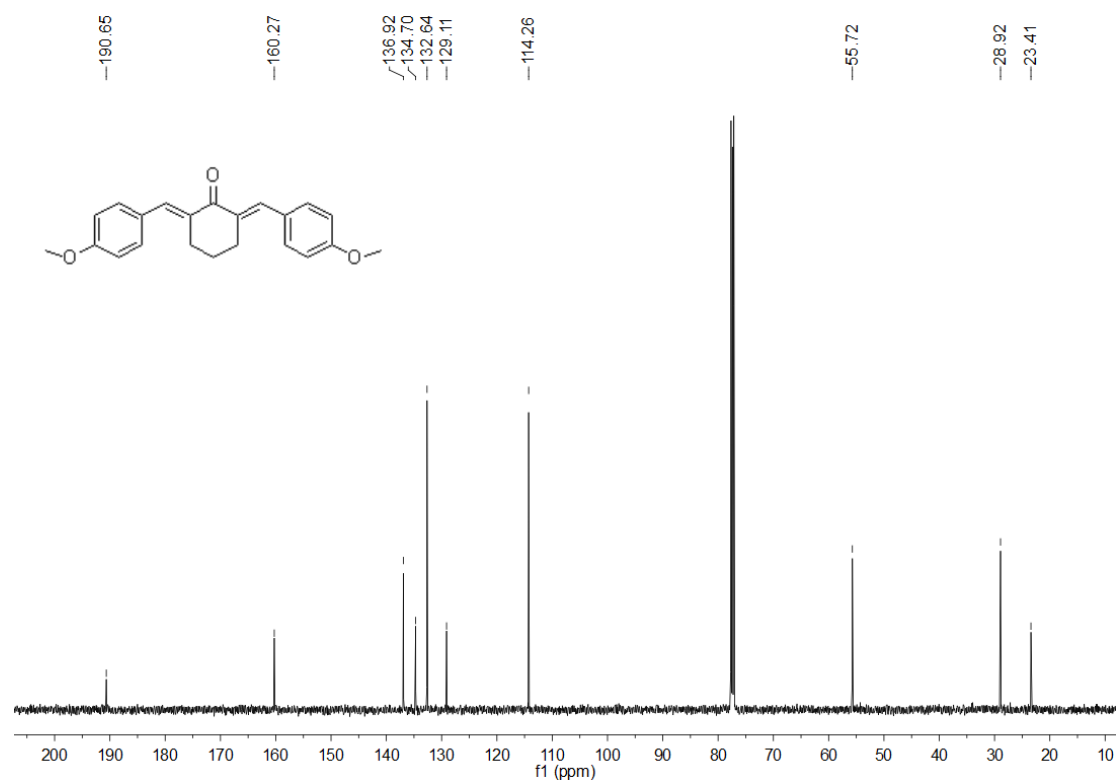

**Fig. S80**  $^{13}\text{C}\{^1\text{H}\}$  NMR spectrum of **8cc** (125 MHz,  $\text{CDCl}_3$ )

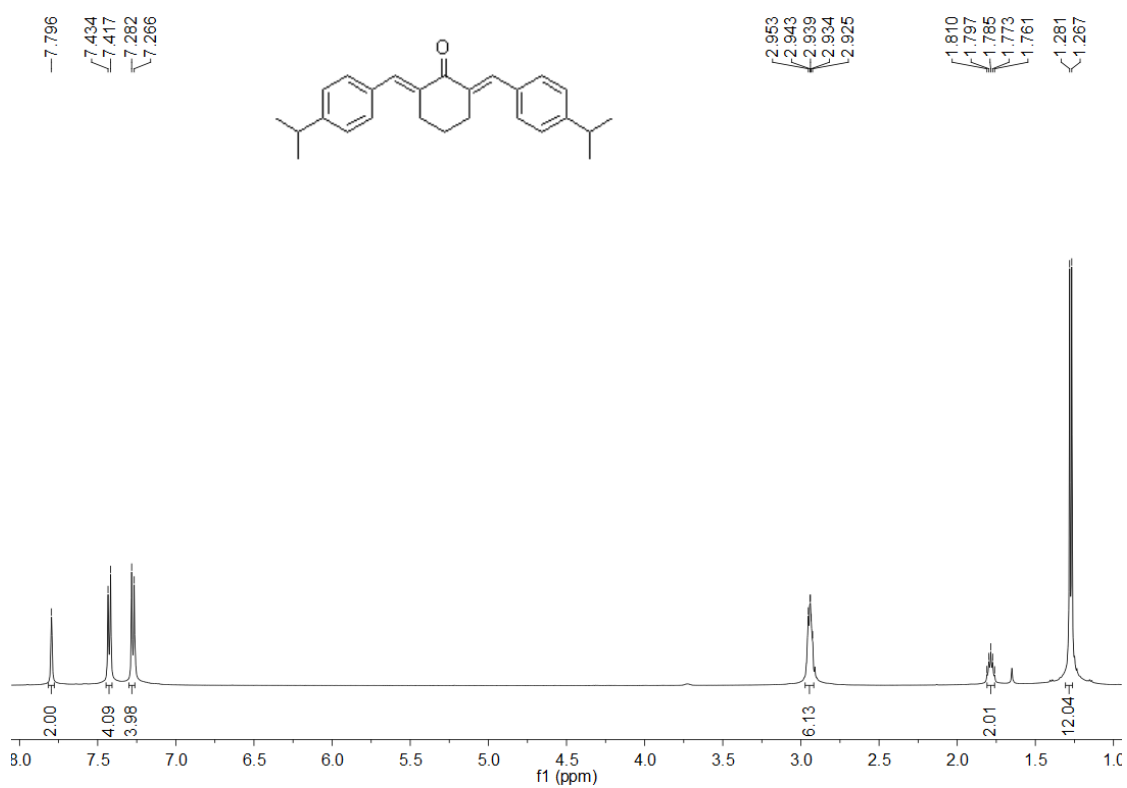

**Fig. S81**  $^1\text{H}$  NMR spectrum of **8dd** (500 MHz,  $\text{CDCl}_3$ )

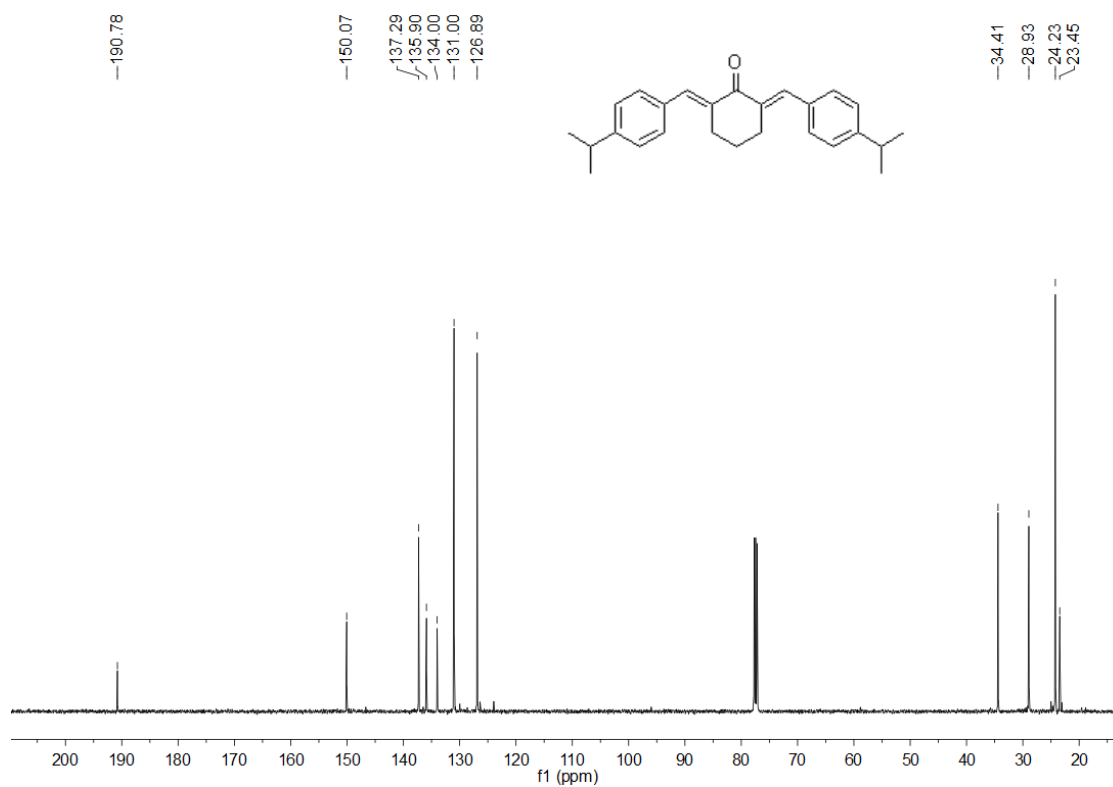

**Fig. S82**  $^{13}\text{C}\{^1\text{H}\}$  NMR spectrum of **8dd** (125 MHz,  $\text{CDCl}_3$ )

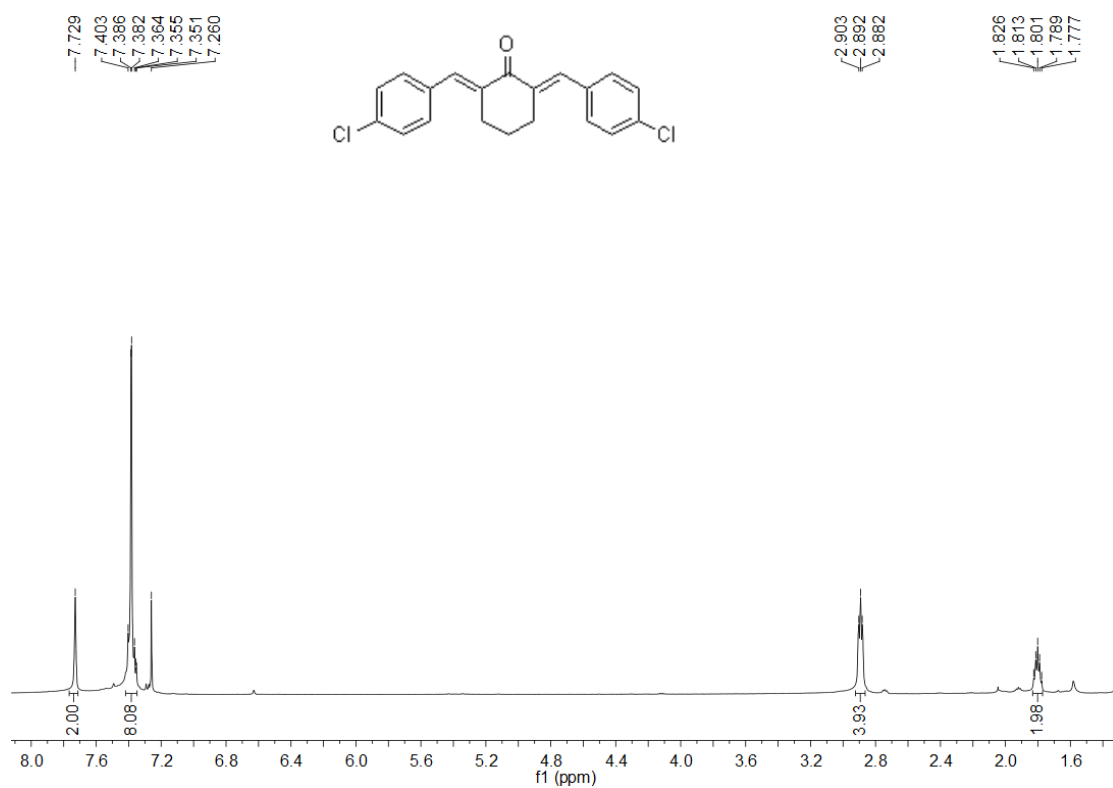

**Fig. S83**  $^1\text{H}$  NMR spectrum of **8ee** (500 MHz,  $\text{CDCl}_3$ )

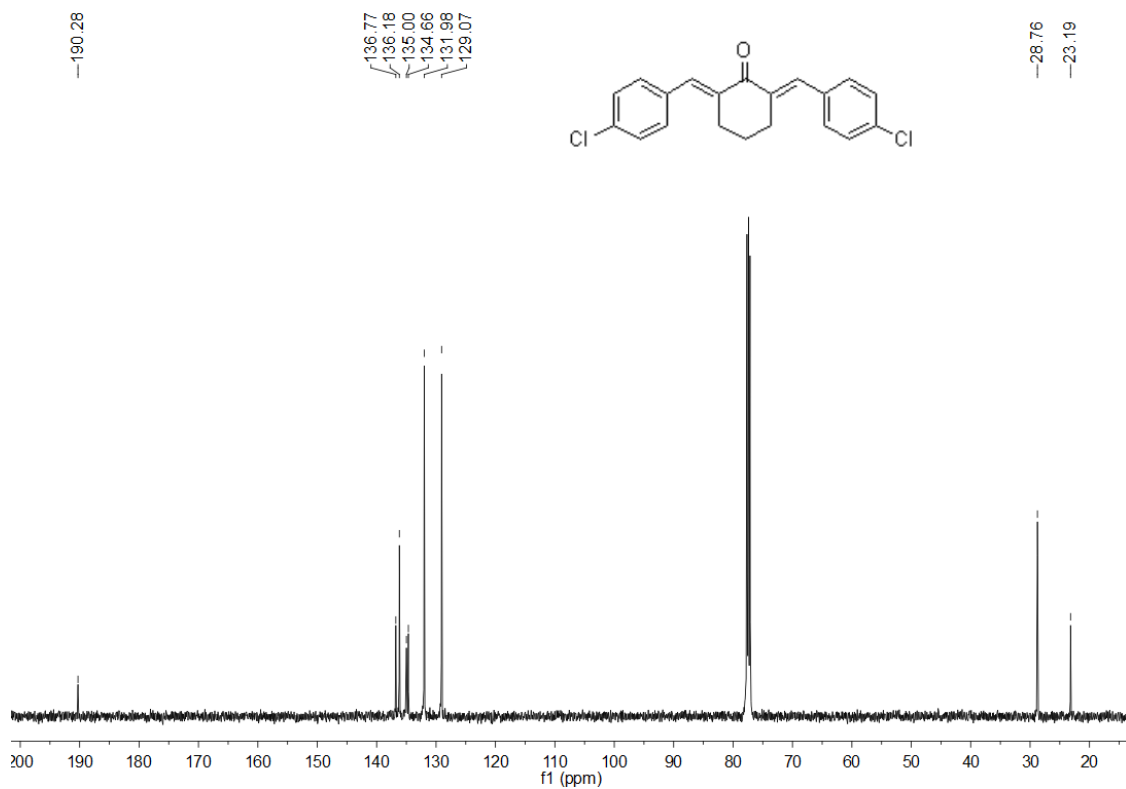

**Fig. S84**  $^{13}\text{C}\{^1\text{H}\}$  NMR spectrum of **8ee** (125 MHz,  $\text{CDCl}_3$ )

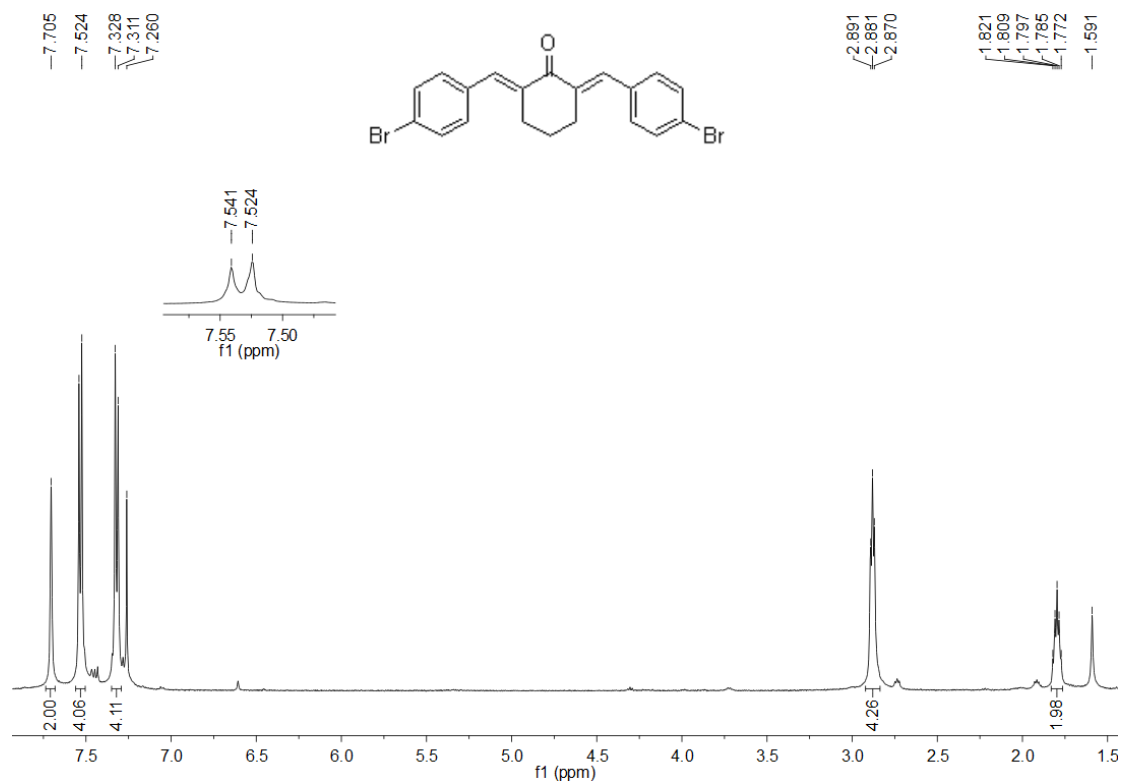

**Fig. S85**  $^1\text{H}$  NMR spectrum of **8ff** (500 MHz,  $\text{CDCl}_3$ )

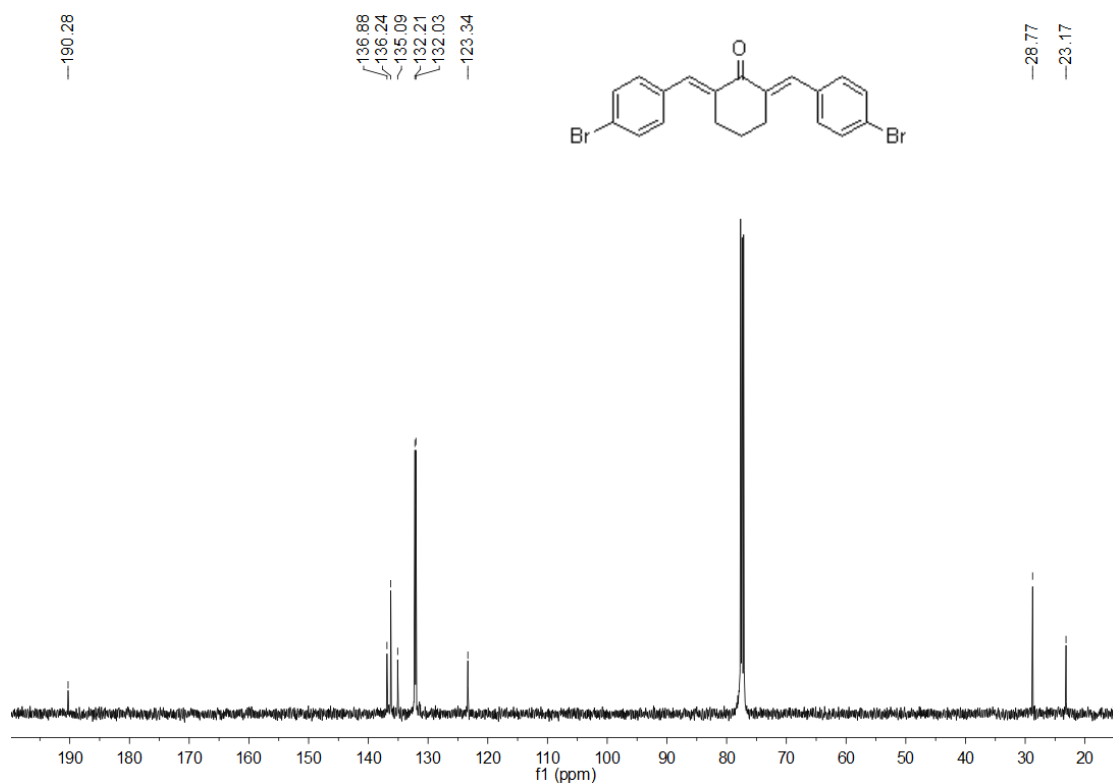

**Fig. S86**  $^{13}\text{C}\{^1\text{H}\}$  NMR spectrum of **8ff** (125 MHz,  $\text{CDCl}_3$ )

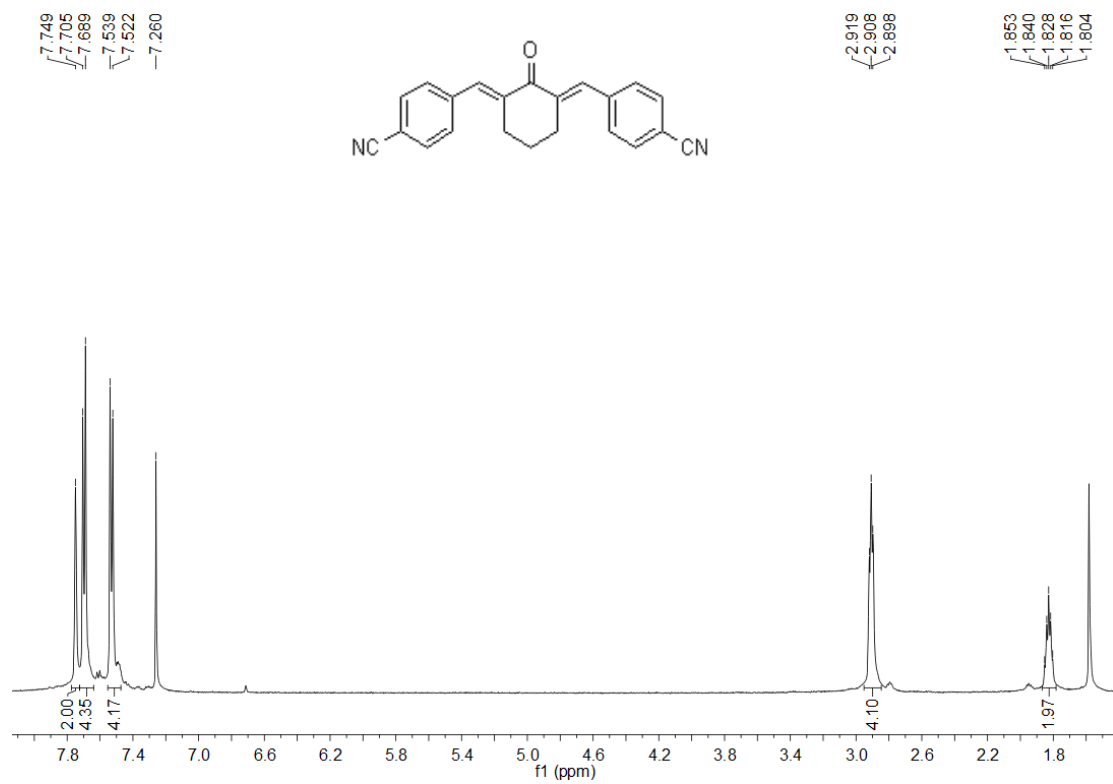

**Fig. S87**  $^1\text{H}$  NMR spectrum of **8gg** (500 MHz,  $\text{CDCl}_3$ )

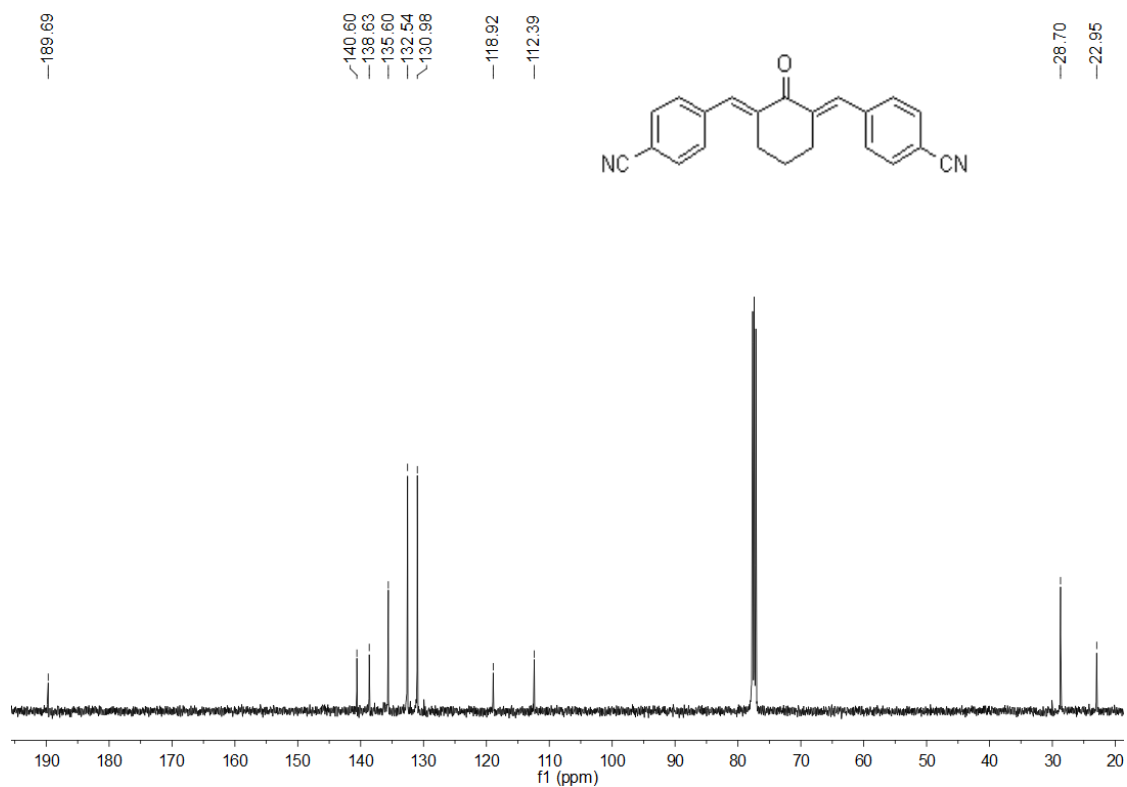

**Fig. S88**  $^{13}\text{C}\{^1\text{H}\}$  NMR spectrum of **8gg** (125 MHz,  $\text{CDCl}_3$ )

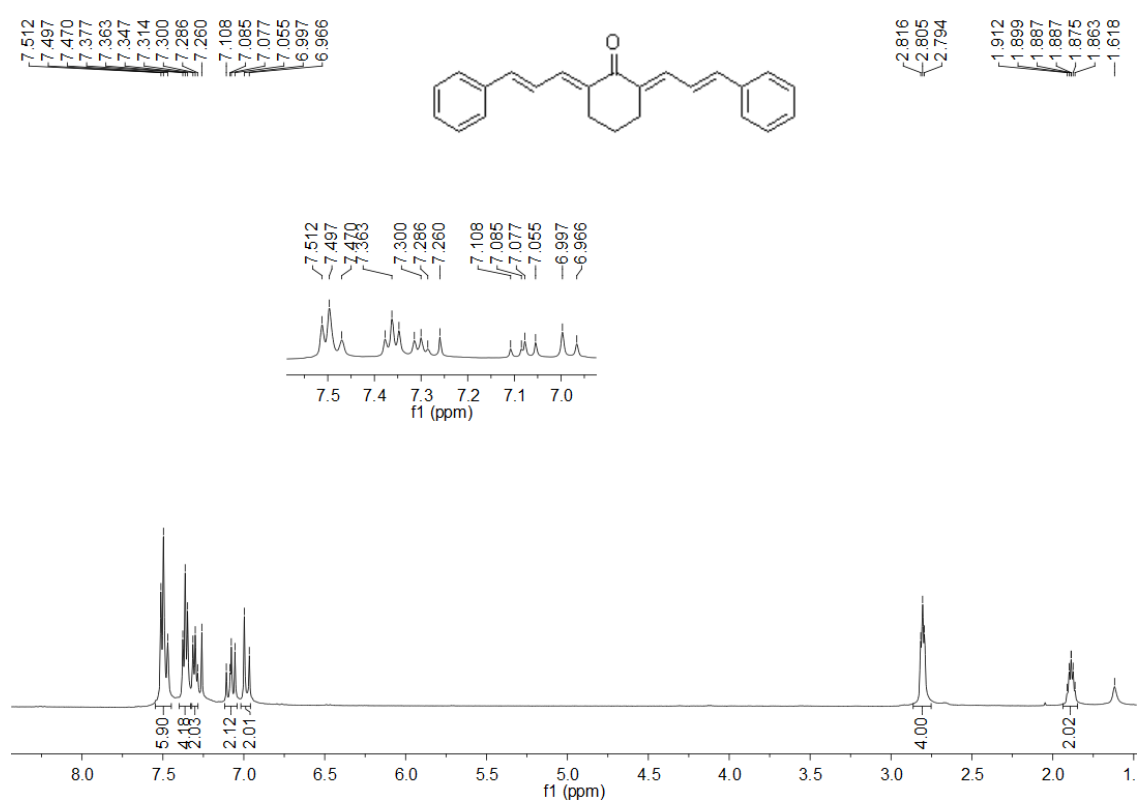

**Fig. S89**  $^1\text{H}$  NMR spectrum of **8hh** (500 MHz,  $\text{CDCl}_3$ )



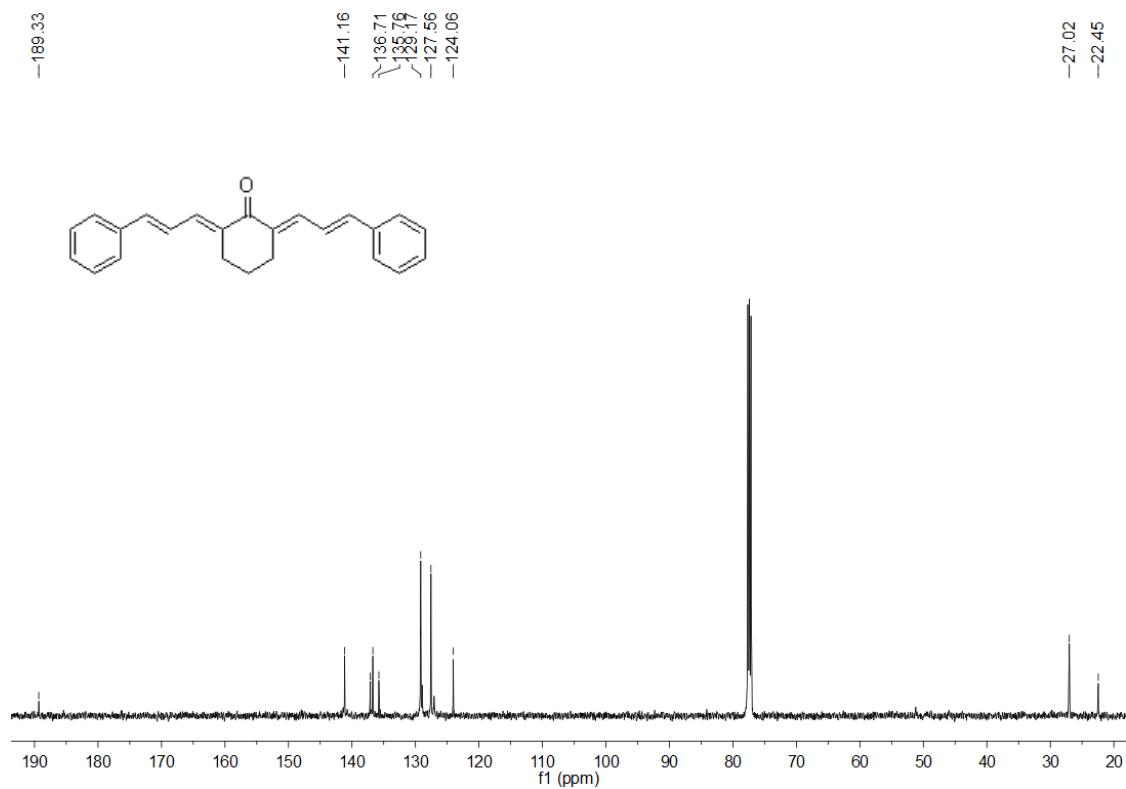

**Fig. S90**  $^{13}\text{C}\{^1\text{H}\}$  NMR spectrum of **8hh** (125 MHz,  $\text{CDCl}_3$ )

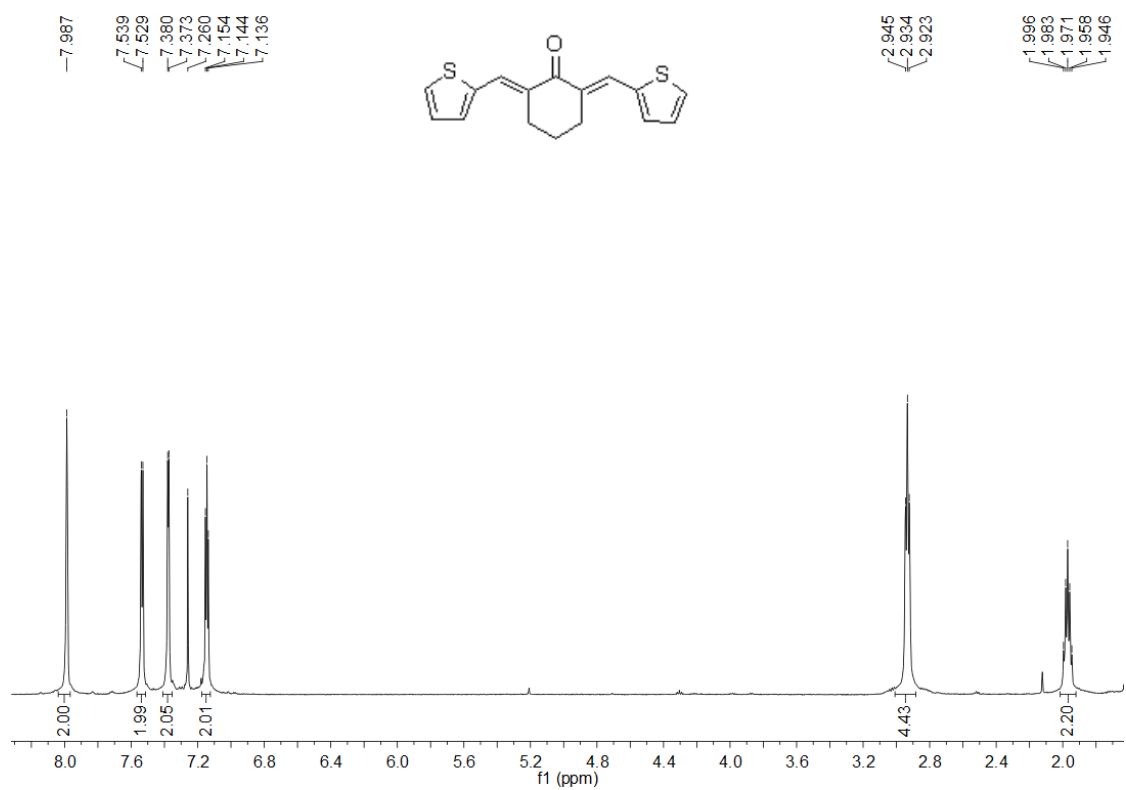

**Fig. S91**  $^1\text{H}$  NMR spectrum of **8ii** (500 MHz,  $\text{CDCl}_3$ )

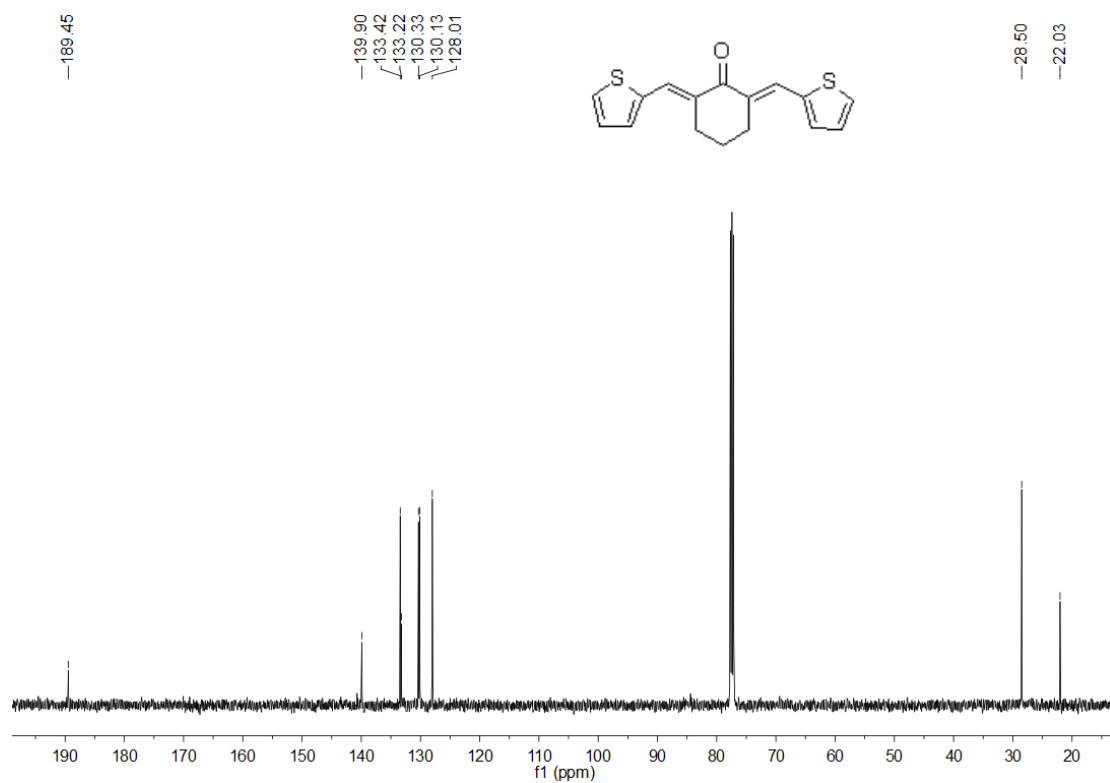

**Fig. S92**  $^{13}\text{C}\{^1\text{H}\}$  NMR spectrum of **8ii** (125 MHz,  $\text{CDCl}_3$ )

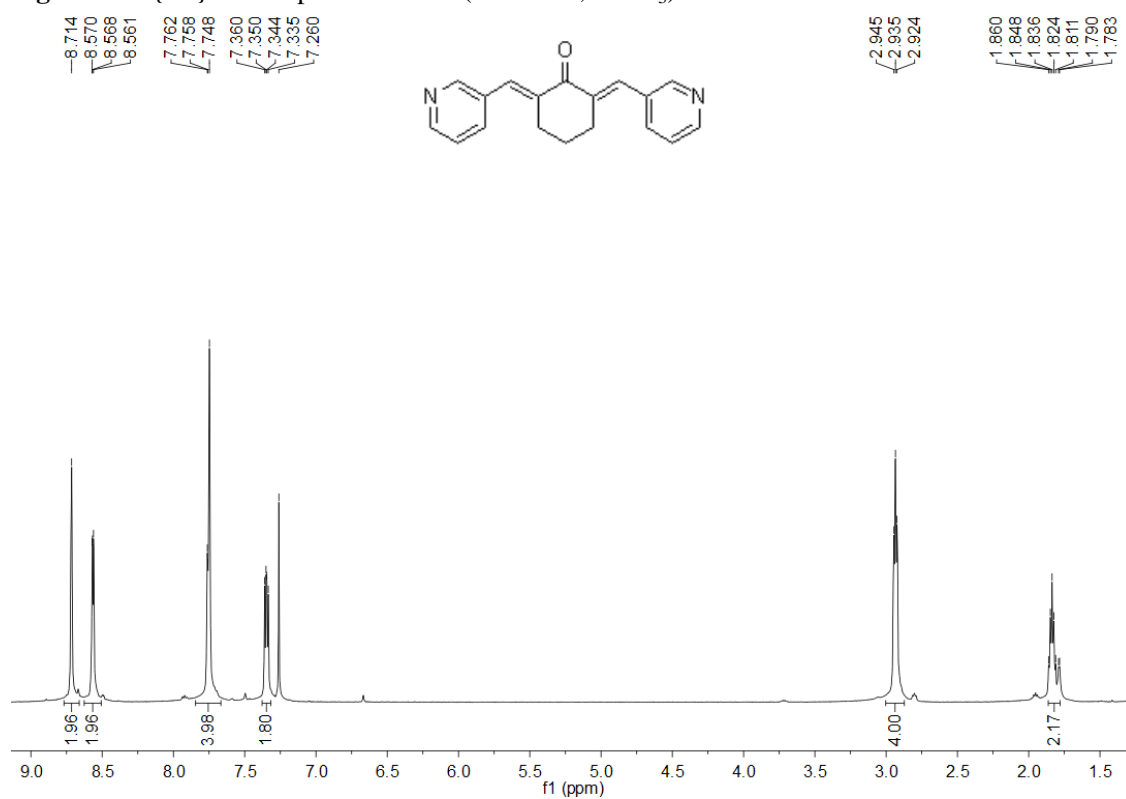

**Fig. S93**  $^1\text{H}$  NMR spectrum of **8jj** (500 MHz,  $\text{CDCl}_3$ )

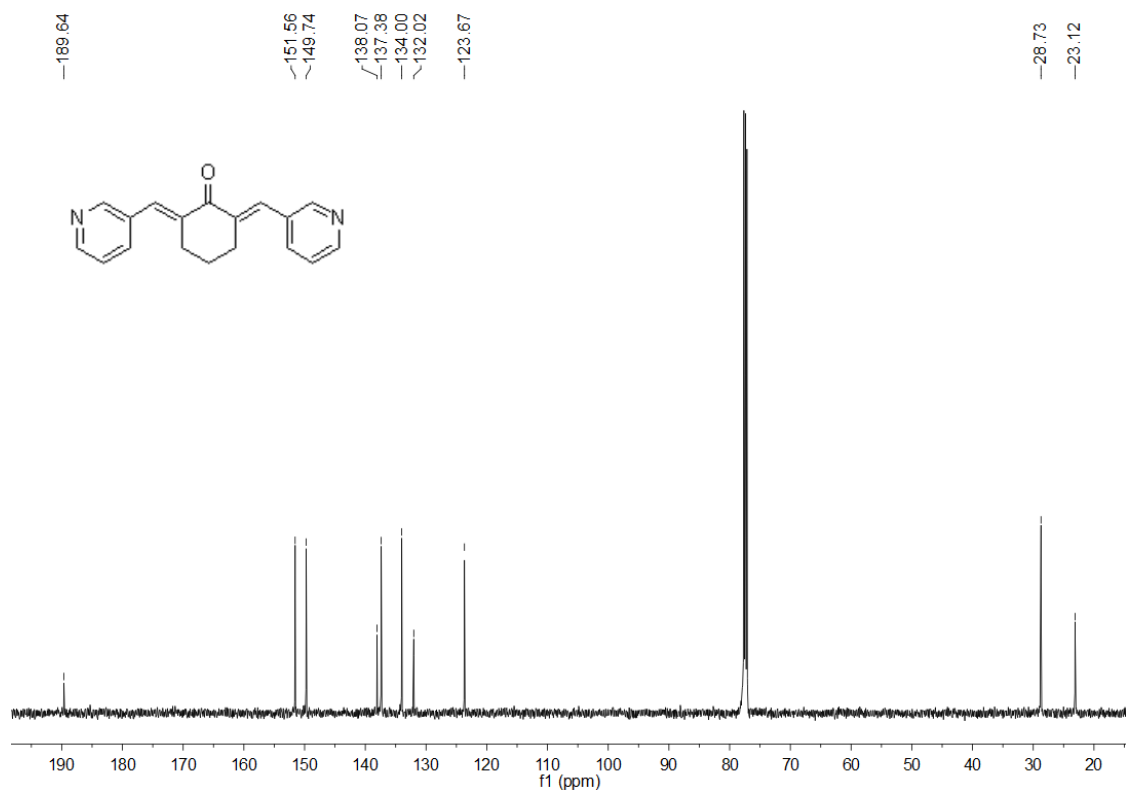

**Fig. S94**  $^{13}\text{C}\{^1\text{H}\}$  NMR spectrum of **8jj** (125 MHz,  $\text{CDCl}_3$ )

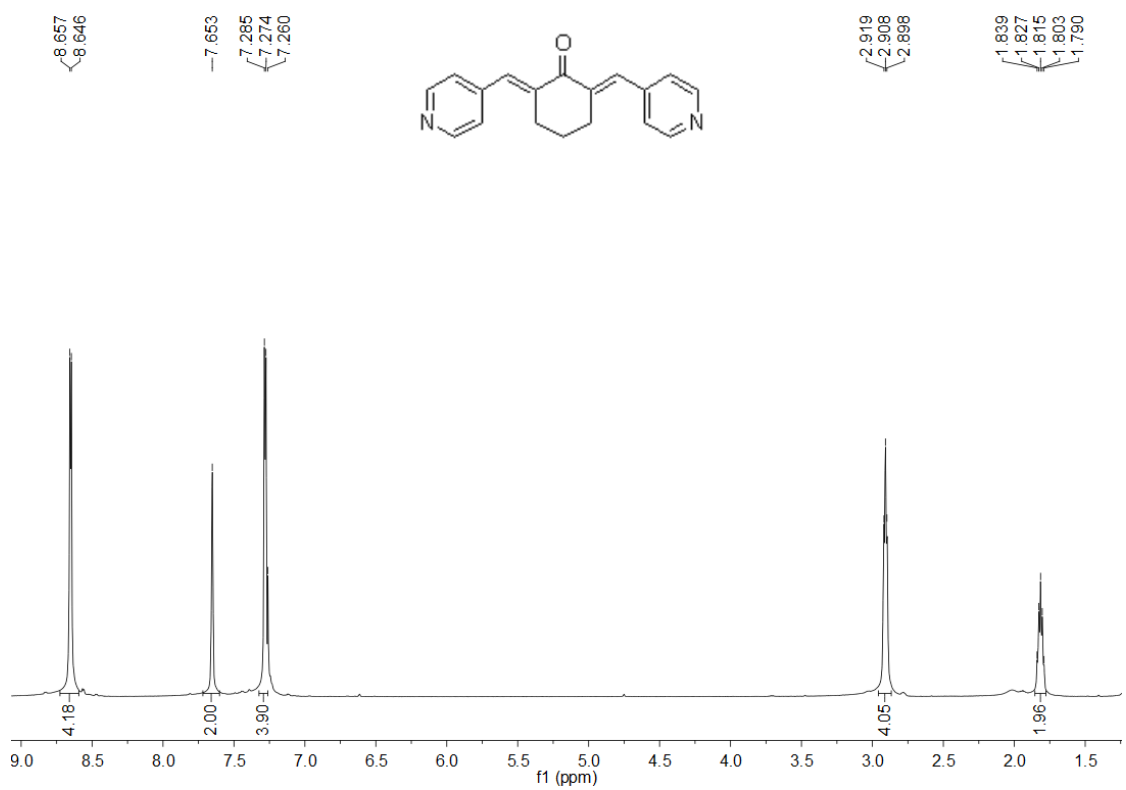

**Fig. S95**  $^1\text{H}$  NMR spectrum of **8kk** (500 MHz,  $\text{CDCl}_3$ )

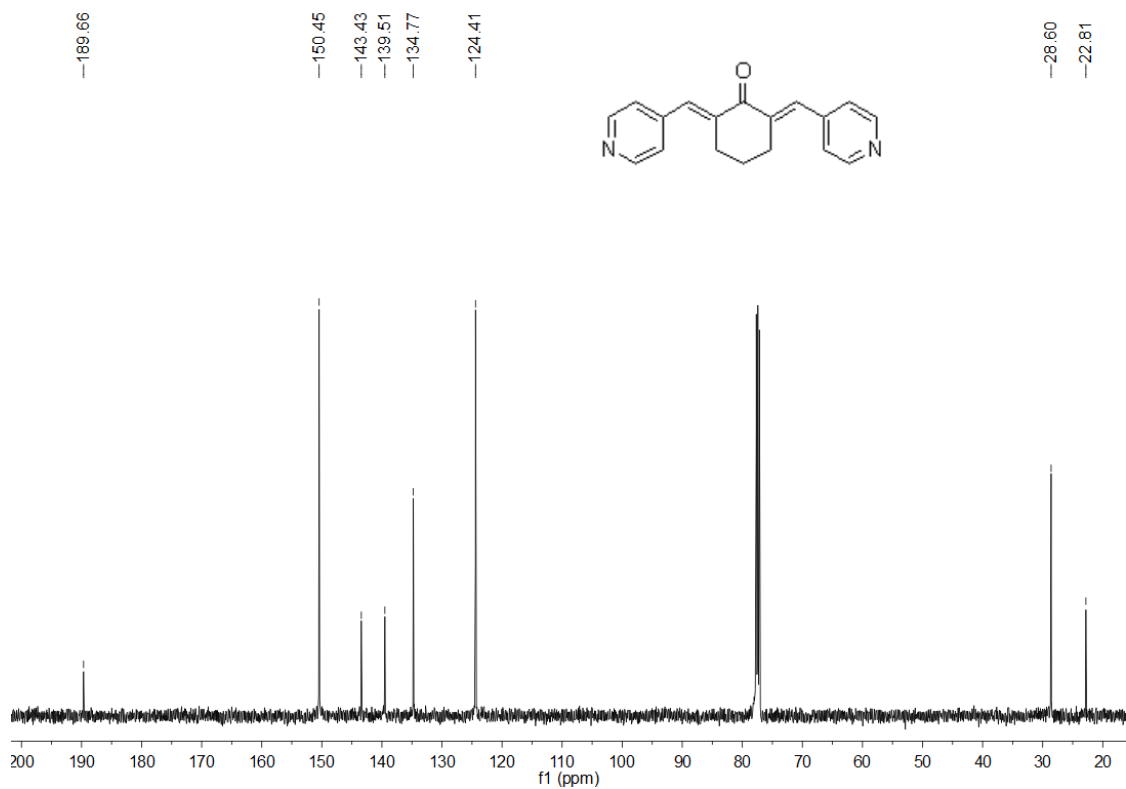

**Fig. S96**  $^{13}\text{C}\{^1\text{H}\}$  NMR spectrum of **8kk** (125 MHz,  $\text{CDCl}_3$ )

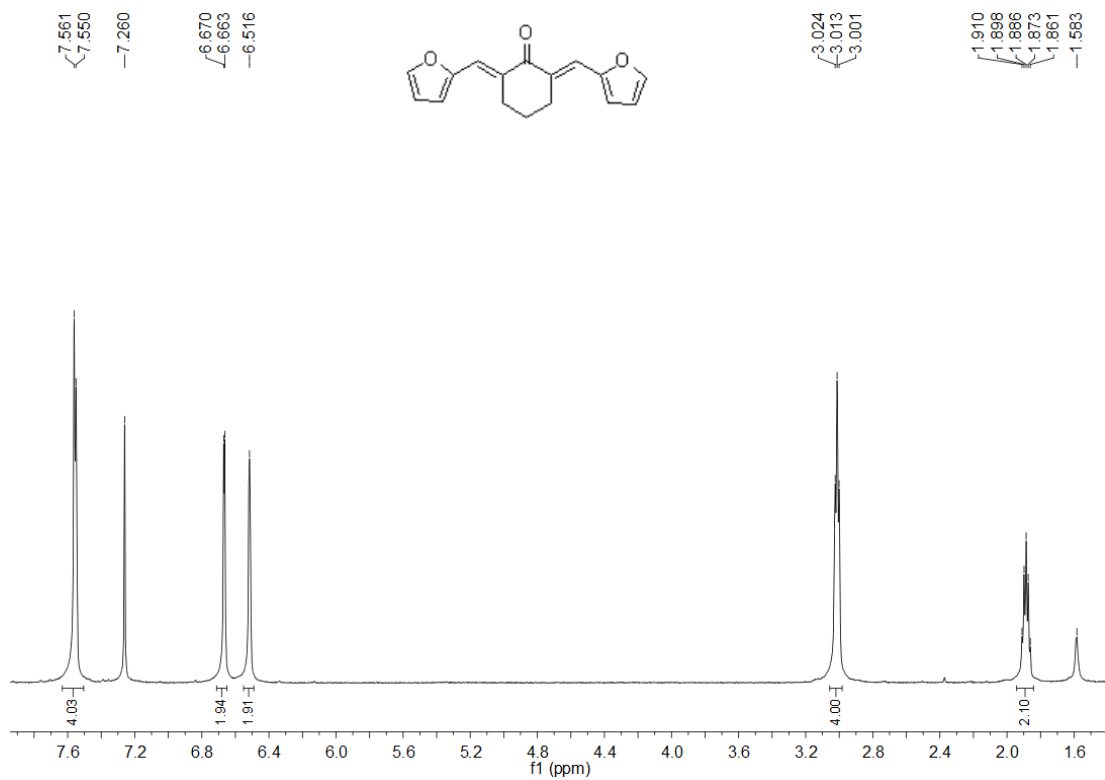

**Fig. S97**  $^1\text{H}$  NMR spectrum of **8ll** (500 MHz,  $\text{CDCl}_3$ )

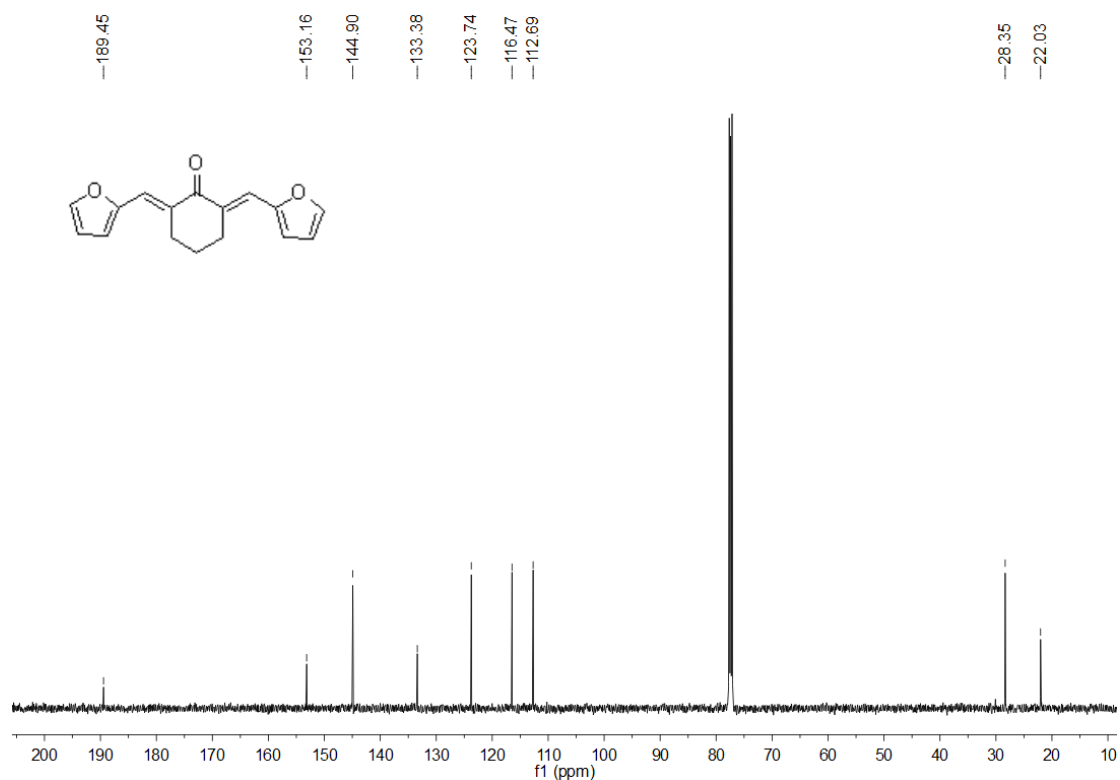

**Fig. S98**  $^{13}\text{C}\{^1\text{H}\}$  NMR spectrum of **8II** (125 MHz,  $\text{CDCl}_3$ )

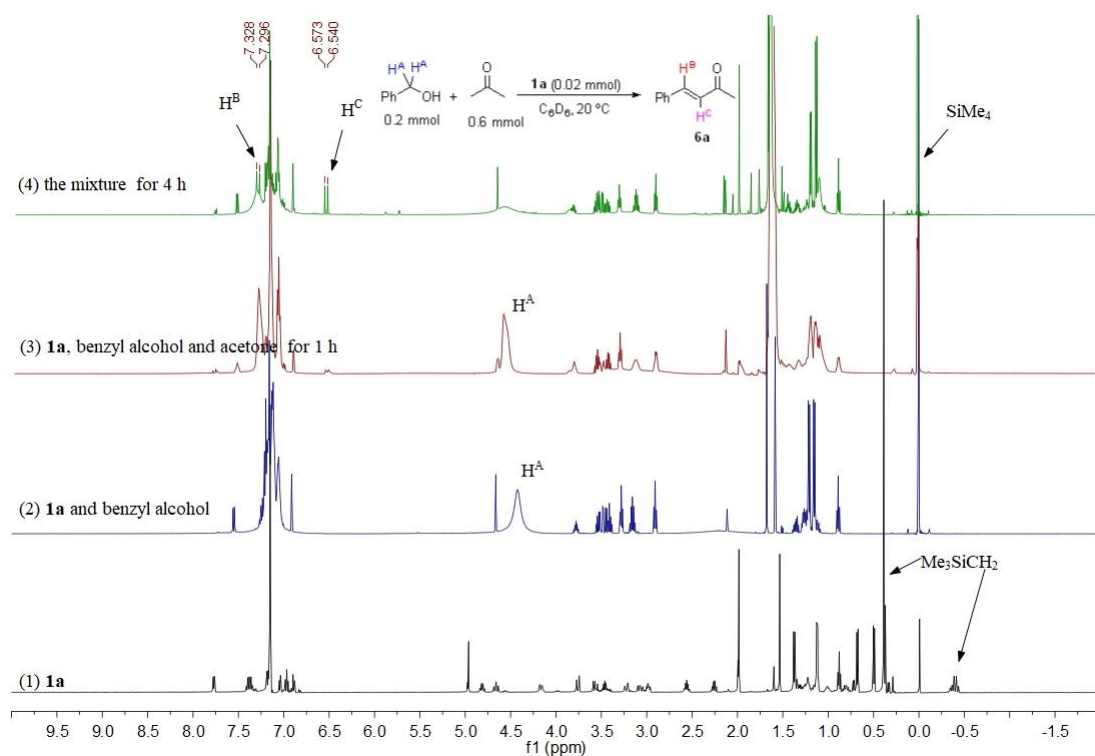

**Fig. S99**  $^1\text{H}$  NMR Monitoring the catalytic reaction of benzyl alcohol (0.2 mmol) and acetone (0.6 mmol) catalyzed by **1a** (0.02 mmol) in  $\text{C}_6\text{D}_6$  at room temperature.

### A gram-scale preparation of **4k**

9-Fluorenone (7.0 mmol) and **1a** (0.23 g, 0.35 mmol) were mixed in 10 mL of toluene, and then 1.54 mL of acetone (21.0 mmol) was added. The mixture was stirred at room temperature for 3 h. After that, volatiles of the mixture were removed under reduced pressure. The product was purified by silica gel column chromatography (ethyl acetate:petroleum ether = 1:6 ) to give the yellow solid **4k** (1.08 g, 86% yield).

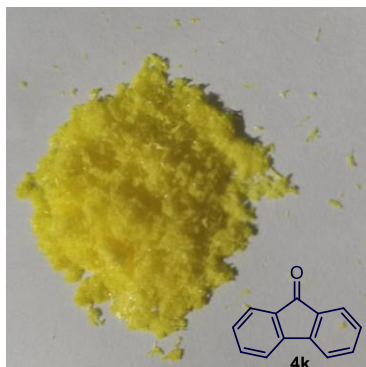

**Fig. S100** Samples of the catalytic product of 9-fluorenone.

## References

1. X. H. Yue, X. L. Yan, S. C. Huo, Q. Dong, J. H. Zhang, Z. Q. Hao, Z. G. Han and J. Lin, *Appl. Organometal. Chem.*, 2020, **34**, e5292.
2. Q. F. Wang, W. M. Du, T. T. Liu, H. N. Chai and Z. K. Yu, *Tetrahedron Lett.*, 2014, **55**, 1585–1588.
3. M. G. Coleman, A. N. Brown, B. A. Bolton and H. Guan, *Adv. Synth. Catal.*, 2010, **352**, 967–970.
4. Z. X. Zhang, Y. H. Wang, M. Wang, J. M. Lu, C. F. Zhang, L. H. Li, J. Y. Jiang and F. Wang, *Catal. Sci. Technol.*, 2016, **6**, 1693–1700.
5. H. B. Zou, J. Y. Dai and R. W. Wang, *Chem. Commun.*, 2019, **55**, 5898–5901.
6. C. Cheng, X. L. Ning, Y. M. Luo, C. Tian, X. W. Wang, Y. Guo, J. Y. Liu and Z. L. Zhang, *Med. Chem. Res.*, 2016, **25**, 1678–1685.
7. M. Soleiman-Beigi, M. Ghalavand, H. G. Venovel and H. Kohzadi, *J. Iran. Chem. Soc.*, 2021, **18**, 3267–3279.
8. A. A. da Silva, P. I. S. Maia, C. D. Lopes, S. de Albuquerque and M. S. Valle, *J. Mol. Struct.*, 2021, **1232**, e130014.
9. L. Zhang, S. Wang, E. Sheng and S. Zhou, *Green Chem.*, 2005, **7**, 683–686.
10. Y. Adachi, K. Kuniyoshi and H. Matsubara, *J. Fluor. Chem.*, 2017, **197**, 100–105.
11. S. Z. Vatsadze, M. A. Manaenkova, N. V. Sviridenkova, N. V. Zyk, D. P. Krut'ko, A. V. Churakov, M. Yu. Antipin, J. A. K. Howard and H. Lang, *Russ. Chem. Bull.*, 2006, **55**, 1184–1194.
